# Supplementary material for: Dissecting gonadal cell lineage specification and sex determination during human development using a single-cell transcriptomics approach
Source: Research Square preprint supplement (doi:10.21203/rs.3.rs-88057/v1), 2020-11-11
Supplement: Supplementary file 1 [file 7e0a77a7d9fdfb2d56355da2.xlsx]

## Sheet: Sheet1
Cells	UMAP_1	UMAP_2	Type	Week	Sex	Dtype	CellType	PGC_subType
AAACGGGAGCTAAGAT-1	2.80546	5.17849	1	6W	Male	HE6W_E1	PGC	mitotic
AAAGATGAGTGCTGCC-1	1.35811	1.72565	1	6W	Male	HE6W_E1	PGC	mitotic
AAAGCAATCCTGCTTG-1	1.04184	3.29599	1	6W	Male	HE6W_E1	PGC	mitotic
AAAGTAGAGGACATTA-1	-0.23924	1.30853	1	6W	Male	HE6W_E1	PGC	mitotic
AAAGTAGGTGCAGACA-1	0.236645	1.57975	1	6W	Male	HE6W_E1	PGC	mitotic
AAATGCCCATGCAACT-1	8.03475	5.52409	1	6W	Male	HE6W_E1	PGC	mitotic
AACACGTCACTCTGTC-1	2.11211	4.17218	1	6W	Male	HE6W_E1	PGC	mitotic
AACACGTTCCGATATG-1	2.39107	3.97589	1	6W	Male	HE6W_E1	PGC	mitotic
AACCGCGAGAAACCTA-1	-1.20003	1.52838	1	6W	Male	HE6W_E1	PGC	mitotic
AACCGCGCAATGTAAG-1	1.21398	3.06185	1	6W	Male	HE6W_E1	PGC	mitotic
AACGTTGAGAATTCCC-1	7.23129	6.39305	1	6W	Male	HE6W_E1	PGC	mitotic
AACGTTGAGTGGTCCC-1	-4.8635	1.30099	1	6W	Male	HE6W_E1	PGC	SPARC_Pos
AACTCAGAGAGTCGGT-1	-5.41504	2.6425	1	6W	Male	HE6W_E1	PGC	SPARC_Pos
AACTCAGGTATAGGGC-1	4.33847	4.62152	1	6W	Male	HE6W_E1	PGC	mitotic
AACTCCCTCCCTTGCA-1	-0.581816	0.687996	1	6W	Male	HE6W_E1	PGC	mitotic
AACTTTCAGCTAGTCT-1	-4.7891	1.25052	1	6W	Male	HE6W_E1	PGC	SPARC_Pos
AAGCCGCAGGTGTTAA-1	4.5022	6.19929	1	6W	Male	HE6W_E1	PGC	mitotic
AAGCCGCCACCAGATT-1	-0.879826	0.409918	1	6W	Male	HE6W_E1	PGC	Cycling
AAGCCGCGTCTTGATG-1	4.29882	6.03294	1	6W	Male	HE6W_E1	PGC	mitotic
AAGGCAGGTTCGTTGA-1	2.93867	4.60584	1	6W	Male	HE6W_E1	PGC	mitotic
AAGGTTCGTTGTACAC-1	1.21949	2.64385	1	6W	Male	HE6W_E1	PGC	mitotic
AAGTCTGCACTTCGAA-1	5.44354	6.88971	1	6W	Male	HE6W_E1	PGC	mitotic
AAGTCTGCAGTCAGAG-1	8.81834	4.83786	1	6W	Male	HE6W_E1	PGC	mitotic
AAGTCTGGTCTTGATG-1	4.74452	6.70502	1	6W	Male	HE6W_E1	PGC	mitotic
AAGTCTGGTGGTTTCA-1	2.17884	4.21252	1	6W	Male	HE6W_E1	PGC	mitotic
AATCCAGCACGAGAGT-1	5.73912	5.09315	1	6W	Male	HE6W_E1	PGC	mitotic
AATCCAGGTGCTCTTC-1	1.23422	4.67653	1	6W	Male	HE6W_E1	PGC	mitotic
ACACTGAGTTGAGTTC-1	4.13583	5.57957	1	6W	Male	HE6W_E1	PGC	mitotic
ACACTGATCGCATGAT-1	-0.784132	0.719536	1	6W	Male	HE6W_E1	PGC	mitotic
ACAGCCGCACTATCTT-1	5.67414	6.02402	1	6W	Male	HE6W_E1	PGC	mitotic
ACAGCCGGTTACCGAT-1	6.41615	6.76855	1	6W	Male	HE6W_E1	PGC	mitotic
ACAGCCGTCTAACCGA-1	4.09539	4.97515	1	6W	Male	HE6W_E1	PGC	mitotic
ACAGCCGTCTACCAGA-1	5.24081	5.89933	1	6W	Male	HE6W_E1	PGC	mitotic
ACAGCTACAAGCTGGA-1	-5.34319	1.56102	1	6W	Male	HE6W_E1	PGC	SPARC_Pos
ACAGCTAGTACGCTGC-1	6.01049	5.64631	1	6W	Male	HE6W_E1	PGC	mitotic
ACATACGTCTCATTCA-1	4.53435	6.53286	1	6W	Male	HE6W_E1	PGC	mitotic
ACATCAGCAATGGAAT-1	4.16716	5.38015	1	6W	Male	HE6W_E1	PGC	mitotic
ACATCAGGTCAAAGAT-1	2.41525	4.93514	1	6W	Male	HE6W_E1	PGC	mitotic
ACCCACTGTCATTAGC-1	3.98002	4.81414	1	6W	Male	HE6W_E1	PGC	mitotic
ACCGTAACAGCGTTCG-1	7.60894	6.31597	1	6W	Male	HE6W_E1	PGC	mitotic
ACCGTAATCGGAATCT-1	5.05364	5.65772	1	6W	Male	HE6W_E1	PGC	mitotic
ACGAGCCAGCTAGTGG-1	-2.11844	3.37538	1	6W	Male	HE6W_E1	PGC	mitotic
ACGAGCCCATACTCTT-1	5.49248	6.52397	1	6W	Male	HE6W_E1	PGC	mitotic
ACGAGCCGTCCAGTTA-1	5.03355	5.24603	1	6W	Male	HE6W_E1	PGC	mitotic
ACGAGGAAGAATCTCC-1	-5.83651	1.73661	1	6W	Male	HE6W_E1	PGC	SPARC_Pos
ACGAGGAAGACAAGCC-1	7.89091	6.29055	1	6W	Male	HE6W_E1	PGC	mitotic
ACGAGGATCAAGATCC-1	7.70553	6.38589	1	6W	Male	HE6W_E1	PGC	mitotic
ACGATACTCGGAATCT-1	2.20301	3.84629	1	6W	Male	HE6W_E1	PGC	mitotic
ACGATGTCATCATCCC-1	-4.9511	1.71895	1	6W	Male	HE6W_E1	PGC	SPARC_Pos
ACGCAGCAGCCAGTTT-1	3.07162	5.0624	1	6W	Male	HE6W_E1	PGC	mitotic
ACGCAGCCAAGCTGAG-1	6.42764	4.6352	1	6W	Male	HE6W_E1	PGC	mitotic
ACGCAGCGTACGCTGC-1	5.53666	6.04074	1	6W	Male	HE6W_E1	PGC	mitotic
ACGCAGCGTCGCCATG-1	5.1954	4.95621	1	6W	Male	HE6W_E1	PGC	mitotic
ACGCCAGAGTCATGCT-1	2.8467	4.86228	1	6W	Male	HE6W_E1	PGC	mitotic
ACGGCCAAGCACAGGT-1	3.86754	6.39773	1	6W	Male	HE6W_E1	PGC	mitotic
ACGGGCTTCCTTTCTC-1	-5.42337	2.66081	1	6W	Male	HE6W_E1	PGC	SPARC_Pos
ACGTCAACACATTCGA-1	7.53889	4.73387	1	6W	Male	HE6W_E1	PGC	mitotic
ACGTCAATCTGCGACG-1	8.35492	5.84267	1	6W	Male	HE6W_E1	PGC	mitotic
ACTATCTGTACACCGC-1	-4.72877	1.10809	1	6W	Male	HE6W_E1	PGC	SPARC_Pos
ACTATCTTCAGCATGT-1	-0.840742	0.60083	1	6W	Male	HE6W_E1	PGC	mitotic
ACTGATGCAACACCCG-1	-0.739904	-0.0782858	1	6W	Male	HE6W_E1	PGC	mitotic
ACTGATGCATAAGACA-1	7.35884	6.31847	1	6W	Male	HE6W_E1	PGC	mitotic
ACTGATGGTTCCACGG-1	-0.196729	1.14434	1	6W	Male	HE6W_E1	PGC	mitotic
ACTGCTCAGGATGGAA-1	-0.113109	1.36719	1	6W	Male	HE6W_E1	PGC	mitotic
ACTGCTCTCATAAAGG-1	4.63069	5.20573	1	6W	Male	HE6W_E1	PGC	mitotic
ACTTACTTCCACGTTC-1	4.57086	5.79115	1	6W	Male	HE6W_E1	PGC	mitotic
AGACGTTCAGACTCGC-1	4.4623	5.5151	1	6W	Male	HE6W_E1	PGC	mitotic
AGAGTGGAGCCAGTAG-1	5.49715	6.14909	1	6W	Male	HE6W_E1	PGC	mitotic
AGCATACAGAAACCAT-1	2.92054	5.14256	1	6W	Male	HE6W_E1	PGC	mitotic
AGCCTAATCTTATCTG-1	5.45846	4.38171	1	6W	Male	HE6W_E1	PGC	mitotic
AGCGGTCCAGTATAAG-1	0.236011	1.64964	1	6W	Male	HE6W_E1	PGC	mitotic
AGCGGTCGTACGCTGC-1	-5.23125	2.01826	1	6W	Male	HE6W_E1	PGC	SPARC_Pos
AGCGTCGAGCCCAGCT-1	1.46173	4.15821	1	6W	Male	HE6W_E1	PGC	mitotic
AGCTCCTAGGTAGCTG-1	7.02297	5.23526	1	6W	Male	HE6W_E1	PGC	mitotic
AGCTTGAGTTTGGCGC-1	4.17592	6.4193	1	6W	Male	HE6W_E1	PGC	mitotic
AGGGAGTCAAATCCGT-1	8.00876	4.79484	1	6W	Male	HE6W_E1	PGC	mitotic
AGGGTGACAAGCCTAT-1	3.83715	5.30322	1	6W	Male	HE6W_E1	PGC	mitotic
AGGTCATCACTCGACG-1	7.94156	5.59011	1	6W	Male	HE6W_E1	PGC	mitotic
AGTAGTCGTCGAATCT-1	6.90408	5.8186	1	6W	Male	HE6W_E1	PGC	mitotic
AGTGAGGGTAGCAAAT-1	0.217506	2.22276	1	6W	Male	HE6W_E1	PGC	mitotic
AGTTGGTAGTGTTAGA-1	3.75632	6.02949	1	6W	Male	HE6W_E1	PGC	mitotic
ATAACGCAGCGAGAAA-1	6.80671	6.17926	1	6W	Male	HE6W_E1	PGC	mitotic
ATAAGAGCAGACAAGC-1	6.57464	6.50572	1	6W	Male	HE6W_E1	PGC	mitotic
ATAGACCGTCTAGTCA-1	4.48785	6.06389	1	6W	Male	HE6W_E1	PGC	mitotic
ATCACGAGTCTGATCA-1	5.73454	6.17416	1	6W	Male	HE6W_E1	PGC	mitotic
ATCCACCCAGCGTAAG-1	-0.677431	0.574754	1	6W	Male	HE6W_E1	PGC	mitotic
ATCCGAAAGTCCCACG-1	0.822308	3.26342	1	6W	Male	HE6W_E1	PGC	mitotic
ATCCGAAGTATCGCAT-1	-4.9002	2.71778	1	6W	Male	HE6W_E1	PGC	SPARC_Pos
ATCGAGTGTCAAACTC-1	2.15993	4.02099	1	6W	Male	HE6W_E1	PGC	mitotic
ATCTACTCATCAGTCA-1	-5.5429	1.79872	1	6W	Male	HE6W_E1	PGC	SPARC_Pos
ATCTACTCATTGGTAC-1	7.12799	4.66729	1	6W	Male	HE6W_E1	PGC	mitotic
ATCTACTGTGTTGGGA-1	3.48686	6.11812	1	6W	Male	HE6W_E1	PGC	mitotic
ATGAGGGGTCGACTAT-1	3.20439	5.60493	1	6W	Male	HE6W_E1	PGC	mitotic
ATGAGGGTCGTTACAG-1	4.69048	6.09653	1	6W	Male	HE6W_E1	PGC	mitotic
ATGGGAGAGATAGTCA-1	2.94205	4.91949	1	6W	Male	HE6W_E1	PGC	mitotic
ATGGGAGCAAGTTGTC-1	0.270309	1.97806	1	6W	Male	HE6W_E1	PGC	mitotic
ATGGGAGGTACATGTC-1	3.58401	6.08473	1	6W	Male	HE6W_E1	PGC	mitotic
ATGGGAGTCTAACTTC-1	5.5181	5.40128	1	6W	Male	HE6W_E1	PGC	mitotic
ATGTGTGTCCACTCCA-1	3.0284	5.42211	1	6W	Male	HE6W_E1	PGC	mitotic
ATTACTCAGCGATCCC-1	6.48052	5.46238	1	6W	Male	HE6W_E1	PGC	mitotic
ATTCTACAGAAACCAT-1	3.40485	5.4783	1	6W	Male	HE6W_E1	PGC	mitotic
CAACTAGAGCATCATC-1	4.36542	6.17359	1	6W	Male	HE6W_E1	PGC	mitotic
CAACTAGTCCTAGTGA-1	0.62507	1.93756	1	6W	Male	HE6W_E1	PGC	mitotic
CAAGAAAAGGTGTTAA-1	3.31623	5.62356	1	6W	Male	HE6W_E1	PGC	mitotic
CAAGGCCGTCTCTTTA-1	5.73992	6.60766	1	6W	Male	HE6W_E1	PGC	mitotic
CAAGGCCTCCAAAGTC-1	0.0716469	1.26056	1	6W	Male	HE6W_E1	PGC	mitotic
CAAGTTGTCAGCTGGC-1	-0.650479	0.813512	1	6W	Male	HE6W_E1	PGC	mitotic
CAAGTTGTCATATCGG-1	8.04186	5.97264	1	6W	Male	HE6W_E1	PGC	mitotic
CACAAACAGTCATCCA-1	-0.651306	0.915562	1	6W	Male	HE6W_E1	PGC	mitotic
CACAAACTCTTGAGGT-1	4.8395	6.7084	1	6W	Male	HE6W_E1	PGC	mitotic
CACACAAAGAAGGTGA-1	6.59572	4.54176	1	6W	Male	HE6W_E1	PGC	mitotic
CACACCTGTTCCACTC-1	1.7186	2.5543	1	6W	Male	HE6W_E1	PGC	mitotic
CACAGGCCACTTGGAT-1	4.62183	5.77884	1	6W	Male	HE6W_E1	PGC	mitotic
CACAGTACAGGGATTG-1	-0.204852	1.56191	1	6W	Male	HE6W_E1	PGC	mitotic
CACATTTAGCTGAACG-1	1.53087	3.23016	1	6W	Male	HE6W_E1	PGC	mitotic
CACCACTGTCTAGTGT-1	1.38775	4.10724	1	6W	Male	HE6W_E1	PGC	mitotic
CACCAGGGTACTTCTT-1	4.44854	6.3156	1	6W	Male	HE6W_E1	PGC	mitotic
CACCTTGAGTCTTGCA-1	5.48216	4.72607	1	6W	Male	HE6W_E1	PGC	mitotic
CACCTTGCAACGATGG-1	1.38239	2.79058	1	6W	Male	HE6W_E1	PGC	mitotic
CACCTTGTCCCACTTG-1	3.31566	4.40778	1	6W	Male	HE6W_E1	PGC	mitotic
CACTCCATCGGGAGTA-1	5.76903	6.88563	1	6W	Male	HE6W_E1	PGC	mitotic
CAGAATCCAGTCAGCC-1	1.8095	3.77395	1	6W	Male	HE6W_E1	PGC	mitotic
CAGCAGCAGCGTTCCG-1	3.9857	5.46512	1	6W	Male	HE6W_E1	PGC	mitotic
CAGCATAGTTGTCTTT-1	1.8803	4.57506	1	6W	Male	HE6W_E1	PGC	mitotic
CAGCATATCGACGGAA-1	3.05554	5.50879	1	6W	Male	HE6W_E1	PGC	mitotic
CAGCCGAAGCAGGCTA-1	3.0902	4.74686	1	6W	Male	HE6W_E1	PGC	mitotic
CAGCCGAAGGATTCGG-1	-5.23117	2.38576	1	6W	Male	HE6W_E1	PGC	SPARC_Pos
CAGCCGACACATTCGA-1	-0.620383	0.344498	1	6W	Male	HE6W_E1	PGC	mitotic
CAGCTAAGTATGCTTG-1	-5.09122	2.5712	1	6W	Male	HE6W_E1	PGC	SPARC_Pos
CAGTAACGTGTTCGAT-1	5.66426	6.96138	1	6W	Male	HE6W_E1	PGC	mitotic
CAGTCCTAGACGCACA-1	2.48252	4.20277	1	6W	Male	HE6W_E1	PGC	mitotic
CATATGGGTCGCCATG-1	2.99007	4.98697	1	6W	Male	HE6W_E1	PGC	mitotic
CATATTCTCATCGCTC-1	-0.511251	0.618658	1	6W	Male	HE6W_E1	PGC	mitotic
CATCAAGCATTCCTCG-1	4.30806	6.18067	1	6W	Male	HE6W_E1	PGC	mitotic
CATCAAGGTTACGACT-1	0.599432	0.494128	1	6W	Male	HE6W_E1	PGC	mitotic
CATCAAGTCCACGACG-1	1.21934	4.5103	1	6W	Male	HE6W_E1	PGC	mitotic
CATCCACAGGCCCTCA-1	0.271118	1.70607	1	6W	Male	HE6W_E1	PGC	mitotic
CATCCACCACACATGT-1	5.33189	6.01738	1	6W	Male	HE6W_E1	PGC	mitotic
CATCCACGTCCGTTAA-1	5.56863	6.64787	1	6W	Male	HE6W_E1	PGC	mitotic
CATCGGGCATGTAGTC-1	0.157079	0.92634	1	6W	Male	HE6W_E1	PGC	mitotic
CATGACAAGGCTATCT-1	5.17707	5.50521	1	6W	Male	HE6W_E1	PGC	mitotic
CATGACACAAAGCAAT-1	2.99838	4.69342	1	6W	Male	HE6W_E1	PGC	mitotic
CATGCCTAGGGCTTGA-1	7.73274	3.336	1	6W	Male	HE6W_E1	PGC	mitotic
CATGCCTCAGTTCCCT-1	-4.78321	0.983303	1	6W	Male	HE6W_E1	PGC	SPARC_Pos
CATGCCTGTCCGCTGA-1	6.00757	6.99436	1	6W	Male	HE6W_E1	PGC	mitotic
CATTATCCATGCGCAC-1	7.14874	5.60502	1	6W	Male	HE6W_E1	PGC	mitotic
CATTCGCTCAGCTTAG-1	7.01561	6.461	1	6W	Male	HE6W_E1	PGC	mitotic
CCAATCCCACAAGTAA-1	6.43319	5.28684	1	6W	Male	HE6W_E1	PGC	mitotic
CCACCTAAGAGACTAT-1	-1.64252	-0.754446	1	6W	Male	HE6W_E1	PGC	Cycling
CCACCTAGTAAACGCG-1	6.12171	6.94879	1	6W	Male	HE6W_E1	PGC	mitotic
CCACGGACAAGTAGTA-1	5.32652	5.83516	1	6W	Male	HE6W_E1	PGC	mitotic
CCACGGAGTAGCCTAT-1	4.0569	6.47974	1	6W	Male	HE6W_E1	PGC	mitotic
CCACTACGTTTAGCTG-1	3.39626	5.16059	1	6W	Male	HE6W_E1	PGC	mitotic
CCATGTCAGCTAGTTC-1	5.77979	6.29382	1	6W	Male	HE6W_E1	PGC	mitotic
CCATTCGAGCTACCGC-1	8.40594	5.9488	1	6W	Male	HE6W_E1	PGC	mitotic
CCCAATCAGTCTCCTC-1	8.05212	5.0625	1	6W	Male	HE6W_E1	PGC	mitotic
CCCAGTTCATTCTCAT-1	-2.09129	-1.15635	1	6W	Male	HE6W_E1	PGC	Cycling
CCCAGTTTCCCATTTA-1	5.87064	5.76934	1	6W	Male	HE6W_E1	PGC	mitotic
CCCATACAGCGACGTA-1	1.49281	3.56374	1	6W	Male	HE6W_E1	PGC	mitotic
CCCATACGTGGGTCAA-1	2.35174	3.2407	1	6W	Male	HE6W_E1	PGC	mitotic
CCGGGATAGTCACGCC-1	4.49612	6.11237	1	6W	Male	HE6W_E1	PGC	mitotic
CCGTACTTCAGCATGT-1	-0.828443	0.506391	1	6W	Male	HE6W_E1	PGC	mitotic
CCGTGGATCCCAACGG-1	0.960352	2.9228	1	6W	Male	HE6W_E1	PGC	mitotic
CCGTTCAGTGTTCGAT-1	3.30599	5.44866	1	6W	Male	HE6W_E1	PGC	mitotic
CCGTTCATCAACGGGA-1	4.58512	6.03564	1	6W	Male	HE6W_E1	PGC	mitotic
CCTATTAAGATCCCGC-1	6.89569	4.4868	1	6W	Male	HE6W_E1	PGC	mitotic
CCTCTGAAGTGACTCT-1	4.64409	6.58372	1	6W	Male	HE6W_E1	PGC	mitotic
CCTCTGAGTCGCGAAA-1	1.53975	3.87691	1	6W	Male	HE6W_E1	PGC	mitotic
CCTTCCCCAAGTTGTC-1	-1.2678	5.41452	1	6W	Male	HE6W_E1	PGC	mitotic
CCTTCCCGTGTTTGGT-1	4.33726	4.57517	1	6W	Male	HE6W_E1	PGC	mitotic
CCTTCCCGTTACGCGC-1	1.1183	3.64807	1	6W	Male	HE6W_E1	PGC	mitotic
CCTTCGAAGACTAGAT-1	4.23181	4.53775	1	6W	Male	HE6W_E1	PGC	mitotic
CCTTCGAAGCGTTTAC-1	1.60885	2.48891	1	6W	Male	HE6W_E1	PGC	mitotic
CCTTTCTTCGTTGCCT-1	1.68257	3.71548	1	6W	Male	HE6W_E1	PGC	mitotic
CGACCTTAGATCCCAT-1	3.77105	5.78004	1	6W	Male	HE6W_E1	PGC	mitotic
CGACTTCGTCATCCCT-1	5.54179	6.95311	1	6W	Male	HE6W_E1	PGC	mitotic
CGACTTCGTGATGTCT-1	3.96212	5.37908	1	6W	Male	HE6W_E1	PGC	mitotic
CGAGCACGTAGAAGGA-1	-0.723923	0.84668	1	6W	Male	HE6W_E1	PGC	mitotic
CGAGCACTCTTCATGT-1	4.49749	6.51111	1	6W	Male	HE6W_E1	PGC	mitotic
CGAGCCACACATGGGA-1	4.12765	5.3907	1	6W	Male	HE6W_E1	PGC	mitotic
CGAGCCATCCGTTGCT-1	3.62451	6.05997	1	6W	Male	HE6W_E1	PGC	mitotic
CGATGTACACTCGACG-1	7.21645	5.64454	1	6W	Male	HE6W_E1	PGC	mitotic
CGCCAAGAGTGTTAGA-1	6.16692	5.4898	1	6W	Male	HE6W_E1	PGC	mitotic
CGCCAAGTCTTATCTG-1	6.62877	6.61236	1	6W	Male	HE6W_E1	PGC	mitotic
CGCGGTACACCACGTG-1	4.77428	6.23887	1	6W	Male	HE6W_E1	PGC	mitotic
CGCGGTAGTCCAGTAT-1	6.6744	5.66585	1	6W	Male	HE6W_E1	PGC	mitotic
CGCGGTATCCCGGATG-1	4.52916	4.24533	1	6W	Male	HE6W_E1	PGC	mitotic
CGCTATCGTCGCGAAA-1	7.23811	6.34839	1	6W	Male	HE6W_E1	PGC	mitotic
CGCTGGAAGCTATGCT-1	2.75631	3.40957	1	6W	Male	HE6W_E1	PGC	mitotic
CGCTGGAAGGAGCGTT-1	5.79489	6.66502	1	6W	Male	HE6W_E1	PGC	mitotic
CGCTGGACACAGTCGC-1	8.57729	5.52699	1	6W	Male	HE6W_E1	PGC	mitotic
CGCTGGATCTGTGCAA-1	3.0668	5.43935	1	6W	Male	HE6W_E1	PGC	mitotic
CGCTTCACACATTCGA-1	2.99327	4.6208	1	6W	Male	HE6W_E1	PGC	mitotic
CGGACGTTCAACACCA-1	0.659262	2.72953	1	6W	Male	HE6W_E1	PGC	mitotic
CGGACTGCACGCCAGT-1	1.56115	3.9071	1	6W	Male	HE6W_E1	PGC	mitotic
CGGCTAGAGTGCGTGA-1	5.33902	5.95564	1	6W	Male	HE6W_E1	PGC	mitotic
CGGGTCACAGTCACTA-1	3.3829	5.12005	1	6W	Male	HE6W_E1	PGC	mitotic
CGGGTCATCACAAACC-1	1.59315	4.40111	1	6W	Male	HE6W_E1	PGC	mitotic
CGGTTAATCGTTACGA-1	0.0201585	1.38173	1	6W	Male	HE6W_E1	PGC	mitotic
CGTAGCGCACCTATCC-1	6.92596	4.45423	1	6W	Male	HE6W_E1	PGC	mitotic
CGTAGGCTCTGTCCGT-1	6.85951	6.06272	1	6W	Male	HE6W_E1	PGC	mitotic
CGTCAGGTCAATAAGG-1	3.42912	3.54499	1	6W	Male	HE6W_E1	PGC	mitotic
CGTCCATAGACCTAGG-1	6.17889	4.86288	1	6W	Male	HE6W_E1	PGC	mitotic
CGTCCATCAGCTGTAT-1	4.68603	6.59762	1	6W	Male	HE6W_E1	PGC	mitotic
CGTCCATGTTAAGTAG-1	4.59224	6.6156	1	6W	Male	HE6W_E1	PGC	mitotic
CGTCTACGTCTTGTCC-1	7.43297	5.94742	1	6W	Male	HE6W_E1	PGC	mitotic
CGTGAGCCAATAACGA-1	1.76433	4.58677	1	6W	Male	HE6W_E1	PGC	mitotic
CGTGTAAAGTTACCCA-1	1.37725	3.95146	1	6W	Male	HE6W_E1	PGC	mitotic
CGTTAGAAGGAGTAGA-1	3.39333	5.45804	1	6W	Male	HE6W_E1	PGC	mitotic
CGTTAGACAGTATCTG-1	4.43482	6.19063	1	6W	Male	HE6W_E1	PGC	mitotic
CGTTAGACATGGGACA-1	6.73551	5.26128	1	6W	Male	HE6W_E1	PGC	mitotic
CGTTCTGCAGCTTAAC-1	5.10673	5.58045	1	6W	Male	HE6W_E1	PGC	mitotic
CGTTGGGAGTACTTGC-1	8.84538	4.96913	1	6W	Male	HE6W_E1	PGC	mitotic
CTAAGACAGGGATCTG-1	4.39083	4.3531	1	6W	Male	HE6W_E1	PGC	mitotic
CTAAGACCAGCGTAAG-1	4.37875	6.33826	1	6W	Male	HE6W_E1	PGC	mitotic
CTAAGACCAGGACGTA-1	4.44123	4.90781	1	6W	Male	HE6W_E1	PGC	mitotic
CTAAGACGTTTGGGCC-1	6.48544	6.34733	1	6W	Male	HE6W_E1	PGC	mitotic
CTAATGGCATTGCGGC-1	7.05217	6.1137	1	6W	Male	HE6W_E1	PGC	mitotic
CTAATGGGTTCCGGCA-1	-0.623507	0.630565	1	6W	Male	HE6W_E1	PGC	mitotic
CTACATTAGGTGCAAC-1	4.50835	5.58553	1	6W	Male	HE6W_E1	PGC	mitotic
CTACCCACAATCTGCA-1	-0.776518	0.509341	1	6W	Male	HE6W_E1	PGC	mitotic
CTACGTCTCGATGAGG-1	-0.0449112	1.67217	1	6W	Male	HE6W_E1	PGC	mitotic
CTAGAGTCATCCTTGC-1	3.56747	5.54285	1	6W	Male	HE6W_E1	PGC	mitotic
CTAGCCTAGGCAGTCA-1	-5.66958	1.97445	1	6W	Male	HE6W_E1	PGC	SPARC_Pos
CTAGTGATCACTCCTG-1	5.57022	7.03207	1	6W	Male	HE6W_E1	PGC	mitotic
CTCACACCATCTACGA-1	-4.80373	1.95737	1	6W	Male	HE6W_E1	PGC	SPARC_Pos
CTCAGAAAGAATTGTG-1	4.59719	5.63443	1	6W	Male	HE6W_E1	PGC	mitotic
CTCGAAACAGATGAGC-1	-1.60302	1.53768	1	6W	Male	HE6W_E1	PGC	mitotic
CTCGAAATCCGCGTTT-1	5.66609	4.72087	1	6W	Male	HE6W_E1	PGC	mitotic
CTCGGGAAGTAGATGT-1	0.188823	1.13681	1	6W	Male	HE6W_E1	PGC	mitotic
CTCGGGATCTCATTCA-1	8.23976	5.99287	1	6W	Male	HE6W_E1	PGC	mitotic
CTCGTACAGTTGCAGG-1	7.30664	6.63028	1	6W	Male	HE6W_E1	PGC	mitotic
CTCTAATCATGCATGT-1	5.56821	4.76751	1	6W	Male	HE6W_E1	PGC	mitotic
CTCTACGGTGATAAGT-1	4.97964	6.28327	1	6W	Male	HE6W_E1	PGC	mitotic
CTCTGGTCATCGGAAG-1	6.47053	5.95762	1	6W	Male	HE6W_E1	PGC	mitotic
CTGAAACGTCAGTGGA-1	6.02494	5.66391	1	6W	Male	HE6W_E1	PGC	mitotic
CTGCCTAAGAGCCTAG-1	0.987044	2.94564	1	6W	Male	HE6W_E1	PGC	mitotic
CTGCCTAAGTGAAGTT-1	4.73438	5.66834	1	6W	Male	HE6W_E1	PGC	mitotic
CTGCCTAGTGTGACGA-1	4.22607	6.08715	1	6W	Male	HE6W_E1	PGC	mitotic
CTGCGGACAATAGAGT-1	4.87169	6.68765	1	6W	Male	HE6W_E1	PGC	mitotic
CTGCTGTGTGCAGGTA-1	2.16054	4.84834	1	6W	Male	HE6W_E1	PGC	mitotic
CTGTTTATCGCCAGCA-1	6.97527	6.16073	1	6W	Male	HE6W_E1	PGC	mitotic
CTTAACTGTGATGTCT-1	0.43197	2.62264	1	6W	Male	HE6W_E1	PGC	mitotic
CTTAGGAAGCCACGTC-1	-5.27193	2.21969	1	6W	Male	HE6W_E1	PGC	SPARC_Pos
CTTAGGACAGGGAGAG-1	5.90533	6.96299	1	6W	Male	HE6W_E1	PGC	mitotic
CTTGGCTCATACTACG-1	-5.69996	2.1421	1	6W	Male	HE6W_E1	PGC	SPARC_Pos
GAAACTCCAGACGCTC-1	4.18905	5.3242	1	6W	Male	HE6W_E1	PGC	mitotic
GAAATGACACCATGTA-1	4.19397	5.22837	1	6W	Male	HE6W_E1	PGC	mitotic
GAAATGAGTGTTAAGA-1	0.577321	1.9353	1	6W	Male	HE6W_E1	PGC	mitotic
GAACCTAGTTTCGCTC-1	7.13536	5.74108	1	6W	Male	HE6W_E1	PGC	mitotic
GAAGCAGTCTGCGGCA-1	0.430256	2.47527	1	6W	Male	HE6W_E1	PGC	mitotic
GAATAAGTCAGGCAAG-1	3.83005	6.39725	1	6W	Male	HE6W_E1	PGC	mitotic
GAATGAATCCAAACTG-1	3.63261	5.852	1	6W	Male	HE6W_E1	PGC	mitotic
GACACGCTCCATTCTA-1	5.76652	5.82902	1	6W	Male	HE6W_E1	PGC	mitotic
GACAGAGTCACCACCT-1	3.89527	2.17138	1	6W	Male	HE6W_E1	PGC	mitotic
GACCAATCACGCCAGT-1	1.44314	4.3905	1	6W	Male	HE6W_E1	PGC	mitotic
GACCTGGCAAGCCGCT-1	3.87105	6.09541	1	6W	Male	HE6W_E1	PGC	mitotic
GACGTGCCATGATCCA-1	8.41083	5.97227	1	6W	Male	HE6W_E1	PGC	mitotic
GACGTGCCATGCATGT-1	7.07647	5.86276	1	6W	Male	HE6W_E1	PGC	mitotic
GACGTTAAGCATGGCA-1	-5.31495	2.78427	1	6W	Male	HE6W_E1	PGC	SPARC_Pos
GACGTTATCGGACAAG-1	4.18062	6.45601	1	6W	Male	HE6W_E1	PGC	mitotic
GATCAGTCACATTTCT-1	4.45409	6.27544	1	6W	Male	HE6W_E1	PGC	mitotic
GATCAGTTCCGTTGCT-1	7.08625	5.59662	1	6W	Male	HE6W_E1	PGC	mitotic
GATCGATCAAGCCTAT-1	3.86225	4.9225	1	6W	Male	HE6W_E1	PGC	mitotic
GATCGATCACCATCCT-1	0.600193	2.25	1	6W	Male	HE6W_E1	PGC	mitotic
GATCGTACACCGAATT-1	3.66529	6.23554	1	6W	Male	HE6W_E1	PGC	mitotic
GATCGTATCAACGGCC-1	3.06675	4.46993	1	6W	Male	HE6W_E1	PGC	mitotic
GATCTAGAGCTCCCAG-1	4.34833	6.07093	1	6W	Male	HE6W_E1	PGC	mitotic
GATGAGGGTGAGTGAC-1	3.7267	5.99088	1	6W	Male	HE6W_E1	PGC	mitotic
GATGAGGTCGCAAACT-1	4.88399	6.62413	1	6W	Male	HE6W_E1	PGC	mitotic
GATGCTAGTGTGACGA-1	8.04589	4.79672	1	6W	Male	HE6W_E1	PGC	mitotic
GATTCAGAGGAGCGAG-1	0.184292	1.71426	1	6W	Male	HE6W_E1	PGC	mitotic
GATTCAGGTTAAGAAC-1	8.49023	5.72471	1	6W	Male	HE6W_E1	PGC	mitotic
GCAATCAAGAAACCTA-1	-0.161207	1.39974	1	6W	Male	HE6W_E1	PGC	mitotic
GCAATCATCACAATGC-1	0.127902	1.78766	1	6W	Male	HE6W_E1	PGC	mitotic
GCAATCATCGTCTGAA-1	4.73627	6.34515	1	6W	Male	HE6W_E1	PGC	mitotic
GCACTCTGTACCGCTG-1	6.88557	5.52203	1	6W	Male	HE6W_E1	PGC	mitotic
GCAGCCAGTCTGATTG-1	2.32863	4.56354	1	6W	Male	HE6W_E1	PGC	mitotic
GCAGTTAAGAATTGTG-1	7.38176	3.98509	1	6W	Male	HE6W_E1	PGC	mitotic
GCAGTTAAGGATGGAA-1	5.29355	6.67239	1	6W	Male	HE6W_E1	PGC	mitotic
GCATACAAGAGCTATA-1	4.32657	6.25536	1	6W	Male	HE6W_E1	PGC	mitotic
GCATACAAGAGCTTCT-1	4.46676	5.1207	1	6W	Male	HE6W_E1	PGC	mitotic
GCATACAAGTTCGCGC-1	6.1671	5.50232	1	6W	Male	HE6W_E1	PGC	mitotic
GCATACAGTTATCACG-1	8.68922	5.73568	1	6W	Male	HE6W_E1	PGC	mitotic
GCATGATAGGGCATGT-1	8.18237	5.7929	1	6W	Male	HE6W_E1	PGC	mitotic
GCATGCGGTCGCTTTC-1	5.63233	6.1006	1	6W	Male	HE6W_E1	PGC	mitotic
GCCAAATGTCTAGCCG-1	8.59541	5.55305	1	6W	Male	HE6W_E1	PGC	mitotic
GCGACCAAGTACGCCC-1	-5.25063	1.94827	1	6W	Male	HE6W_E1	PGC	SPARC_Pos
GCGACCAGTCCAGTTA-1	2.36572	4.56299	1	6W	Male	HE6W_E1	PGC	mitotic
GCGACCATCCTTTACA-1	2.85766	3.67756	1	6W	Male	HE6W_E1	PGC	mitotic
GCGAGAACACGACTCG-1	-5.19287	2.77892	1	6W	Male	HE6W_E1	PGC	SPARC_Pos
GCGCAACGTTATCCGA-1	6.61441	5.70798	1	6W	Male	HE6W_E1	PGC	mitotic
GCGCAACGTTGATTCG-1	-5.01819	2.5771	1	6W	Male	HE6W_E1	PGC	SPARC_Pos
GCGCAGTAGGCAATTA-1	2.09634	0.864387	1	6W	Male	HE6W_E1	PGC	mitotic
GCGCCAAGTCTCCACT-1	4.66196	6.56907	1	6W	Male	HE6W_E1	PGC	mitotic
GCGGGTTCAGCTGCTG-1	3.60279	6.05342	1	6W	Male	HE6W_E1	PGC	mitotic
GCGGGTTGTTCCACGG-1	1.24902	3.77555	1	6W	Male	HE6W_E1	PGC	mitotic
GCGGGTTGTTGGAGGT-1	3.45014	5.77708	1	6W	Male	HE6W_E1	PGC	mitotic
GCTCCTAAGACTGGGT-1	4.18	5.11758	1	6W	Male	HE6W_E1	PGC	mitotic
GCTCCTACATCCTAGA-1	-0.0206928	1.22786	1	6W	Male	HE6W_E1	PGC	mitotic
GCTCCTAGTTATCACG-1	-5.03718	2.66189	1	6W	Male	HE6W_E1	PGC	SPARC_Pos
GCTCCTATCATATCGG-1	5.94703	5.95565	1	6W	Male	HE6W_E1	PGC	mitotic
GCTGCTTGTCCGTCAG-1	4.81912	6.81685	1	6W	Male	HE6W_E1	PGC	mitotic
GGAATAAGTCTTCTCG-1	6.42643	5.55518	1	6W	Male	HE6W_E1	PGC	mitotic
GGAATAAGTGAGCGAT-1	1.67437	3.56761	1	6W	Male	HE6W_E1	PGC	mitotic
GGACAAGCAAGGTTTC-1	4.29713	5.54092	1	6W	Male	HE6W_E1	PGC	mitotic
GGACAGAGTGAAAGAG-1	7.11457	6.60361	1	6W	Male	HE6W_E1	PGC	mitotic
GGACATTAGGCATGGT-1	0.0959717	1.26553	1	6W	Male	HE6W_E1	PGC	mitotic
GGACATTGTACCGAGA-1	-4.78387	1.01043	1	6W	Male	HE6W_E1	PGC	SPARC_Pos
GGACGTCCAAGCTGTT-1	2.99281	4.51563	1	6W	Male	HE6W_E1	PGC	mitotic
GGACGTCCACGAAACG-1	5.68836	6.13357	1	6W	Male	HE6W_E1	PGC	mitotic
GGATGTTCAAGCGCTC-1	5.07061	5.84284	1	6W	Male	HE6W_E1	PGC	mitotic
GGATGTTTCCGAATGT-1	1.77531	4.10101	1	6W	Male	HE6W_E1	PGC	mitotic
GGATTACTCATTTGGG-1	1.3149	3.14346	1	6W	Male	HE6W_E1	PGC	mitotic
GGATTACTCGCGCCAA-1	1.03706	-0.328111	1	6W	Male	HE6W_E1	PGC	mitotic
GGCCGATAGTGCCAGA-1	-0.2016	-0.563276	1	6W	Male	HE6W_E1	PGC	Cycling
GGCCGATCATTCGACA-1	-4.43894	2.95832	1	6W	Male	HE6W_E1	PGC	mitotic
GGCGACTAGGGTCTCC-1	3.76872	5.9501	1	6W	Male	HE6W_E1	PGC	mitotic
GGCGACTCAAAGGTGC-1	3.60106	5.40133	1	6W	Male	HE6W_E1	PGC	mitotic
GGCGTGTAGATGTGGC-1	3.20549	5.79788	1	6W	Male	HE6W_E1	PGC	mitotic
GGCGTGTAGTTAACGA-1	-5.69065	1.93445	1	6W	Male	HE6W_E1	PGC	SPARC_Pos
GGCGTGTCACTGCCAG-1	6.26309	5.7963	1	6W	Male	HE6W_E1	PGC	mitotic
GGCTGGTAGAATTGTG-1	3.95339	5.31867	1	6W	Male	HE6W_E1	PGC	mitotic
GGGAATGGTCCTCCAT-1	2.86488	3.73381	1	6W	Male	HE6W_E1	PGC	mitotic
GGGAATGTCACAACGT-1	1.60831	3.47404	1	6W	Male	HE6W_E1	PGC	mitotic
GGGAATGTCGAGAGCA-1	7.1851	6.11556	1	6W	Male	HE6W_E1	PGC	mitotic
GGGACCTTCCGTCAAA-1	0.355517	1.06087	1	6W	Male	HE6W_E1	PGC	mitotic
GGGACCTTCGAGAGCA-1	0.513983	2.18095	1	6W	Male	HE6W_E1	PGC	mitotic
GGGATGACATTGGGCC-1	7.40408	5.87145	1	6W	Male	HE6W_E1	PGC	mitotic
GGGCACTAGTCGTACT-1	8.10132	4.72929	1	6W	Male	HE6W_E1	PGC	mitotic
GGGCATCTCTGGCGAC-1	1.45532	4.42896	1	6W	Male	HE6W_E1	PGC	mitotic
GGGTTGCGTCATGCCG-1	0.1514	1.09317	1	6W	Male	HE6W_E1	PGC	mitotic
GGTGAAGAGAATTGTG-1	4.67383	5.94391	1	6W	Male	HE6W_E1	PGC	mitotic
GGTGTTAAGAAAGTGG-1	-5.15316	1.44258	1	6W	Male	HE6W_E1	PGC	SPARC_Pos
GGTGTTATCTTAGAGC-1	-0.867375	0.459392	1	6W	Male	HE6W_E1	PGC	mitotic
GTAACGTCATATGGTC-1	-0.338505	1.29748	1	6W	Male	HE6W_E1	PGC	mitotic
GTAACGTTCAGCTCGG-1	3.27897	5.34781	1	6W	Male	HE6W_E1	PGC	mitotic
GTAACTGAGGGCATGT-1	3.68977	5.98815	1	6W	Male	HE6W_E1	PGC	mitotic
GTAACTGCACCTGGTG-1	4.51329	5.7779	1	6W	Male	HE6W_E1	PGC	mitotic
GTACGTAAGTAGTGCG-1	3.31854	4.39359	1	6W	Male	HE6W_E1	PGC	mitotic
GTACTCCAGTGGCACA-1	-4.93809	2.63605	1	6W	Male	HE6W_E1	PGC	SPARC_Pos
GTAGGCCCACCAGGCT-1	3.83703	6.09072	1	6W	Male	HE6W_E1	PGC	mitotic
GTAGGCCGTCGACTAT-1	3.54775	5.90144	1	6W	Male	HE6W_E1	PGC	mitotic
GTCAAGTGTATAATGG-1	5.5722	6.77152	1	6W	Male	HE6W_E1	PGC	mitotic
GTCAAGTTCAATAAGG-1	2.88153	4.65654	1	6W	Male	HE6W_E1	PGC	mitotic
GTCAAGTTCGGAGGTA-1	-0.661652	0.186953	1	6W	Male	HE6W_E1	PGC	mitotic
GTCACAAGTCGGCATC-1	-4.65426	1.12481	1	6W	Male	HE6W_E1	PGC	mitotic
GTCCTCACAAGGACAC-1	-5.182	1.7499	1	6W	Male	HE6W_E1	PGC	SPARC_Pos
GTCCTCACATGGTTGT-1	1.60212	4.15439	1	6W	Male	HE6W_E1	PGC	mitotic
GTCGGGTCAATCAGAA-1	8.38879	5.69628	1	6W	Male	HE6W_E1	PGC	mitotic
GTCTTCGTCTTAGAGC-1	5.83222	6.00961	1	6W	Male	HE6W_E1	PGC	mitotic
GTGAAGGCAGCTATTG-1	2.07405	4.01096	1	6W	Male	HE6W_E1	PGC	mitotic
GTGCAGCCAGACGCAA-1	5.82595	6.35353	1	6W	Male	HE6W_E1	PGC	mitotic
GTGCATATCTGATTCT-1	1.87836	2.65826	1	6W	Male	HE6W_E1	PGC	mitotic
GTGCGGTTCCGAATGT-1	7.14389	6.55706	1	6W	Male	HE6W_E1	PGC	mitotic
GTGCGGTTCTGAGTGT-1	5.69524	6.98402	1	6W	Male	HE6W_E1	PGC	mitotic
GTGCTTCAGAGGACGG-1	6.29978	5.41748	1	6W	Male	HE6W_E1	PGC	mitotic
GTGCTTCTCCCGGATG-1	3.79775	3.89973	1	6W	Male	HE6W_E1	PGC	mitotic
GTGGGTCAGCATGGCA-1	5.46656	5.79714	1	6W	Male	HE6W_E1	PGC	mitotic
GTTAAGCTCCGGCACA-1	5.68879	6.94983	1	6W	Male	HE6W_E1	PGC	mitotic
GTTCATTAGGACCACA-1	3.33222	5.26413	1	6W	Male	HE6W_E1	PGC	mitotic
GTTCATTGTCCAGTTA-1	4.26929	4.93819	1	6W	Male	HE6W_E1	PGC	mitotic
GTTCGGGAGACAAGCC-1	4.48209	5.9671	1	6W	Male	HE6W_E1	PGC	mitotic
GTTCGGGCAATAACGA-1	4.50853	6.24386	1	6W	Male	HE6W_E1	PGC	mitotic
GTTCGGGCAGATGGCA-1	8.36214	5.62551	1	6W	Male	HE6W_E1	PGC	mitotic
GTTCGGGGTACTCGCG-1	4.85352	5.08975	1	6W	Male	HE6W_E1	PGC	mitotic
GTTCTCGCATCTATGG-1	2.67657	4.37497	1	6W	Male	HE6W_E1	PGC	mitotic
TAAACCGCAAGTTAAG-1	6.63173	6.20605	1	6W	Male	HE6W_E1	PGC	mitotic
TAAGAGAAGAGATGAG-1	6.53507	5.87379	1	6W	Male	HE6W_E1	PGC	mitotic
TAAGCGTTCATCGATG-1	7.52313	6.05828	1	6W	Male	HE6W_E1	PGC	mitotic
TAAGTGCAGGCCCTCA-1	3.33527	5.97948	1	6W	Male	HE6W_E1	PGC	mitotic
TAAGTGCCACCGATAT-1	2.16627	4.33334	1	6W	Male	HE6W_E1	PGC	mitotic
TACACGAGTTGGACCC-1	2.7838	3.50177	1	6W	Male	HE6W_E1	PGC	mitotic
TACAGTGCATCCAACA-1	2.26429	3.9837	1	6W	Male	HE6W_E1	PGC	mitotic
TACCTATGTGTATGGG-1	4.02818	4.10427	1	6W	Male	HE6W_E1	PGC	mitotic
TACCTTACACGAAACG-1	4.00816	5.51285	1	6W	Male	HE6W_E1	PGC	mitotic
TACGGATCAAAGGCGT-1	5.85053	6.43948	1	6W	Male	HE6W_E1	PGC	mitotic
TACGGATCATGGAATA-1	1.30063	3.00764	1	6W	Male	HE6W_E1	PGC	mitotic
TACGGATGTGCAACGA-1	0.146071	1.11175	1	6W	Male	HE6W_E1	PGC	mitotic
TACTCATAGTGAACAT-1	3.50405	6.05453	1	6W	Male	HE6W_E1	PGC	mitotic
TACTCATCAAGCTGAG-1	8.09879	4.60563	1	6W	Male	HE6W_E1	PGC	mitotic
TACTCATCAGCGATCC-1	1.14102	3.54804	1	6W	Male	HE6W_E1	PGC	mitotic
TACTTACGTAAAGTCA-1	4.63111	5.32188	1	6W	Male	HE6W_E1	PGC	mitotic
TACTTACGTGACTACT-1	6.89874	4.52917	1	6W	Male	HE6W_E1	PGC	mitotic
TACTTACTCGCGCCAA-1	2.50293	3.96888	1	6W	Male	HE6W_E1	PGC	mitotic
TACTTGTCATTGCGGC-1	6.32196	5.4652	1	6W	Male	HE6W_E1	PGC	mitotic
TAGAGCTGTCGACTGC-1	2.87249	4.87033	1	6W	Male	HE6W_E1	PGC	mitotic
TAGAGCTGTGAACCTT-1	4.03208	5.28074	1	6W	Male	HE6W_E1	PGC	mitotic
TAGAGCTGTGCTCTTC-1	7.07924	6.08026	1	6W	Male	HE6W_E1	PGC	mitotic
TAGGCATGTCTCGTTC-1	-0.889989	0.607139	1	6W	Male	HE6W_E1	PGC	mitotic
TAGGCATTCCTGCCAT-1	8.19219	6.00269	1	6W	Male	HE6W_E1	PGC	mitotic
TAGTGGTGTTTGGCGC-1	7.01834	5.61119	1	6W	Male	HE6W_E1	PGC	mitotic
TAGTGGTTCTAACTTC-1	3.7799	5.62106	1	6W	Male	HE6W_E1	PGC	mitotic
TAGTTGGAGATCACGG-1	1.45442	4.46407	1	6W	Male	HE6W_E1	PGC	mitotic
TATCTCAAGGAATCGC-1	4.98234	5.44027	1	6W	Male	HE6W_E1	PGC	mitotic
TATCTCAAGGCGCTCT-1	5.9159	6.05479	1	6W	Male	HE6W_E1	PGC	mitotic
TATTACCAGCCAGTAG-1	5.95332	6.11028	1	6W	Male	HE6W_E1	PGC	mitotic
TCAATCTCATCCAACA-1	3.20248	5.66986	1	6W	Male	HE6W_E1	PGC	mitotic
TCACAAGCATTGGGCC-1	7.39516	6.32573	1	6W	Male	HE6W_E1	PGC	mitotic
TCAGATGGTGATAAGT-1	6.44693	6.82573	1	6W	Male	HE6W_E1	PGC	mitotic
TCAGCAAGTATTCTCT-1	4.901	6.75352	1	6W	Male	HE6W_E1	PGC	mitotic
TCAGGATCATCACAAC-1	1.35711	4.71385	1	6W	Male	HE6W_E1	PGC	mitotic
TCATTACGTCTTTCAT-1	4.22793	4.78839	1	6W	Male	HE6W_E1	PGC	mitotic
TCCACACTCGAATGGG-1	7.64594	4.65349	1	6W	Male	HE6W_E1	PGC	mitotic
TCCACACTCTCTTATG-1	2.45198	4.51874	1	6W	Male	HE6W_E1	PGC	mitotic
TCGAGGCTCTCCAGGG-1	5.00387	5.70311	1	6W	Male	HE6W_E1	PGC	mitotic
TCGCGAGAGGCGACAT-1	2.98763	4.90348	1	6W	Male	HE6W_E1	PGC	mitotic
TCGCGTTAGCCTATGT-1	-0.810146	0.357909	1	6W	Male	HE6W_E1	PGC	mitotic
TCGCGTTAGCGCCTTG-1	-5.60453	2.06915	1	6W	Male	HE6W_E1	PGC	SPARC_Pos
TCGGGACCACGCATCG-1	8.58855	5.65809	1	6W	Male	HE6W_E1	PGC	mitotic
TCGGTAAAGATATGGT-1	1.35154	3.90776	1	6W	Male	HE6W_E1	PGC	mitotic
TCGGTAACACATCCGG-1	6.39308	6.67461	1	6W	Male	HE6W_E1	PGC	mitotic
TCGGTAAGTTATCGGT-1	-5.74459	2.14032	1	6W	Male	HE6W_E1	PGC	SPARC_Pos
TCTATTGGTACGAAAT-1	5.33295	5.39383	1	6W	Male	HE6W_E1	PGC	mitotic
TCTCATACAATCCAAC-1	4.22202	5.53987	1	6W	Male	HE6W_E1	PGC	mitotic
TCTCTAACAAGTAATG-1	0.294675	1.76094	1	6W	Male	HE6W_E1	PGC	mitotic
TCTCTAATCTTGCAAG-1	2.32494	3.67218	1	6W	Male	HE6W_E1	PGC	mitotic
TCTGGAAAGACCTTTG-1	4.24754	5.04046	1	6W	Male	HE6W_E1	PGC	mitotic
TCTTCGGAGCGTTGCC-1	4.58775	6.08316	1	6W	Male	HE6W_E1	PGC	mitotic
TCTTCGGTCGTAGATC-1	5.46882	6.90679	1	6W	Male	HE6W_E1	PGC	mitotic
TGACAACTCGTGACAT-1	-1.03233	-0.615464	1	6W	Male	HE6W_E1	PGC	Cycling
TGACGGCCACACGCTG-1	3.70444	5.26545	1	6W	Male	HE6W_E1	PGC	mitotic
TGAGAGGCAAGACGTG-1	2.80833	4.78632	1	6W	Male	HE6W_E1	PGC	mitotic
TGAGAGGTCGGAAACG-1	3.66105	6.11709	1	6W	Male	HE6W_E1	PGC	mitotic
TGAGAGGTCGTAGGTT-1	8.67451	5.51086	1	6W	Male	HE6W_E1	PGC	mitotic
TGAGAGGTCTGTGCAA-1	5.65647	6.16043	1	6W	Male	HE6W_E1	PGC	mitotic
TGAGCATGTTAAGGGC-1	-4.78726	2.87569	1	6W	Male	HE6W_E1	PGC	mitotic
TGAGCATGTTTGTTGG-1	1.88856	3.63643	1	6W	Male	HE6W_E1	PGC	mitotic
TGAGCCGCAGGGTATG-1	3.3121	5.12891	1	6W	Male	HE6W_E1	PGC	mitotic
TGCACCTAGGCGATAC-1	0.888504	0.482805	1	6W	Male	HE6W_E1	PGC	mitotic
TGCACCTCATTCCTCG-1	5.73744	6.04045	1	6W	Male	HE6W_E1	PGC	mitotic
TGCACCTGTGGCCCTA-1	6.39047	5.69364	1	6W	Male	HE6W_E1	PGC	mitotic
TGCCAAATCTTCGGTC-1	-0.0612858	1.26017	1	6W	Male	HE6W_E1	PGC	mitotic
TGCCCATGTCACACGC-1	5.52017	6.40706	1	6W	Male	HE6W_E1	PGC	mitotic
TGCCCTAGTCGACTGC-1	0.252913	1.31721	1	6W	Male	HE6W_E1	PGC	mitotic
TGCGCAGAGCGTTGCC-1	6.38911	6.39544	1	6W	Male	HE6W_E1	PGC	mitotic
TGCGCAGAGGGCACTA-1	2.07563	4.04123	1	6W	Male	HE6W_E1	PGC	mitotic
TGCGCAGTCCTAAGTG-1	6.21563	6.05535	1	6W	Male	HE6W_E1	PGC	mitotic
TGCTGCTTCGGCCGAT-1	-5.70018	1.74676	1	6W	Male	HE6W_E1	PGC	SPARC_Pos
TGGACGCAGACACGAC-1	1.17761	3.00149	1	6W	Male	HE6W_E1	PGC	mitotic
TGGACGCCATACGCTA-1	7.12092	5.86146	1	6W	Male	HE6W_E1	PGC	mitotic
TGGCCAGCAGTCCTTC-1	6.34831	4.61131	1	6W	Male	HE6W_E1	PGC	mitotic
TGGCCAGGTTGTCTTT-1	4.41683	6.6123	1	6W	Male	HE6W_E1	PGC	mitotic
TGGCGCACACCACGTG-1	3.89933	5.03222	1	6W	Male	HE6W_E1	PGC	mitotic
TGGCGCATCCTGTACC-1	2.27505	3.3613	1	6W	Male	HE6W_E1	PGC	mitotic
TGGCTGGAGAAGGTGA-1	3.64075	6.07075	1	6W	Male	HE6W_E1	PGC	mitotic
TGGGCGTAGGACGAAA-1	0.850452	3.03761	1	6W	Male	HE6W_E1	PGC	mitotic
TGGTTAGTCATGTAGC-1	2.71475	5.05934	1	6W	Male	HE6W_E1	PGC	mitotic
TGGTTCCAGAATAGGG-1	2.9955	4.56556	1	6W	Male	HE6W_E1	PGC	mitotic
TGTATTCGTCTCTTAT-1	5.05548	5.75174	1	6W	Male	HE6W_E1	PGC	mitotic
TGTCCCAGTCCTAGCG-1	5.25824	6.50673	1	6W	Male	HE6W_E1	PGC	mitotic
TTAGGCACAGTCAGAG-1	5.75241	6.08439	1	6W	Male	HE6W_E1	PGC	mitotic
TTAGGCAGTAGCTAAA-1	2.05265	4.42032	1	6W	Male	HE6W_E1	PGC	mitotic
TTAGGCATCCGAACGC-1	2.45515	4.51444	1	6W	Male	HE6W_E1	PGC	mitotic
TTATGCTAGACACGAC-1	5.46006	6.02249	1	6W	Male	HE6W_E1	PGC	mitotic
TTCCCAGTCAGGTAAA-1	5.15953	5.758	1	6W	Male	HE6W_E1	PGC	mitotic
TTCGAAGCAGATAATG-1	4.24329	6.22386	1	6W	Male	HE6W_E1	PGC	mitotic
TTCTACACACTTCGAA-1	0.392843	2.38747	1	6W	Male	HE6W_E1	PGC	mitotic
TTCTACACATGTTGAC-1	-5.22568	1.2613	1	6W	Male	HE6W_E1	PGC	SPARC_Pos
TTCTTAGAGTGATCGG-1	2.03001	4.26444	1	6W	Male	HE6W_E1	PGC	mitotic
TTCTTAGCACGGATAG-1	-4.9587	1.82207	1	6W	Male	HE6W_E1	PGC	SPARC_Pos
TTGACTTCAGGGTACA-1	2.50621	4.99575	1	6W	Male	HE6W_E1	PGC	mitotic
TTGACTTGTCAGCTAT-1	3.1402	5.34875	1	6W	Male	HE6W_E1	PGC	mitotic
TTGCCGTAGGAGTCTG-1	-5.57907	1.90586	1	6W	Male	HE6W_E1	PGC	SPARC_Pos
TTGCGTCAGTAGCCGA-1	5.97629	6.49308	1	6W	Male	HE6W_E1	PGC	mitotic
TTGCGTCCAGCTCGCA-1	5.97427	5.97838	1	6W	Male	HE6W_E1	PGC	mitotic
TTGGAACAGAGGTTGC-1	4.40616	6.1039	1	6W	Male	HE6W_E1	PGC	mitotic
TTGGAACGTCGTCTTC-1	8.13483	5.9678	1	6W	Male	HE6W_E1	PGC	mitotic
TTGGAACTCAGTGCAT-1	6.60963	6.68148	1	6W	Male	HE6W_E1	PGC	mitotic
TTGTAGGGTAGAGTGC-1	4.75186	6.73362	1	6W	Male	HE6W_E1	PGC	mitotic
TTTACTGTCACTCCTG-1	-5.29279	2.64406	1	6W	Male	HE6W_E1	PGC	SPARC_Pos
TTTGCGCTCTTGAGGT-1	2.38478	0.840562	1	6W	Male	HE6W_E1	PGC	mitotic
TTTGGTTCAATAGAGT-1	5.04393	4.51775	1	6W	Male	HE6W_E1	PGC	mitotic
TTTGGTTCAGAGCCAA-1	5.33412	4.22803	1	6W	Male	HE6W_E1	PGC	mitotic
TTTGGTTGTCAACATC-1	2.80117	4.49708	1	6W	Male	HE6W_E1	PGC	mitotic
AAAGATGTCCTCATTA-2	4.13361	5.86455	2	7W	Female	HE7W_E1	PGC	mitotic
AACACGTTCTGGTGTA-2	7.44362	6.30105	2	7W	Female	HE7W_E1	PGC	mitotic
AACCATGTCGGCGCAT-2	5.64817	6.16887	2	7W	Female	HE7W_E1	PGC	mitotic
AACTCCCAGTACGATA-2	8.69769	5.62121	2	7W	Female	HE7W_E1	PGC	mitotic
AACTCTTAGAATAGGG-2	7.10544	6.17451	2	7W	Female	HE7W_E1	PGC	mitotic
AAGACCTCACGAGGTA-2	-5.1671	2.54664	2	7W	Female	HE7W_E1	PGC	SPARC_Pos
AAGCCGCCATGCCTTC-2	-5.72512	2.21716	2	7W	Female	HE7W_E1	PGC	SPARC_Pos
AAGGAGCCACCAGTTA-2	5.70529	6.43939	2	7W	Female	HE7W_E1	PGC	mitotic
ACACTGATCCGTCAAA-2	8.23543	5.83194	2	7W	Female	HE7W_E1	PGC	mitotic
ACATACGGTAGTAGTA-2	7.64006	5.87004	2	7W	Female	HE7W_E1	PGC	mitotic
ACATCAGTCGAATGGG-2	5.86809	6.07295	2	7W	Female	HE7W_E1	PGC	mitotic
ACATGGTAGCCAGAAC-2	0.783709	2.53204	2	7W	Female	HE7W_E1	PGC	mitotic
ACCTTTACACGCCAGT-2	7.37336	6.29147	2	7W	Female	HE7W_E1	PGC	mitotic
ACCTTTAGTGTCTGAT-2	8.03946	4.97061	2	7W	Female	HE7W_E1	PGC	mitotic
ACGAGGACAAGCGATG-2	8.23208	5.90292	2	7W	Female	HE7W_E1	PGC	mitotic
ACGGAGACACAGGTTT-2	8.74776	5.5746	2	7W	Female	HE7W_E1	PGC	mitotic
ACGGAGACATCGGGTC-2	1.05266	2.76075	2	7W	Female	HE7W_E1	PGC	mitotic
ACGGGCTAGAAGGCCT-2	2.62465	4.83688	2	7W	Female	HE7W_E1	PGC	mitotic
ACGTCAAAGTTATCGC-2	6.35544	6.6374	2	7W	Female	HE7W_E1	PGC	mitotic
AGACGTTTCCGTACAA-2	7.36181	5.86106	2	7W	Female	HE7W_E1	PGC	mitotic
AGAGTGGGTGTCAATC-2	7.08254	6.26555	2	7W	Female	HE7W_E1	PGC	mitotic
AGATCTGCAGAAGCAC-2	6.32795	5.85765	2	7W	Female	HE7W_E1	PGC	mitotic
AGATCTGGTCTCTCGT-2	1.95286	4.69194	2	7W	Female	HE7W_E1	PGC	mitotic
AGATCTGTCAGCTGGC-2	5.38177	6.00817	2	7W	Female	HE7W_E1	PGC	mitotic
AGCAGCCTCGGTGTTA-2	5.77262	6.97941	2	7W	Female	HE7W_E1	PGC	mitotic
AGCATACTCCTTGCCA-2	5.39393	6.8101	2	7W	Female	HE7W_E1	PGC	mitotic
AGCGTATCACCAGTTA-2	7.24808	5.7541	2	7W	Female	HE7W_E1	PGC	mitotic
AGCGTATCATTGCGGC-2	3.18493	5.17014	2	7W	Female	HE7W_E1	PGC	mitotic
AGCTCCTGTTCCATGA-2	7.91007	6.0366	2	7W	Female	HE7W_E1	PGC	mitotic
AGCTTGATCGGCGGTT-2	5.75553	5.87304	2	7W	Female	HE7W_E1	PGC	mitotic
AGGGTGACAACTGCGC-2	7.92683	5.71581	2	7W	Female	HE7W_E1	PGC	mitotic
AGGGTGACATTCCTGC-2	2.33925	4.71033	2	7W	Female	HE7W_E1	PGC	mitotic
AGGGTGAGTAGTACCT-2	-5.39022	2.78587	2	7W	Female	HE7W_E1	PGC	SPARC_Pos
AGGTCATTCGGACAAG-2	6.81558	6.54345	2	7W	Female	HE7W_E1	PGC	mitotic
AGTTGGTTCGGCTACG-2	8.62935	5.51643	2	7W	Female	HE7W_E1	PGC	mitotic
AGTTGGTTCTGTCCGT-2	7.31501	5.76312	2	7W	Female	HE7W_E1	PGC	mitotic
ATCATCTCACAGACTT-2	5.70544	7.03239	2	7W	Female	HE7W_E1	PGC	mitotic
ATCATCTTCAACACCA-2	7.1165	6.46634	2	7W	Female	HE7W_E1	PGC	mitotic
ATCATGGCAATGCCAT-2	6.09721	6.47805	2	7W	Female	HE7W_E1	PGC	mitotic
ATCATGGCAGCTGCAC-2	3.47909	5.26343	2	7W	Female	HE7W_E1	PGC	mitotic
ATCCACCTCTAAGCCA-2	6.35147	6.81719	2	7W	Female	HE7W_E1	PGC	mitotic
ATGAGGGCAAGTACCT-2	7.23262	6.09021	2	7W	Female	HE7W_E1	PGC	mitotic
ATTACTCCATGTAGTC-2	5.98405	6.31058	2	7W	Female	HE7W_E1	PGC	mitotic
ATTATCCCACCTCGGA-2	7.54377	6.17742	2	7W	Female	HE7W_E1	PGC	mitotic
ATTGGTGAGGACAGAA-2	7.56013	6.47932	2	7W	Female	HE7W_E1	PGC	mitotic
CAAGATCTCGTGGACC-2	4.23241	6.35526	2	7W	Female	HE7W_E1	PGC	mitotic
CAAGGCCCAGTAAGAT-2	-5.30416	2.76913	2	7W	Female	HE7W_E1	PGC	SPARC_Pos
CACACAATCACCTCGT-2	8.53104	5.81676	2	7W	Female	HE7W_E1	PGC	mitotic
CACACCTAGCCTATGT-2	2.35206	6.13607	2	7W	Female	HE7W_E1	PGC	mitotic
CACATAGAGGCACATG-2	7.24997	6.51652	2	7W	Female	HE7W_E1	PGC	mitotic
CACATAGGTACTTGAC-2	4.58059	6.36063	2	7W	Female	HE7W_E1	PGC	mitotic
CACCAGGGTATATCCG-2	6.16023	4.07694	2	7W	Female	HE7W_E1	PGC	mitotic
CAGATCAAGATAGGAG-2	8.21138	5.54794	2	7W	Female	HE7W_E1	PGC	mitotic
CAGCGACGTAAGGGAA-2	7.57794	6.44686	2	7W	Female	HE7W_E1	PGC	mitotic
CAGCTAAAGTGGGTTG-2	4.80893	6.31545	2	7W	Female	HE7W_E1	PGC	mitotic
CAGGTGCGTACGAAAT-2	2.29393	3.85361	2	7W	Female	HE7W_E1	PGC	mitotic
CAGTAACCAGACGCAA-2	5.87556	6.41932	2	7W	Female	HE7W_E1	PGC	mitotic
CATATGGGTCATTAGC-2	2.65295	3.42233	2	7W	Female	HE7W_E1	PGC	mitotic
CATCAAGGTATCAGTC-2	2.29914	4.44681	2	7W	Female	HE7W_E1	PGC	mitotic
CATCAGACAGTATGCT-2	4.36489	6.52182	2	7W	Female	HE7W_E1	PGC	mitotic
CATCGAAAGGTCATCT-2	8.53546	5.65606	2	7W	Female	HE7W_E1	PGC	mitotic
CATCGGGTCGTCCGTT-2	7.49149	6.48402	2	7W	Female	HE7W_E1	PGC	mitotic
CATTATCTCAGCAACT-2	7.19398	5.46527	2	7W	Female	HE7W_E1	PGC	mitotic
CATTCGCGTGACGCCT-2	4.71413	5.61088	2	7W	Female	HE7W_E1	PGC	mitotic
CCACGGAGTCCAGTAT-2	8.71437	5.65446	2	7W	Female	HE7W_E1	PGC	mitotic
CCACTACTCGGTGTCG-2	7.77555	5.98613	2	7W	Female	HE7W_E1	PGC	mitotic
CCATGTCAGATGCGAC-2	7.31555	6.05248	2	7W	Female	HE7W_E1	PGC	mitotic
CCCATACCATCCAACA-2	7.14747	5.99703	2	7W	Female	HE7W_E1	PGC	mitotic
CCGGGATAGATCGGGT-2	7.86818	6.33424	2	7W	Female	HE7W_E1	PGC	mitotic
CCGTACTAGGCTAGGT-2	4.95096	6.38304	2	7W	Female	HE7W_E1	PGC	mitotic
CCTAAAGCATCCCATC-2	5.24889	6.00896	2	7W	Female	HE7W_E1	PGC	mitotic
CCTACACTCCGGCACA-2	7.29893	5.5764	2	7W	Female	HE7W_E1	PGC	mitotic
CCTATTACATATACGC-2	-0.882689	0.504288	2	7W	Female	HE7W_E1	PGC	mitotic
CCTTTCTCAGCTATTG-2	2.94014	4.43963	2	7W	Female	HE7W_E1	PGC	mitotic
CGACCTTGTACCAGTT-2	1.63476	3.57033	2	7W	Female	HE7W_E1	PGC	mitotic
CGAGAAGTCTGGAGCC-2	7.30008	5.61856	2	7W	Female	HE7W_E1	PGC	mitotic
CGAGCACGTCTAGTGT-2	0.152516	1.88171	2	7W	Female	HE7W_E1	PGC	mitotic
CGAGCCAAGACAGGCT-2	8.67178	5.61527	2	7W	Female	HE7W_E1	PGC	mitotic
CGATGGCCACTTCGAA-2	6.04911	6.46585	2	7W	Female	HE7W_E1	PGC	mitotic
CGCCAAGTCGTACCGG-2	7.6765	6.14687	2	7W	Female	HE7W_E1	PGC	mitotic
CGGACGTAGGTGACCA-2	8.37915	5.83672	2	7W	Female	HE7W_E1	PGC	mitotic
CGGACTGAGTGAATTG-2	7.51792	6.13983	2	7W	Female	HE7W_E1	PGC	mitotic
CGGTTAAAGTGTCCCG-2	8.65481	5.63503	2	7W	Female	HE7W_E1	PGC	mitotic
CGTAGGCGTACGACCC-2	5.23567	5.38263	2	7W	Female	HE7W_E1	PGC	mitotic
CGTCACTTCACCGGGT-2	3.55981	5.66118	2	7W	Female	HE7W_E1	PGC	mitotic
CGTCCATCACGAAATA-2	6.05046	6.08557	2	7W	Female	HE7W_E1	PGC	mitotic
CGTGTAACACCATCCT-2	7.74547	6.36748	2	7W	Female	HE7W_E1	PGC	mitotic
CGTTAGAAGACGCAAC-2	8.73665	5.58456	2	7W	Female	HE7W_E1	PGC	mitotic
CGTTGGGGTTTGACAC-2	6.58645	6.40557	2	7W	Female	HE7W_E1	PGC	mitotic
CTACATTCACGCTTTC-2	8.76724	5.46644	2	7W	Female	HE7W_E1	PGC	mitotic
CTAGTGATCTGATACG-2	7.46628	6.20143	2	7W	Female	HE7W_E1	PGC	mitotic
CTCCTAGTCAACCATG-2	6.12458	6.36581	2	7W	Female	HE7W_E1	PGC	mitotic
CTCGAGGCATCTATGG-2	8.56534	5.67696	2	7W	Female	HE7W_E1	PGC	mitotic
CTCGGAGGTTCATGGT-2	6.59816	5.84178	2	7W	Female	HE7W_E1	PGC	mitotic
CTCTACGAGTTAACGA-2	7.41225	6.13685	2	7W	Female	HE7W_E1	PGC	mitotic
CTCTACGGTAAGTTCC-2	4.79139	6.32721	2	7W	Female	HE7W_E1	PGC	mitotic
CTGAAACGTTCTGTTT-2	7.7907	5.62444	2	7W	Female	HE7W_E1	PGC	mitotic
CTGCCTACAGGGCATA-2	4.48489	5.75131	2	7W	Female	HE7W_E1	PGC	mitotic
CTGCCTACATCGGTTA-2	6.95364	6.55889	2	7W	Female	HE7W_E1	PGC	mitotic
CTGCCTATCTATCCTA-2	1.98618	3.33519	2	7W	Female	HE7W_E1	PGC	mitotic
CTGCTGTAGCCACGCT-2	7.50443	6.40471	2	7W	Female	HE7W_E1	PGC	mitotic
CTGCTGTCAAAGAATC-2	7.55153	6.47495	2	7W	Female	HE7W_E1	PGC	mitotic
CTGTGCTAGCTCAACT-2	4.96656	6.7448	2	7W	Female	HE7W_E1	PGC	mitotic
CTTACCGTCACGGTTA-2	-5.05697	2.29906	2	7W	Female	HE7W_E1	PGC	SPARC_Pos
CTTACCGTCTTCAACT-2	0.684604	4.74928	2	7W	Female	HE7W_E1	PGC	mitotic
CTTCTCTTCAGCTCGG-2	7.21604	6.2815	2	7W	Female	HE7W_E1	PGC	mitotic
GAACGGACAAGGACAC-2	3.43575	6.10182	2	7W	Female	HE7W_E1	PGC	mitotic
GAACGGACATATGAGA-2	-5.25127	2.78853	2	7W	Female	HE7W_E1	PGC	SPARC_Pos
GACAGAGAGTACGACG-2	4.77485	6.22331	2	7W	Female	HE7W_E1	PGC	mitotic
GACCAATTCACCCGAG-2	-1.35137	2.12506	2	7W	Female	HE7W_E1	PGC	mitotic
GACCTGGGTGTCAATC-2	5.68094	6.87915	2	7W	Female	HE7W_E1	PGC	mitotic
GACGCGTAGTCCATAC-2	5.85317	4.75201	2	7W	Female	HE7W_E1	PGC	mitotic
GAGCAGAAGCTGATAA-2	5.66069	6.60038	2	7W	Female	HE7W_E1	PGC	mitotic
GAGCAGACACATTTCT-2	8.19307	5.48012	2	7W	Female	HE7W_E1	PGC	mitotic
GATCGCGGTTAAGGGC-2	6.20495	6.4092	2	7W	Female	HE7W_E1	PGC	mitotic
GATGAAACATGCTAGT-2	-5.57388	1.86357	2	7W	Female	HE7W_E1	PGC	SPARC_Pos
GCAAACTGTGTAATGA-2	4.682	6.56665	2	7W	Female	HE7W_E1	PGC	mitotic
GCACTCTTCGTTTATC-2	6.33193	6.6776	2	7W	Female	HE7W_E1	PGC	mitotic
GCAGTTAGTGTTTGGT-2	6.36258	6.46167	2	7W	Female	HE7W_E1	PGC	mitotic
GCATGATAGGATGCGT-2	-5.34609	2.76708	2	7W	Female	HE7W_E1	PGC	SPARC_Pos
GCATGTAGTAAGTTCC-2	4.72927	5.91942	2	7W	Female	HE7W_E1	PGC	mitotic
GCATGTAGTCGCCATG-2	1.33475	3.69174	2	7W	Female	HE7W_E1	PGC	mitotic
GCCAAATCATCACAAC-2	2.49728	4.84726	2	7W	Female	HE7W_E1	PGC	mitotic
GCGACCAAGGTGATAT-2	4.47987	6.42779	2	7W	Female	HE7W_E1	PGC	mitotic
GCGACCATCCTAGAAC-2	7.55264	4.69568	2	7W	Female	HE7W_E1	PGC	mitotic
GCGACCATCTTAGAGC-2	6.20888	5.37176	2	7W	Female	HE7W_E1	PGC	mitotic
GCGGGTTTCGCCGTGA-2	8.48106	5.34889	2	7W	Female	HE7W_E1	PGC	mitotic
GCTCCTAGTAGCTTGT-2	7.93789	5.51748	2	7W	Female	HE7W_E1	PGC	mitotic
GCTGCTTGTAAAGGAG-2	7.11761	4.52409	2	7W	Female	HE7W_E1	PGC	mitotic
GCTTGAAAGCGATTCT-2	8.11485	6.16038	2	7W	Female	HE7W_E1	PGC	mitotic
GGAAAGCCAACACCCG-2	6.90102	4.93249	2	7W	Female	HE7W_E1	PGC	mitotic
GGACGTCAGGCCATAG-2	6.22802	6.46031	2	7W	Female	HE7W_E1	PGC	mitotic
GGCAATTCATATGCTG-2	8.68089	5.58764	2	7W	Female	HE7W_E1	PGC	mitotic
GGCTCGACATTCTCAT-2	3.924	5.05081	2	7W	Female	HE7W_E1	PGC	mitotic
GGGACCTGTCTGATTG-2	3.89636	4.70099	2	7W	Female	HE7W_E1	PGC	mitotic
GGGAGATTCGCATGGC-2	0.768525	3.13534	2	7W	Female	HE7W_E1	PGC	mitotic
GGGTCTGCATGGTCAT-2	7.48942	6.44643	2	7W	Female	HE7W_E1	PGC	mitotic
GGGTTGCTCCGTTGTC-2	3.37114	5.61042	2	7W	Female	HE7W_E1	PGC	mitotic
GGTGTTACAGTGGGAT-2	6.57881	6.76238	2	7W	Female	HE7W_E1	PGC	mitotic
GTAACGTAGACAAGCC-2	5.67837	6.74525	2	7W	Female	HE7W_E1	PGC	mitotic
GTAACGTTCCATTCTA-2	-5.71286	1.98421	2	7W	Female	HE7W_E1	PGC	SPARC_Pos
GTACGTAGTCAGGACA-2	4.8666	6.68598	2	7W	Female	HE7W_E1	PGC	mitotic
GTAGGCCAGACATAAC-2	3.55179	5.18443	2	7W	Female	HE7W_E1	PGC	mitotic
GTCACGGGTGGCAAAC-2	8.25642	5.92239	2	7W	Female	HE7W_E1	PGC	mitotic
GTCTCGTAGTATTGGA-2	-0.795994	3.66468	2	7W	Female	HE7W_E1	PGC	mitotic
GTGCATATCAACACGT-2	6.97208	6.55256	2	7W	Female	HE7W_E1	PGC	mitotic
GTGCGGTGTTCAGCGC-2	8.8341	5.04775	2	7W	Female	HE7W_E1	PGC	mitotic
GTGCTTCTCGTTTGCC-2	0.123462	1.08961	2	7W	Female	HE7W_E1	PGC	mitotic
GTGTGCGAGCGGATCA-2	8.60514	5.7122	2	7W	Female	HE7W_E1	PGC	mitotic
GTGTGCGGTCCGAACC-2	3.62275	5.96404	2	7W	Female	HE7W_E1	PGC	mitotic
GTTCATTTCCGAGCCA-2	-4.98887	2.86836	2	7W	Female	HE7W_E1	PGC	SPARC_Pos
TACACGACATCTACGA-2	7.11756	6.58075	2	7W	Female	HE7W_E1	PGC	mitotic
TACGGGCGTCTTTCAT-2	8.41632	5.5662	2	7W	Female	HE7W_E1	PGC	mitotic
TAGAGCTAGCGTGAAC-2	7.20063	5.51391	2	7W	Female	HE7W_E1	PGC	mitotic
TAGTGGTAGAGAGCTC-2	6.34649	6.8796	2	7W	Female	HE7W_E1	PGC	mitotic
TATTACCAGGCAGGTT-2	6.50185	6.42784	2	7W	Female	HE7W_E1	PGC	mitotic
TATTACCCAATGTTGC-2	5.4184	6.07275	2	7W	Female	HE7W_E1	PGC	mitotic
TCACAAGAGCTCCTTC-2	7.55814	6.36431	2	7W	Female	HE7W_E1	PGC	mitotic
TCAGCTCTCTCGTTTA-2	7.47844	6.25498	2	7W	Female	HE7W_E1	PGC	mitotic
TCGCGAGTCGCGCCAA-2	7.29276	4.56413	2	7W	Female	HE7W_E1	PGC	mitotic
TCGCGTTAGATGCCTT-2	-5.531	2.88739	2	7W	Female	HE7W_E1	PGC	SPARC_Pos
TCGTACCCACGTAAGG-2	3.2586	5.82147	2	7W	Female	HE7W_E1	PGC	mitotic
TCTGAGAGTGTTGAGG-2	3.07478	5.24291	2	7W	Female	HE7W_E1	PGC	mitotic
TGAAAGAAGCCGCCTA-2	8.74078	5.6162	2	7W	Female	HE7W_E1	PGC	mitotic
TGAGAGGCAGATAATG-2	4.38521	5.81157	2	7W	Female	HE7W_E1	PGC	mitotic
TGAGCATGTATATGGA-2	-4.97079	2.82524	2	7W	Female	HE7W_E1	PGC	SPARC_Pos
TGATTTCGTTTGGCGC-2	5.91064	6.38681	2	7W	Female	HE7W_E1	PGC	mitotic
TGCACCTCATCTATGG-2	4.93481	4.77403	2	7W	Female	HE7W_E1	PGC	mitotic
TGCGCAGAGTGTGAAT-2	6.02231	6.60402	2	7W	Female	HE7W_E1	PGC	mitotic
TGCTACCAGCCCTAAT-2	-5.81658	2.07035	2	7W	Female	HE7W_E1	PGC	SPARC_Pos
TGCTACCTCGGTCCGA-2	5.66315	6.74313	2	7W	Female	HE7W_E1	PGC	mitotic
TGCTGCTAGCGATAGC-2	-5.23006	2.73621	2	7W	Female	HE7W_E1	PGC	SPARC_Pos
TGGCGCAGTTCAGTAC-2	4.09249	6.57668	2	7W	Female	HE7W_E1	PGC	mitotic
TGGTTAGAGGTAGCCA-2	7.11481	6.14908	2	7W	Female	HE7W_E1	PGC	mitotic
TGGTTCCTCACTTACT-2	4.86794	6.0682	2	7W	Female	HE7W_E1	PGC	mitotic
TGTATTCAGCTCCTTC-2	6.51445	6.02131	2	7W	Female	HE7W_E1	PGC	mitotic
TGTATTCCATACCATG-2	4.41864	6.50189	2	7W	Female	HE7W_E1	PGC	mitotic
TGTGGTAAGGCTCAGA-2	7.36737	6.45968	2	7W	Female	HE7W_E1	PGC	mitotic
TGTGTTTAGCTAGGCA-2	7.63139	6.42279	2	7W	Female	HE7W_E1	PGC	mitotic
TTAACTCCACGGATAG-2	-5.72163	2.36441	2	7W	Female	HE7W_E1	PGC	SPARC_Pos
TTAACTCGTCGAGTTT-2	3.89744	3.65967	2	7W	Female	HE7W_E1	PGC	mitotic
TTAGGCACACCACCAG-2	0.505235	2.58308	2	7W	Female	HE7W_E1	PGC	mitotic
TTAGTTCGTCTCTCGT-2	8.59305	5.6174	2	7W	Female	HE7W_E1	PGC	mitotic
TTCGAAGGTCGGCTCA-2	2.6854	4.7432	2	7W	Female	HE7W_E1	PGC	mitotic
TTCTACACACTTAACG-2	6.04125	6.33623	2	7W	Female	HE7W_E1	PGC	mitotic
TTCTTAGGTATAGGTA-2	1.09951	5.14123	2	7W	Female	HE7W_E1	PGC	mitotic
TTGACTTCATCGGACC-2	-4.94207	1.22756	2	7W	Female	HE7W_E1	PGC	SPARC_Pos
TTGGAACAGGAATCGC-2	6.27308	6.57303	2	7W	Female	HE7W_E1	PGC	mitotic
TTGGAACGTATGCTTG-2	4.76345	6.25898	2	7W	Female	HE7W_E1	PGC	mitotic
TTTACTGTCCCTAATT-2	-5.71779	2.10533	2	7W	Female	HE7W_E1	PGC	SPARC_Pos
TTTATGCAGAAACGCC-2	-5.52399	2.93636	2	7W	Female	HE7W_E1	PGC	SPARC_Pos
TTTGGTTAGCGCCTTG-2	5.90865	6.10304	2	7W	Female	HE7W_E1	PGC	mitotic
AAACGGGTCACTCCTG-3	-1.19437	6.0632	3	7W	Male	HE7W_ME1	PGC	mitotic
AAAGATGAGAGCAATT-3	1.04275	5.45734	3	7W	Male	HE7W_ME1	PGC	mitotic
AACACGTTCCGTAGTA-3	-1.3861	5.97463	3	7W	Male	HE7W_ME1	PGC	mitotic
AAGGTTCCAATGTAAG-3	-0.297918	5.59439	3	7W	Male	HE7W_ME1	PGC	mitotic
AATCGGTTCGGTCCGA-3	0.496374	5.06685	3	7W	Male	HE7W_ME1	PGC	mitotic
ACACCAACAGCTCCGA-3	-1.76011	6.03323	3	7W	Male	HE7W_ME1	PGC	Cycling
ACACCAAGTCTTTCAT-3	-1.60108	6.13186	3	7W	Male	HE7W_ME1	PGC	mitotic
ACAGCCGAGAACTGTA-3	-1.24644	5.82483	3	7W	Male	HE7W_ME1	PGC	mitotic
ACAGCCGAGGCGACAT-3	0.0731578	4.1407	3	7W	Male	HE7W_ME1	PGC	mitotic
ACGCCAGCATTCGACA-3	-3.81986	-1.06567	3	7W	Male	HE7W_ME1	PGC	Cycling
ACGGGCTAGTTGAGAT-3	-0.323027	5.77694	3	7W	Male	HE7W_ME1	PGC	mitotic
ACGGGTCAGTACACCT-3	-1.65887	6.09647	3	7W	Male	HE7W_ME1	PGC	mitotic
ACGGGTCGTATTAGCC-3	0.480276	4.73456	3	7W	Male	HE7W_ME1	PGC	mitotic
ACTGAACCATATACGC-3	-0.577793	6.18772	3	7W	Male	HE7W_ME1	PGC	mitotic
ACTTACTCAGGATTGG-3	-1.5827	6.10071	3	7W	Male	HE7W_ME1	PGC	mitotic
AGCGGTCCATGGTCAT-3	-0.986673	6.19053	3	7W	Male	HE7W_ME1	PGC	mitotic
AGGGTGACAGGTCGTC-3	-0.277888	5.54224	3	7W	Male	HE7W_ME1	PGC	mitotic
AGTAGTCAGGGATGGG-3	-0.884282	6.17644	3	7W	Male	HE7W_ME1	PGC	mitotic
AGTTGGTAGACGACGT-3	-0.00392836	5.1152	3	7W	Male	HE7W_ME1	PGC	mitotic
ATCCGAACAGATCGGA-3	0.631717	4.91659	3	7W	Male	HE7W_ME1	PGC	mitotic
ATCGAGTTCGGTCCGA-3	-0.776789	6.15561	3	7W	Male	HE7W_ME1	PGC	mitotic
ATTATCCGTCTAGCCG-3	7.15413	5.75301	3	7W	Male	HE7W_ME1	PGC	mitotic
CAACCTCGTCTTTCAT-3	0.44456	5.02549	3	7W	Male	HE7W_ME1	PGC	mitotic
CAAGAAAGTTACTGAC-3	-0.564124	6.20668	3	7W	Male	HE7W_ME1	PGC	mitotic
CAAGGCCTCCAGTATG-3	-0.310044	5.71466	3	7W	Male	HE7W_ME1	PGC	mitotic
CAAGTTGAGCTCCTTC-3	0.497387	4.78256	3	7W	Male	HE7W_ME1	PGC	mitotic
CACAGGCAGTGGCACA-3	0.918316	5.11747	3	7W	Male	HE7W_ME1	PGC	mitotic
CACAGTACACCTATCC-3	1.99032	5.66385	3	7W	Male	HE7W_ME1	PGC	mitotic
CACATAGAGACTAAGT-3	-0.741275	6.2213	3	7W	Male	HE7W_ME1	PGC	mitotic
CACATAGAGCGATATA-3	-0.706136	5.92815	3	7W	Male	HE7W_ME1	PGC	mitotic
CAGCAGCTCGTTACAG-3	1.08039	4.87303	3	7W	Male	HE7W_ME1	PGC	mitotic
CAGCTGGGTGGTACAG-3	-1.56967	6.16304	3	7W	Male	HE7W_ME1	PGC	mitotic
CATATTCAGGATGTAT-3	-0.589897	5.77862	3	7W	Male	HE7W_ME1	PGC	mitotic
CATGCCTTCTTCCTTC-3	0.0776113	4.68206	3	7W	Male	HE7W_ME1	PGC	mitotic
CCATTCGAGTCACGCC-3	0.963057	4.86914	3	7W	Male	HE7W_ME1	PGC	mitotic
CCCATACGTAGGGTAC-3	-1.58026	6.05292	3	7W	Male	HE7W_ME1	PGC	mitotic
CCCTCCTCAAGCCGCT-3	0.943241	5.03046	3	7W	Male	HE7W_ME1	PGC	mitotic
CCTAGCTGTTGGTTTG-3	-0.608393	6.20912	3	7W	Male	HE7W_ME1	PGC	mitotic
CCTCAGTTCGAGGTAG-3	-0.0270352	5.03373	3	7W	Male	HE7W_ME1	PGC	mitotic
CGACCTTGTCTTCAAG-3	1.65147	4.79809	3	7W	Male	HE7W_ME1	PGC	mitotic
CGATCGGAGAGGTTAT-3	0.340749	4.49116	3	7W	Male	HE7W_ME1	PGC	mitotic
CGCCAAGCACTACAGT-3	-0.136929	5.43749	3	7W	Male	HE7W_ME1	PGC	mitotic
CGCGTTTGTTATGTGC-3	0.88799	5.09266	3	7W	Male	HE7W_ME1	PGC	mitotic
CGTCACTTCTCTAGGA-3	-0.70715	6.11806	3	7W	Male	HE7W_ME1	PGC	mitotic
CGTCCATGTCGATTGT-3	2.2205	6.04631	3	7W	Male	HE7W_ME1	PGC	mitotic
CGTTGGGAGTCTCCTC-3	-0.869716	6.13985	3	7W	Male	HE7W_ME1	PGC	mitotic
CTCTACGGTAGAGCTG-3	1.88867	6.01785	3	7W	Male	HE7W_ME1	PGC	mitotic
CTGCTGTAGATGGCGT-3	0.980822	5.22004	3	7W	Male	HE7W_ME1	PGC	mitotic
CTGTTTAAGTACGCCC-3	2.29208	6.10644	3	7W	Male	HE7W_ME1	PGC	mitotic
CTTCTCTCATACTACG-3	-0.106171	4.71085	3	7W	Male	HE7W_ME1	PGC	mitotic
CTTCTCTTCCAGAGGA-3	0.057532	4.23985	3	7W	Male	HE7W_ME1	PGC	mitotic
GAAACTCAGATAGTCA-3	2.14278	6.09319	3	7W	Male	HE7W_ME1	PGC	mitotic
GAAATGACAGCATACT-3	2.95383	6.10112	3	7W	Male	HE7W_ME1	PGC	mitotic
GACAGAGGTTCGCGAC-3	1.28747	5.75466	3	7W	Male	HE7W_ME1	PGC	mitotic
GACCAATGTATTAGCC-3	-1.39186	5.98423	3	7W	Male	HE7W_ME1	PGC	mitotic
GACGTGCTCTGAGGGA-3	0.712616	4.77384	3	7W	Male	HE7W_ME1	PGC	mitotic
GACGTTATCGTGACAT-3	0.915384	5.16648	3	7W	Male	HE7W_ME1	PGC	mitotic
GACTGCGAGTGAACAT-3	-0.84292	6.18754	3	7W	Male	HE7W_ME1	PGC	mitotic
GAGCAGATCTGTTTGT-3	0.415491	4.34473	3	7W	Male	HE7W_ME1	PGC	mitotic
GAGTCCGTCTAGAGTC-3	0.520444	5.3664	3	7W	Male	HE7W_ME1	PGC	mitotic
GATCAGTCAAATCCGT-3	-0.843042	6.14506	3	7W	Male	HE7W_ME1	PGC	mitotic
GATCGCGAGGGATGGG-3	-0.0607732	5.45102	3	7W	Male	HE7W_ME1	PGC	mitotic
GATCTAGTCACTTACT-3	-1.13837	6.01395	3	7W	Male	HE7W_ME1	PGC	mitotic
GCACATAAGCGTTTAC-3	0.581639	4.75394	3	7W	Male	HE7W_ME1	PGC	mitotic
GCCTCTAAGTCCATAC-3	-1.11433	5.98477	3	7W	Male	HE7W_ME1	PGC	mitotic
GCGACCACAGGGTTAG-3	-0.619932	6.16392	3	7W	Male	HE7W_ME1	PGC	mitotic
GCGCGATGTCTTCGTC-3	0.229114	5.70802	3	7W	Male	HE7W_ME1	PGC	mitotic
GCGGGTTGTAGCGCTC-3	-1.36008	5.97258	3	7W	Male	HE7W_ME1	PGC	mitotic
GCTTGAAAGGTGCACA-3	-4.99799	1.25502	3	7W	Male	HE7W_ME1	PGC	SPARC_Pos
GGACAGACACATTAGC-3	-1.55099	6.09473	3	7W	Male	HE7W_ME1	PGC	mitotic
GGATGTTAGCGATAGC-3	-0.407386	6.06875	3	7W	Male	HE7W_ME1	PGC	mitotic
GGCAATTCATTTCACT-3	1.03361	5.16755	3	7W	Male	HE7W_ME1	PGC	mitotic
GGCGACTTCAGGCGAA-3	0.170479	5.18678	3	7W	Male	HE7W_ME1	PGC	mitotic
GGCGTGTAGCGTAATA-3	0.836902	5.18636	3	7W	Male	HE7W_ME1	PGC	mitotic
GGGACCTAGAATTCCC-3	-5.04715	1.85881	3	7W	Male	HE7W_ME1	PGC	SPARC_Pos
GTAACGTGTTGTGGCC-3	4.53505	6.62218	3	7W	Male	HE7W_ME1	PGC	mitotic
GTAACGTTCCGCATCT-3	0.207364	5.00875	3	7W	Male	HE7W_ME1	PGC	mitotic
GTACTCCTCCGTTGTC-3	-0.186661	5.33265	3	7W	Male	HE7W_ME1	PGC	mitotic
GTGAAGGTCGCCGTGA-3	-0.732063	6.2255	3	7W	Male	HE7W_ME1	PGC	mitotic
GTGTTAGAGTTGCAGG-3	-0.28792	5.72676	3	7W	Male	HE7W_ME1	PGC	mitotic
GTTCATTAGAGCAATT-3	-5.41402	1.37911	3	7W	Male	HE7W_ME1	PGC	SPARC_Pos
TACACGATCTCGTTTA-3	-0.256279	4.681	3	7W	Male	HE7W_ME1	PGC	mitotic
TACAGTGAGACTGTAA-3	2.54593	6.09463	3	7W	Male	HE7W_ME1	PGC	mitotic
TACGGGCGTGTGTGCC-3	-5.79978	1.78613	3	7W	Male	HE7W_ME1	PGC	SPARC_Pos
TACTTGTCACCGCTAG-3	0.819228	3.47283	3	7W	Male	HE7W_ME1	PGC	mitotic
TAGGCATCATACAGCT-3	2.10361	6.06744	3	7W	Male	HE7W_ME1	PGC	mitotic
TAGTGGTGTGTCGCTG-3	0.953736	5.18318	3	7W	Male	HE7W_ME1	PGC	mitotic
TATCAGGAGTCGTTTG-3	0.622793	5.07473	3	7W	Male	HE7W_ME1	PGC	mitotic
TCAGATGCATGGTCAT-3	-0.185015	5.61562	3	7W	Male	HE7W_ME1	PGC	mitotic
TCATTTGGTAAGAGGA-3	1.24244	4.55327	3	7W	Male	HE7W_ME1	PGC	mitotic
TCGCGTTCATTGGTAC-3	-0.176207	5.47353	3	7W	Male	HE7W_ME1	PGC	mitotic
TCGTACCCAGCGTAAG-3	1.69128	5.85546	3	7W	Male	HE7W_ME1	PGC	mitotic
TCTATTGAGCTACCGC-3	-0.77207	6.17886	3	7W	Male	HE7W_ME1	PGC	mitotic
TCTATTGCAGGCGATA-3	-1.46897	5.76766	3	7W	Male	HE7W_ME1	PGC	mitotic
TCTTTCCCACCCAGTG-3	3.27297	4.96213	3	7W	Male	HE7W_ME1	PGC	mitotic
TGACTAGTCGAATGGG-3	0.496016	4.62447	3	7W	Male	HE7W_ME1	PGC	mitotic
TGCACCTGTCGAGTTT-3	-1.53307	6.13538	3	7W	Male	HE7W_ME1	PGC	mitotic
TGCCCTACACCGGAAA-3	0.105299	4.49296	3	7W	Male	HE7W_ME1	PGC	mitotic
TGCGTGGTCCTATGTT-3	0.919033	5.46534	3	7W	Male	HE7W_ME1	PGC	mitotic
TGGACGCTCGACGGAA-3	1.03795	5.14325	3	7W	Male	HE7W_ME1	PGC	mitotic
TGGCTGGGTAACGCGA-3	-0.151026	5.47323	3	7W	Male	HE7W_ME1	PGC	mitotic
TTAGGCATCCTTTACA-3	0.940614	5.20845	3	7W	Male	HE7W_ME1	PGC	mitotic
TTATGCTCATAAAGGT-3	-0.274855	6.01676	3	7W	Male	HE7W_ME1	PGC	mitotic
TTCGGTCCACTTCTGC-3	-1.66478	6.14379	3	7W	Male	HE7W_ME1	PGC	mitotic
TTCTACATCGTCCGTT-3	-1.57936	6.17761	3	7W	Male	HE7W_ME1	PGC	mitotic
TTCTCAAAGTATCGAA-3	0.810885	5.12028	3	7W	Male	HE7W_ME1	PGC	mitotic
TTGAACGGTAGAAGGA-3	-1.21179	6.03061	3	7W	Male	HE7W_ME1	PGC	mitotic
TTGTAGGTCTTCATGT-3	0.90524	5.3056	3	7W	Male	HE7W_ME1	PGC	mitotic
TTTGCGCTCGGTCCGA-3	-1.45278	6.11728	3	7W	Male	HE7W_ME1	PGC	mitotic
TTTGGTTCAGACTCGC-3	2.20961	6.10262	3	7W	Male	HE7W_ME1	PGC	mitotic
TTTGTCAAGCTGCCCA-3	-0.46541	4.97111	3	7W	Male	HE7W_ME1	PGC	mitotic
AAACCTGTCACCTTAT-4	1.55403	5.87843	4	7W	Female	HE7W_FE1	PGC	mitotic
AAAGCAAAGTAGGTGC-4	-0.878166	5.88185	4	7W	Female	HE7W_FE1	PGC	mitotic
AAAGCAAGTATAGTAG-4	-0.329247	4.56153	4	7W	Female	HE7W_FE1	PGC	mitotic
AAAGTAGTCGTCCGTT-4	-0.920659	5.75252	4	7W	Female	HE7W_FE1	PGC	mitotic
AAATGCCAGGGCACTA-4	2.16605	6.14196	4	7W	Female	HE7W_FE1	PGC	mitotic
AACGTTGGTCATCGGC-4	1.36048	5.81267	4	7W	Female	HE7W_FE1	PGC	mitotic
AAGGTTCGTCAAAGAT-4	-0.313255	4.24042	4	7W	Female	HE7W_FE1	PGC	mitotic
ACACCCTTCGAGAGCA-4	-4.78227	1.00579	4	7W	Female	HE7W_FE1	PGC	SPARC_Pos
ACAGCCGGTCGCGAAA-4	-0.707655	5.14841	4	7W	Female	HE7W_FE1	PGC	mitotic
ACCAGTATCAGCCTAA-4	-0.310734	4.73031	4	7W	Female	HE7W_FE1	PGC	mitotic
ACCGTAACAGATCGGA-4	-5.63992	1.87966	4	7W	Female	HE7W_FE1	PGC	SPARC_Pos
ACCTTTACATCCCACT-4	0.965288	5.36497	4	7W	Female	HE7W_FE1	PGC	mitotic
ACGAGCCAGTCCATAC-4	-0.107976	5.09121	4	7W	Female	HE7W_FE1	PGC	mitotic
ACGATACCATCCGGGT-4	-4.99286	1.61147	4	7W	Female	HE7W_FE1	PGC	SPARC_Pos
ACGATACTCTTGCAAG-4	-0.925085	5.39524	4	7W	Female	HE7W_FE1	PGC	mitotic
ACGTCAATCTCGCTTG-4	-1.00296	5.43995	4	7W	Female	HE7W_FE1	PGC	mitotic
ACTTACTCAATAGAGT-4	-0.131057	5.3442	4	7W	Female	HE7W_FE1	PGC	mitotic
AGAGCTTAGGTGGGTT-4	-1.12968	5.52368	4	7W	Female	HE7W_FE1	PGC	mitotic
AGAGCTTCACAAGCCC-4	0.00485786	4.58516	4	7W	Female	HE7W_FE1	PGC	mitotic
AGCATACCAGTACACT-4	0.103027	4.6876	4	7W	Female	HE7W_FE1	PGC	mitotic
AGCTTGATCGTTACAG-4	-0.0641062	4.92538	4	7W	Female	HE7W_FE1	PGC	mitotic
AGTGTCATCCGTTGCT-4	-1.03165	5.48671	4	7W	Female	HE7W_FE1	PGC	mitotic
ATAAGAGGTTATCCGA-4	1.05693	5.58509	4	7W	Female	HE7W_FE1	PGC	mitotic
ATCCACCTCACCTCGT-4	1.33382	5.75162	4	7W	Female	HE7W_FE1	PGC	mitotic
ATTATCCTCTGCCCTA-4	-1.04968	5.57987	4	7W	Female	HE7W_FE1	PGC	mitotic
CAACCAAAGTTAGCGG-4	-0.838076	5.33608	4	7W	Female	HE7W_FE1	PGC	mitotic
CAAGAAATCTCGCTTG-4	-0.26162	4.57476	4	7W	Female	HE7W_FE1	PGC	mitotic
CACACCTAGCGATGAC-4	0.585946	5.72595	4	7W	Female	HE7W_FE1	PGC	mitotic
CACCTTGCAACTTGAC-4	-1.19495	5.6569	4	7W	Female	HE7W_FE1	PGC	mitotic
CACTCCAGTCAAGCGA-4	0.501023	4.91761	4	7W	Female	HE7W_FE1	PGC	mitotic
CAGAATCAGCATGGCA-4	-1.07005	5.94629	4	7W	Female	HE7W_FE1	PGC	mitotic
CAGCTGGCAGGCGATA-4	-0.105956	5.16044	4	7W	Female	HE7W_FE1	PGC	mitotic
CAGGTGCGTTCACCTC-4	-0.40337	4.96864	4	7W	Female	HE7W_FE1	PGC	mitotic
CAGTAACTCTTAGCCC-4	-2.53642	-3.83516	4	7W	Female	HE7W_FE1	PGC	Cycling
CATGACAAGAGCAATT-4	2.13092	6.06036	4	7W	Female	HE7W_FE1	PGC	mitotic
CCCAATCTCAGCGATT-4	-0.508673	5.11205	4	7W	Female	HE7W_FE1	PGC	mitotic
CCTTCGAAGATCTGCT-4	-0.131527	4.79959	4	7W	Female	HE7W_FE1	PGC	mitotic
CGCTTCATCCCGACTT-4	-4.82373	1.27721	4	7W	Female	HE7W_FE1	PGC	SPARC_Pos
CGGACACAGTATCGAA-4	-1.04297	5.75235	4	7W	Female	HE7W_FE1	PGC	mitotic
CGGACGTGTGATAAAC-4	1.93589	5.64438	4	7W	Female	HE7W_FE1	PGC	mitotic
CGGACTGAGTATTGGA-4	-1.15912	5.67663	4	7W	Female	HE7W_FE1	PGC	mitotic
CGTAGGCTCTGGTTCC-4	0.213362	5.04882	4	7W	Female	HE7W_FE1	PGC	mitotic
CGTGAGCTCTTGCAAG-4	0.611586	4.84319	4	7W	Female	HE7W_FE1	PGC	mitotic
CGTTAGAAGTTGCAGG-4	-0.646429	5.36616	4	7W	Female	HE7W_FE1	PGC	mitotic
CTAACTTCATATACCG-4	1.02038	5.53258	4	7W	Female	HE7W_FE1	PGC	mitotic
CTACACCCAAGAGGCT-4	0.175513	5.75377	4	7W	Female	HE7W_FE1	PGC	mitotic
CTACACCCATCCCATC-4	-0.144793	4.48016	4	7W	Female	HE7W_FE1	PGC	mitotic
CTACATTAGCGTTCCG-4	2.07407	6.08464	4	7W	Female	HE7W_FE1	PGC	mitotic
CTACCCAGTGCAGGTA-4	0.340602	5.70336	4	7W	Female	HE7W_FE1	PGC	mitotic
CTACGTCAGTACGACG-4	-0.221451	4.53437	4	7W	Female	HE7W_FE1	PGC	mitotic
CTAGCCTTCAGTCCCT-4	0.0393541	5.79774	4	7W	Female	HE7W_FE1	PGC	mitotic
CTGTGCTCAGAGTGTG-4	0.238949	4.71398	4	7W	Female	HE7W_FE1	PGC	mitotic
CTGTGCTTCCGAATGT-4	-0.130586	4.56197	4	7W	Female	HE7W_FE1	PGC	mitotic
CTTGGCTGTTGTACAC-4	-0.209618	4.49633	4	7W	Female	HE7W_FE1	PGC	mitotic
GACACGCCATACAGCT-4	0.133811	4.59419	4	7W	Female	HE7W_FE1	PGC	mitotic
GACACGCCATCTCGCT-4	-5.01663	1.57493	4	7W	Female	HE7W_FE1	PGC	SPARC_Pos
GACACGCGTTTGCATG-4	-0.822288	5.11617	4	7W	Female	HE7W_FE1	PGC	mitotic
GACGTGCTCAAACGGG-4	-0.90592	5.4152	4	7W	Female	HE7W_FE1	PGC	mitotic
GACTACAAGGCAGTCA-4	-1.34812	5.85095	4	7W	Female	HE7W_FE1	PGC	mitotic
GATCTAGCATACTACG-4	-0.636339	4.97991	4	7W	Female	HE7W_FE1	PGC	mitotic
GCAATCACACGTAAGG-4	-0.184192	4.83072	4	7W	Female	HE7W_FE1	PGC	mitotic
GCATGATTCGTTACGA-4	-0.0813743	4.34799	4	7W	Female	HE7W_FE1	PGC	mitotic
GCGAGAAGTGCGATAG-4	-5.04481	1.64272	4	7W	Female	HE7W_FE1	PGC	SPARC_Pos
GCGCGATAGATACACA-4	-0.225773	4.46713	4	7W	Female	HE7W_FE1	PGC	mitotic
GCTGCAGGTGACGGTA-4	-5.35894	1.6447	4	7W	Female	HE7W_FE1	PGC	SPARC_Pos
GCTGCTTCAATAGCGG-4	-0.834455	5.31906	4	7W	Female	HE7W_FE1	PGC	mitotic
GCTGGGTTCCTGTACC-4	-1.17975	5.62698	4	7W	Female	HE7W_FE1	PGC	mitotic
GGAATAAGTTTCGCTC-4	-1.11469	5.59626	4	7W	Female	HE7W_FE1	PGC	mitotic
GGACAGAAGCCTCGTG-4	0.707706	5.02199	4	7W	Female	HE7W_FE1	PGC	mitotic
GGATGTTAGTACATGA-4	-0.0723707	4.67242	4	7W	Female	HE7W_FE1	PGC	mitotic
GGCAATTGTACCCAAT-4	-5.06278	1.62293	4	7W	Female	HE7W_FE1	PGC	SPARC_Pos
GGGACCTCAGGCTCAC-4	-1.14417	5.73707	4	7W	Female	HE7W_FE1	PGC	mitotic
GGGACCTTCAGTGTTG-4	-1.02539	5.43597	4	7W	Female	HE7W_FE1	PGC	mitotic
GGGATGAAGAGTACAT-4	1.37891	5.78284	4	7W	Female	HE7W_FE1	PGC	mitotic
GGGCACTGTCTAACGT-4	-0.72035	6.24302	4	7W	Female	HE7W_FE1	PGC	mitotic
GGGTCTGAGCCTATGT-4	0.732274	4.95081	4	7W	Female	HE7W_FE1	PGC	mitotic
GGGTTGCAGTACGTAA-4	-0.263612	5.18584	4	7W	Female	HE7W_FE1	PGC	mitotic
GGGTTGCCAATCACAC-4	0.000535243	4.58466	4	7W	Female	HE7W_FE1	PGC	mitotic
GGGTTGCGTTGCGCAC-4	-0.837565	5.80879	4	7W	Female	HE7W_FE1	PGC	mitotic
GTATTCTAGGGCACTA-4	-0.497977	4.76617	4	7W	Female	HE7W_FE1	PGC	mitotic
GTCAAGTAGTGGTAGC-4	-1.15703	5.80658	4	7W	Female	HE7W_FE1	PGC	mitotic
GTCTTCGAGAGCTGCA-4	-0.934686	5.74659	4	7W	Female	HE7W_FE1	PGC	mitotic
GTTCATTAGGAGTAGA-4	0.473051	4.7243	4	7W	Female	HE7W_FE1	PGC	mitotic
GTTCGGGGTACAGACG-4	1.00082	5.25962	4	7W	Female	HE7W_FE1	PGC	mitotic
GTTCGGGTCTTCCTTC-4	-0.20712	4.77747	4	7W	Female	HE7W_FE1	PGC	mitotic
TAAGCGTAGGCACATG-4	-0.243107	4.54307	4	7W	Female	HE7W_FE1	PGC	mitotic
TACACGAAGGCGATAC-4	2.05551	6.00721	4	7W	Female	HE7W_FE1	PGC	mitotic
TACTTGTGTCGGATCC-4	-0.937513	5.5433	4	7W	Female	HE7W_FE1	PGC	mitotic
TAGACCAGTACAGTGG-4	0.258824	4.65626	4	7W	Female	HE7W_FE1	PGC	mitotic
TAGACCAGTTCGTGAT-4	-0.121225	4.47696	4	7W	Female	HE7W_FE1	PGC	mitotic
TATCTCACAGGTCCAC-4	-1.33994	5.9324	4	7W	Female	HE7W_FE1	PGC	mitotic
TCACAAGCAGGGCATA-4	-0.148466	4.65043	4	7W	Female	HE7W_FE1	PGC	mitotic
TCACAAGGTGGTTTCA-4	-0.178132	5.05355	4	7W	Female	HE7W_FE1	PGC	mitotic
TCACGAATCATCGGAT-4	-0.447332	4.89867	4	7W	Female	HE7W_FE1	PGC	mitotic
TCAGCTCCAGCCTATA-4	0.285818	4.6238	4	7W	Female	HE7W_FE1	PGC	mitotic
TCATTACAGCTCTCGG-4	0.954267	5.38802	4	7W	Female	HE7W_FE1	PGC	mitotic
TCATTACTCACATGCA-4	0.624042	5.69216	4	7W	Female	HE7W_FE1	PGC	mitotic
TCATTTGTCAACGCTA-4	-1.32226	6.08741	4	7W	Female	HE7W_FE1	PGC	mitotic
TCCACACAGCGTTCCG-4	0.0635926	4.36181	4	7W	Female	HE7W_FE1	PGC	mitotic
TCCCGATGTCAGAAGC-4	-0.50083	4.62623	4	7W	Female	HE7W_FE1	PGC	mitotic
TCGGGACGTATTCTCT-4	-1.05037	5.49037	4	7W	Female	HE7W_FE1	PGC	mitotic
TCTATTGTCACGGTTA-4	-0.989996	6.13351	4	7W	Female	HE7W_FE1	PGC	mitotic
TCTCATAGTGCCTGTG-4	-5.03919	1.74553	4	7W	Female	HE7W_FE1	PGC	SPARC_Pos
TGACGGCTCCACGAAT-4	8.51562	5.83769	4	7W	Female	HE7W_FE1	PGC	mitotic
TGACTTTTCCTCATTA-4	0.0769988	4.60339	4	7W	Female	HE7W_FE1	PGC	mitotic
TGAGCATGTGATGCCC-4	-4.98607	1.66676	4	7W	Female	HE7W_FE1	PGC	SPARC_Pos
TGTCCCAGTGCCTGCA-4	-0.821661	5.94797	4	7W	Female	HE7W_FE1	PGC	mitotic
TTAGTTCCAGGTTTCA-4	-1.30487	5.88961	4	7W	Female	HE7W_FE1	PGC	mitotic
TTCGAAGCACGGTAAG-4	-0.0565792	5.01977	4	7W	Female	HE7W_FE1	PGC	mitotic
TTCGGTCGTACTCAAC-4	-1.38638	5.95274	4	7W	Female	HE7W_FE1	PGC	mitotic
TTCTACAAGCATGGCA-4	1.85802	5.98685	4	7W	Female	HE7W_FE1	PGC	mitotic
TTCTCCTGTCGGATCC-4	1.60534	5.89664	4	7W	Female	HE7W_FE1	PGC	mitotic
TTCTTAGTCGTCTGCT-4	-0.75255	5.7077	4	7W	Female	HE7W_FE1	PGC	mitotic
AAACCTGAGGATGGTC-5	-4.04031	1.69075	5	8W	Male	HE8W_E1	PGC	mitotic
AAACGGGTCTTGTATC-5	-2.47807	3.37497	5	8W	Male	HE8W_E1	PGC	mitotic
AAAGATGCACAGACTT-5	-3.34471	-1.15513	5	8W	Male	HE8W_E1	PGC	Cycling
AAAGCAATCGGTTCGG-5	-2.09391	-4.24569	5	8W	Male	HE8W_E1	PGC	Cycling
AACACGTAGGGTGTGT-5	-3.62717	-0.985353	5	8W	Male	HE8W_E1	PGC	Cycling
AACACGTGTTCAGCGC-5	-1.71507	1.99407	5	8W	Male	HE8W_E1	PGC	mitotic
AACCGCGCAAGAGGCT-5	-1.69751	2.69875	5	8W	Male	HE8W_E1	PGC	mitotic
AACCGCGGTTAGGGTG-5	-3.60322	-1.21089	5	8W	Male	HE8W_E1	PGC	Cycling
AACTCAGAGCGATAGC-5	-1.89486	3.55066	5	8W	Male	HE8W_E1	PGC	mitotic
AACTCTTAGTGGGCTA-5	-3.13028	-0.6842	5	8W	Male	HE8W_E1	PGC	Cycling
AACTCTTCAAGTTAAG-5	1.42451	2.47411	5	8W	Male	HE8W_E1	PGC	mitotic
AACTGGTTCATACGGT-5	-1.63272	2.59785	5	8W	Male	HE8W_E1	PGC	mitotic
AAGACCTCACACCGAC-5	-2.38461	3.18191	5	8W	Male	HE8W_E1	PGC	mitotic
AAGGAGCTCCGTAGTA-5	-1.46696	2.18241	5	8W	Male	HE8W_E1	PGC	mitotic
AAGGAGCTCTGGTATG-5	-2.46851	1.83879	5	8W	Male	HE8W_E1	PGC	mitotic
AAGGCAGCAATGAAAC-5	-2.51767	2.19514	5	8W	Male	HE8W_E1	PGC	mitotic
AAGGTTCGTCTAACGT-5	-3.30005	-1.03366	5	8W	Male	HE8W_E1	PGC	Cycling
AAGTCTGCAGACAAAT-5	-1.51579	1.76667	5	8W	Male	HE8W_E1	PGC	mitotic
ACACCAAGTTATCGGT-5	3.16858	4.79116	5	8W	Male	HE8W_E1	PGC	mitotic
ACACCGGAGGCATTGG-5	-2.52724	2.29535	5	8W	Male	HE8W_E1	PGC	mitotic
ACACTGATCTACTATC-5	-2.59822	0.174887	5	8W	Male	HE8W_E1	PGC	Cycling
ACATCAGAGGGCATGT-5	-3.53612	-0.886187	5	8W	Male	HE8W_E1	PGC	Cycling
ACCAGTAGTGTAACGG-5	-2.08377	3.52223	5	8W	Male	HE8W_E1	PGC	mitotic
ACCCACTTCCGAACGC-5	-3.21186	-1.59051	5	8W	Male	HE8W_E1	PGC	Cycling
ACGAGCCAGGTGCAAC-5	-0.845175	1.68617	5	8W	Male	HE8W_E1	PGC	mitotic
ACGATGTGTCGCGGTT-5	-4.70269	0.762977	5	8W	Male	HE8W_E1	PGC	SPARC_Pos
ACGCAGCAGTGTCCCG-5	-2.12855	2.19379	5	8W	Male	HE8W_E1	PGC	mitotic
ACGCAGCCATTAGGCT-5	-2.6688	2.12165	5	8W	Male	HE8W_E1	PGC	mitotic
ACGCAGCTCGGCGCAT-5	-3.20519	-1.72322	5	8W	Male	HE8W_E1	PGC	Cycling
ACGCCAGGTAAACCTC-5	-3.17015	-1.01993	5	8W	Male	HE8W_E1	PGC	Cycling
ACGGAGATCAGAGACG-5	-2.86522	2.29841	5	8W	Male	HE8W_E1	PGC	mitotic
ACGGCCATCATTCACT-5	-2.01648	2.05342	5	8W	Male	HE8W_E1	PGC	mitotic
ACGGCCATCCCGGATG-5	-2.20312	3.46635	5	8W	Male	HE8W_E1	PGC	mitotic
ACTATCTCACGGACAA-5	-1.39267	1.87481	5	8W	Male	HE8W_E1	PGC	mitotic
ACTGAACCACATCCAA-5	-3.1826	-1.06329	5	8W	Male	HE8W_E1	PGC	Cycling
ACTGAGTCAGGACGTA-5	-3.18513	-0.459766	5	8W	Male	HE8W_E1	PGC	Cycling
ACTGAGTGTCGACTGC-5	-2.3552	3.39417	5	8W	Male	HE8W_E1	PGC	mitotic
ACTGCTCTCAGAGGTG-5	-3.46179	-1.20268	5	8W	Male	HE8W_E1	PGC	Cycling
ACTGCTCTCCAAAGTC-5	-1.91393	1.98842	5	8W	Male	HE8W_E1	PGC	mitotic
ACTGTCCCAAGCCATT-5	-1.6703	2.8804	5	8W	Male	HE8W_E1	PGC	mitotic
ACTTTCACACCACCAG-5	-2.54773	2.53365	5	8W	Male	HE8W_E1	PGC	mitotic
AGACGTTTCTGACCTC-5	-1.49294	2.72576	5	8W	Male	HE8W_E1	PGC	mitotic
AGAGCTTCATGCAACT-5	-1.47925	1.61594	5	8W	Male	HE8W_E1	PGC	mitotic
AGAGCTTTCTCATTCA-5	-3.66296	-0.710909	5	8W	Male	HE8W_E1	PGC	Cycling
AGATCTGGTGCAACGA-5	-2.48171	0.405041	5	8W	Male	HE8W_E1	PGC	mitotic
AGCTCCTAGAACAACT-5	-5.32178	1.87431	5	8W	Male	HE8W_E1	PGC	SPARC_Pos
AGCTCTCAGGAATGGA-5	-3.04719	-0.461849	5	8W	Male	HE8W_E1	PGC	Cycling
AGGCCACAGAGGTTAT-5	-2.025	2.24506	5	8W	Male	HE8W_E1	PGC	mitotic
AGGGAGTAGTGTTAGA-5	-2.48222	2.63576	5	8W	Male	HE8W_E1	PGC	mitotic
AGGGAGTCACGGTAGA-5	-3.03696	2.82614	5	8W	Male	HE8W_E1	PGC	mitotic
AGGTCCGCATGACGGA-5	-2.21358	1.51553	5	8W	Male	HE8W_E1	PGC	mitotic
AGTGGGAAGAGTACAT-5	-1.98974	1.81623	5	8W	Male	HE8W_E1	PGC	mitotic
AGTGGGAAGATCTGCT-5	-3.34847	-1.46918	5	8W	Male	HE8W_E1	PGC	Cycling
AGTGTCAAGCCGTCGT-5	-1.89761	2.81828	5	8W	Male	HE8W_E1	PGC	mitotic
ATCACGAGTGGGTATG-5	-3.5635	-0.720426	5	8W	Male	HE8W_E1	PGC	Cycling
ATCATCTAGAGCTATA-5	-3.05373	2.87334	5	8W	Male	HE8W_E1	PGC	mitotic
ATCATGGAGCGTCAAG-5	-3.2403	-0.788761	5	8W	Male	HE8W_E1	PGC	Cycling
ATCGAGTTCCCTAATT-5	-5.60251	1.41579	5	8W	Male	HE8W_E1	PGC	SPARC_Pos
ATCTACTAGTAGTGCG-5	-3.3388	-0.812524	5	8W	Male	HE8W_E1	PGC	Cycling
ATCTGCCAGGTCATCT-5	-5.5949	1.67383	5	8W	Male	HE8W_E1	PGC	SPARC_Pos
ATGAGGGTCTGAGTGT-5	-2.22298	1.11635	5	8W	Male	HE8W_E1	PGC	mitotic
ATGGGAGCATCGGGTC-5	-2.76927	0.94397	5	8W	Male	HE8W_E1	PGC	mitotic
ATGGGAGTCTGCGTAA-5	-3.09435	-0.439414	5	8W	Male	HE8W_E1	PGC	Cycling
ATGTGTGCATAGTAAG-5	-1.64326	2.70435	5	8W	Male	HE8W_E1	PGC	mitotic
ATGTGTGTCACCTTAT-5	-2.24381	3.50004	5	8W	Male	HE8W_E1	PGC	mitotic
ATTACTCAGGGCTTGA-5	-1.71737	2.74819	5	8W	Male	HE8W_E1	PGC	mitotic
ATTACTCCAGCGTCCA-5	-2.63213	0.304442	5	8W	Male	HE8W_E1	PGC	mitotic
ATTACTCGTATTACCG-5	-3.48385	2.52997	5	8W	Male	HE8W_E1	PGC	mitotic
ATTATCCCAAGCCATT-5	-1.28823	1.20081	5	8W	Male	HE8W_E1	PGC	mitotic
ATTATCCTCCTACAGA-5	-3.22061	-1.50501	5	8W	Male	HE8W_E1	PGC	Cycling
ATTCTACTCCAGTAGT-5	-2.52894	1.91739	5	8W	Male	HE8W_E1	PGC	mitotic
ATTTCTGAGTATTGGA-5	-1.95542	1.37845	5	8W	Male	HE8W_E1	PGC	mitotic
ATTTCTGGTGCATCTA-5	1.97877	2.27314	5	8W	Male	HE8W_E1	PGC	mitotic
CAACTAGGTCAGTGGA-5	-2.19109	2.09005	5	8W	Male	HE8W_E1	PGC	mitotic
CAAGAAATCAGCTGGC-5	-2.21098	2.48894	5	8W	Male	HE8W_E1	PGC	mitotic
CAAGTTGAGCTAGTTC-5	-2.33099	2.05951	5	8W	Male	HE8W_E1	PGC	mitotic
CACAAACGTCCAGTAT-5	-2.0584	2.06909	5	8W	Male	HE8W_E1	PGC	mitotic
CACAGGCAGTCCAGGA-5	-3.20937	-1.82214	5	8W	Male	HE8W_E1	PGC	Cycling
CACAGGCAGTTAGCGG-5	-2.21044	2.25763	5	8W	Male	HE8W_E1	PGC	mitotic
CACAGGCTCAACACGT-5	-1.58826	1.63249	5	8W	Male	HE8W_E1	PGC	mitotic
CACAGTACAGTGGAGT-5	-1.57652	3.04126	5	8W	Male	HE8W_E1	PGC	mitotic
CACATAGCAAATTGCC-5	-2.15791	2.98021	5	8W	Male	HE8W_E1	PGC	mitotic
CACATAGTCATTATCC-5	-2.43547	2.06114	5	8W	Male	HE8W_E1	PGC	mitotic
CACATTTGTCGACTAT-5	-3.28229	-0.98295	5	8W	Male	HE8W_E1	PGC	Cycling
CACCACTCACCTATCC-5	-3.72929	-0.896885	5	8W	Male	HE8W_E1	PGC	Cycling
CACTCCACAGACGCTC-5	-2.31554	0.747699	5	8W	Male	HE8W_E1	PGC	mitotic
CAGCATACAAGAGGCT-5	-3.6727	-1.45168	5	8W	Male	HE8W_E1	PGC	Cycling
CAGCCGACAAGTTAAG-5	-3.18009	-0.917	5	8W	Male	HE8W_E1	PGC	Cycling
CAGCCGACACGGCGTT-5	-2.00301	2.46622	5	8W	Male	HE8W_E1	PGC	mitotic
CAGTCCTGTTCGAATC-5	-2.1067	0.822648	5	8W	Male	HE8W_E1	PGC	mitotic
CATCAGATCCTATTCA-5	-2.41539	1.7233	5	8W	Male	HE8W_E1	PGC	mitotic
CATCCACTCGCCAGCA-5	-3.26902	-1.24145	5	8W	Male	HE8W_E1	PGC	Cycling
CATGACATCGCCGTGA-5	-3.02804	-3.16849	5	8W	Male	HE8W_E1	PGC	Cycling
CATGGCGAGATGTGTA-5	-2.68762	-0.115668	5	8W	Male	HE8W_E1	PGC	Cycling
CATGGCGGTGGTCCGT-5	-2.90142	-0.194851	5	8W	Male	HE8W_E1	PGC	Cycling
CCAATCCCACGAAACG-5	-3.3168	-1.29916	5	8W	Male	HE8W_E1	PGC	Cycling
CCAATCCGTAGGGTAC-5	-2.53461	2.56299	5	8W	Male	HE8W_E1	PGC	mitotic
CCACGGACAATGTTGC-5	-1.86529	1.64726	5	8W	Male	HE8W_E1	PGC	mitotic
CCATTCGAGCAATCTC-5	-2.78711	3.07504	5	8W	Male	HE8W_E1	PGC	mitotic
CCCAATCAGATGCGAC-5	-3.76719	-0.846433	5	8W	Male	HE8W_E1	PGC	Cycling
CCCAGTTAGCGTGTCC-5	-3.64546	-1.09667	5	8W	Male	HE8W_E1	PGC	Cycling
CCCAGTTTCATGTCTT-5	-3.64114	-1.19745	5	8W	Male	HE8W_E1	PGC	Cycling
CCCTCCTAGTTGTAGA-5	-3.13701	-0.416669	5	8W	Male	HE8W_E1	PGC	Cycling
CCCTCCTGTACCCAAT-5	1.91008	1.93237	5	8W	Male	HE8W_E1	PGC	mitotic
CCGTGGATCTTGTACT-5	-2.91611	-0.368788	5	8W	Male	HE8W_E1	PGC	Cycling
CCTACACTCTCGTATT-5	-2.99258	-0.0532344	5	8W	Male	HE8W_E1	PGC	mitotic
CCTCAGTAGTAGGTGC-5	3.50045	2.27876	5	8W	Male	HE8W_E1	PGC	mitotic
CCTTCCCCAACTTGAC-5	-2.85457	-0.287277	5	8W	Male	HE8W_E1	PGC	Cycling
CCTTCGAAGGAGTAGA-5	-1.70509	1.74847	5	8W	Male	HE8W_E1	PGC	mitotic
CCTTTCTCACAGACAG-5	-3.54354	-0.77908	5	8W	Male	HE8W_E1	PGC	Cycling
CCTTTCTTCCATGCTC-5	-2.28858	0.514623	5	8W	Male	HE8W_E1	PGC	mitotic
CGAATGTTCCCGGATG-5	-1.89617	3.57149	5	8W	Male	HE8W_E1	PGC	mitotic
CGAGCACCAATGGAAT-5	-2.91287	0.0533664	5	8W	Male	HE8W_E1	PGC	mitotic
CGATCGGAGCGACGTA-5	-5.32203	1.24886	5	8W	Male	HE8W_E1	PGC	SPARC_Pos
CGATCGGGTCTACCTC-5	-2.82073	3.06086	5	8W	Male	HE8W_E1	PGC	mitotic
CGATGGCGTGGAAAGA-5	-1.41643	1.66213	5	8W	Male	HE8W_E1	PGC	mitotic
CGATGTACAGCTCGCA-5	-2.65663	0.217209	5	8W	Male	HE8W_E1	PGC	mitotic
CGATTGAAGGGCTTGA-5	-1.71846	1.82724	5	8W	Male	HE8W_E1	PGC	mitotic
CGCCAAGGTGGTCTCG-5	-1.68666	1.40555	5	8W	Male	HE8W_E1	PGC	mitotic
CGCGGTAAGAGAACAG-5	-3.48107	-0.878532	5	8W	Male	HE8W_E1	PGC	Cycling
CGCTGGAAGGGTTTCT-5	-2.31199	1.77771	5	8W	Male	HE8W_E1	PGC	mitotic
CGGACGTTCAGTCAGT-5	-2.52345	2.99264	5	8W	Male	HE8W_E1	PGC	mitotic
CGGACGTTCTGGTTCC-5	-2.54794	1.70429	5	8W	Male	HE8W_E1	PGC	mitotic
CGGACTGGTCCATCCT-5	-2.12433	3.50266	5	8W	Male	HE8W_E1	PGC	mitotic
CGGAGCTAGCGTAATA-5	-1.90191	0.110942	5	8W	Male	HE8W_E1	PGC	Cycling
CGGCTAGAGAGCCCAA-5	-1.59739	2.93925	5	8W	Male	HE8W_E1	PGC	mitotic
CGGCTAGCACTAGTAC-5	-1.72924	2.0343	5	8W	Male	HE8W_E1	PGC	mitotic
CGGGTCAGTTCTGGTA-5	-2.08943	1.74592	5	8W	Male	HE8W_E1	PGC	mitotic
CGTAGCGCACGGTGTC-5	4.36308	2.61828	5	8W	Male	HE8W_E1	PGC	mitotic
CGTAGCGGTTAAGTAG-5	0.252949	2.355	5	8W	Male	HE8W_E1	PGC	mitotic
CGTAGGCGTTGGTGGA-5	-2.22659	3.47382	5	8W	Male	HE8W_E1	PGC	mitotic
CGTAGGCTCTTGTTTG-5	-2.82262	-1.92356	5	8W	Male	HE8W_E1	PGC	Cycling
CGTCACTAGTACACCT-5	-3.92007	1.71335	5	8W	Male	HE8W_E1	PGC	mitotic
CGTCAGGCAGGAATCG-5	-3.19276	-0.571303	5	8W	Male	HE8W_E1	PGC	Cycling
CGTCCATAGGCTAGCA-5	-3.44276	-1.4196	5	8W	Male	HE8W_E1	PGC	Cycling
CGTCCATAGGGCATGT-5	-2.20141	3.41631	5	8W	Male	HE8W_E1	PGC	mitotic
CGTCCATCACGGTTTA-5	-2.20962	-1.14171	5	8W	Male	HE8W_E1	PGC	Cycling
CGTTAGAAGGTGTTAA-5	2.83237	1.04997	5	8W	Male	HE8W_E1	PGC	mitotic
CGTTAGAGTTACGACT-5	-2.20061	3.44795	5	8W	Male	HE8W_E1	PGC	mitotic
CGTTCTGGTTACGGAG-5	-2.01811	2.90326	5	8W	Male	HE8W_E1	PGC	mitotic
CTAACTTCAAGGTTCT-5	-2.89983	-3.3878	5	8W	Male	HE8W_E1	PGC	Cycling
CTACGTCAGGGTGTGT-5	-2.18213	3.08777	5	8W	Male	HE8W_E1	PGC	mitotic
CTACGTCCAGCTTAAC-5	-3.175	-2.7687	5	8W	Male	HE8W_E1	PGC	Cycling
CTCAGAAGTAACGTTC-5	2.37806	4.59022	5	8W	Male	HE8W_E1	PGC	mitotic
CTCATTAAGTCCATAC-5	-3.29063	-1.00729	5	8W	Male	HE8W_E1	PGC	Cycling
CTCGGAGGTACATCCA-5	-3.58559	-0.948528	5	8W	Male	HE8W_E1	PGC	Cycling
CTCGGGAGTTCAGTAC-5	-2.66337	2.24167	5	8W	Male	HE8W_E1	PGC	mitotic
CTCGTCAAGCTGGAAC-5	-2.33908	1.39281	5	8W	Male	HE8W_E1	PGC	mitotic
CTCTAATGTGGCGAAT-5	-2.21281	0.044117	5	8W	Male	HE8W_E1	PGC	Cycling
CTCTAATGTTCATGGT-5	-2.43626	1.62915	5	8W	Male	HE8W_E1	PGC	mitotic
CTCTAATTCTTTACGT-5	-3.23	-0.596141	5	8W	Male	HE8W_E1	PGC	Cycling
CTCTACGAGTGAACAT-5	-2.2451	3.0108	5	8W	Male	HE8W_E1	PGC	mitotic
CTCTGGTCAAGCCGCT-5	-5.74655	1.57153	5	8W	Male	HE8W_E1	PGC	SPARC_Pos
CTCTGGTGTAGCGATG-5	0.125352	1.77493	5	8W	Male	HE8W_E1	PGC	mitotic
CTGAAACCAAGTTGTC-5	-3.33163	-1.03183	5	8W	Male	HE8W_E1	PGC	Cycling
CTGATAGAGCGCTCCA-5	-2.6816	3.02247	5	8W	Male	HE8W_E1	PGC	mitotic
CTGATAGAGTGGAGTC-5	-3.32091	-1.21837	5	8W	Male	HE8W_E1	PGC	mitotic
CTTAACTGTATATGAG-5	-2.66503	3.04171	5	8W	Male	HE8W_E1	PGC	mitotic
CTTACCGCAAGCGAGT-5	-1.94033	2.61646	5	8W	Male	HE8W_E1	PGC	mitotic
CTTAGGAGTAATTGGA-5	-1.88977	2.77518	5	8W	Male	HE8W_E1	PGC	mitotic
CTTGGCTCACGGCCAT-5	-3.29871	-0.781914	5	8W	Male	HE8W_E1	PGC	Cycling
CTTTGCGAGAGCTTCT-5	-2.15117	3.55587	5	8W	Male	HE8W_E1	PGC	mitotic
CTTTGCGTCCAAAGTC-5	-1.66668	2.77143	5	8W	Male	HE8W_E1	PGC	mitotic
GAAACTCTCCAGAGGA-5	-2.62738	3.3234	5	8W	Male	HE8W_E1	PGC	mitotic
GAAATGATCTAACCGA-5	-3.26709	-1.71334	5	8W	Male	HE8W_E1	PGC	Cycling
GAACCTAGTAAAGTCA-5	1.65114	1.66124	5	8W	Male	HE8W_E1	PGC	mitotic
GAAGCAGAGATCTGAA-5	-2.08566	2.31667	5	8W	Male	HE8W_E1	PGC	mitotic
GACACGCCACCCATGG-5	-2.66902	3.14343	5	8W	Male	HE8W_E1	PGC	mitotic
GACGGCTCACAACGTT-5	-2.08967	2.31216	5	8W	Male	HE8W_E1	PGC	mitotic
GACGTGCGTGGTACAG-5	-1.60958	2.66951	5	8W	Male	HE8W_E1	PGC	mitotic
GACGTGCGTTAGTGGG-5	-2.6167	2.87591	5	8W	Male	HE8W_E1	PGC	mitotic
GACGTTACATTACCTT-5	-2.65977	0.167676	5	8W	Male	HE8W_E1	PGC	Cycling
GACTGCGTCCAGTATG-5	-3.73316	-0.85778	5	8W	Male	HE8W_E1	PGC	Cycling
GAGCAGAAGAGACTAT-5	-2.43927	0.321274	5	8W	Male	HE8W_E1	PGC	Cycling
GAGCAGATCTACGAGT-5	-3.33014	-0.82343	5	8W	Male	HE8W_E1	PGC	Cycling
GATCAGTGTCGAGATG-5	-1.58404	2.54751	5	8W	Male	HE8W_E1	PGC	mitotic
GATCGATCAGCATGAG-5	-2.12382	1.02742	5	8W	Male	HE8W_E1	PGC	mitotic
GATCGATCAGCCACCA-5	-1.74104	2.33022	5	8W	Male	HE8W_E1	PGC	mitotic
GATCGCGTCATCGCTC-5	-2.12204	1.01513	5	8W	Male	HE8W_E1	PGC	mitotic
GATCGTAGTCTGGTCG-5	-3.67182	-0.89214	5	8W	Male	HE8W_E1	PGC	Cycling
GATCTAGTCAAAGACA-5	-3.25772	-0.652471	5	8W	Male	HE8W_E1	PGC	Cycling
GATTCAGAGATGTAAC-5	-2.78942	2.21642	5	8W	Male	HE8W_E1	PGC	mitotic
GCAAACTTCTCTGAGA-5	-4.1077	2.5538	5	8W	Male	HE8W_E1	PGC	mitotic
GCACATACAAGACACG-5	-3.09942	-0.61442	5	8W	Male	HE8W_E1	PGC	Cycling
GCACTCTAGCCAGGAT-5	-2.48213	1.32977	5	8W	Male	HE8W_E1	PGC	mitotic
GCACTCTTCGTGGACC-5	-4.83783	0.720181	5	8W	Male	HE8W_E1	PGC	SPARC_Pos
GCATACACAAGCCGCT-5	-2.05825	3.45525	5	8W	Male	HE8W_E1	PGC	mitotic
GCATGATCAGTCCTTC-5	-4.14059	1.98586	5	8W	Male	HE8W_E1	PGC	mitotic
GCCAAATAGTATGACA-5	-2.14592	2.82832	5	8W	Male	HE8W_E1	PGC	mitotic
GCGCAACGTACCCAAT-5	-2.66035	-0.0867319	5	8W	Male	HE8W_E1	PGC	Cycling
GCGCCAACAAACGTGG-5	-3.27634	-0.846721	5	8W	Male	HE8W_E1	PGC	Cycling
GCGCCAAGTATGAATG-5	-3.36102	-0.598547	5	8W	Male	HE8W_E1	PGC	Cycling
GCGCGATCACCGTTGG-5	-2.28676	1.3229	5	8W	Male	HE8W_E1	PGC	mitotic
GCGCGATGTCGCTTCT-5	-1.79173	2.81593	5	8W	Male	HE8W_E1	PGC	mitotic
GCTCCTAGTCATCCCT-5	0.443641	-1.3594	5	8W	Male	HE8W_E1	PGC	mitotic
GCTCTGTCAACTGCGC-5	-3.80259	-0.821354	5	8W	Male	HE8W_E1	PGC	Cycling
GCTGCAGAGTGCAAGC-5	-2.64717	3.24239	5	8W	Male	HE8W_E1	PGC	mitotic
GCTGCTTAGGACAGCT-5	-2.07726	3.56073	5	8W	Male	HE8W_E1	PGC	mitotic
GCTGGGTTCGCATGAT-5	-1.39727	1.07124	5	8W	Male	HE8W_E1	PGC	mitotic
GGAAAGCAGCGAAGGG-5	-1.71624	2.76812	5	8W	Male	HE8W_E1	PGC	mitotic
GGAACTTCACGGCCAT-5	-2.2445	2.33394	5	8W	Male	HE8W_E1	PGC	mitotic
GGAACTTTCTCACATT-5	-2.08099	0.746053	5	8W	Male	HE8W_E1	PGC	mitotic
GGAGCAAAGTGTCTCA-5	-2.49347	0.290946	5	8W	Male	HE8W_E1	PGC	mitotic
GGATGTTTCAACCAAC-5	-2.7804	2.4696	5	8W	Male	HE8W_E1	PGC	mitotic
GGATGTTTCAGGTTCA-5	-3.40646	-0.904449	5	8W	Male	HE8W_E1	PGC	Cycling
GGCAATTCAAGTTGTC-5	-2.22289	1.06942	5	8W	Male	HE8W_E1	PGC	mitotic
GGCCGATCAGATCCAT-5	-3.70996	-1.03023	5	8W	Male	HE8W_E1	PGC	Cycling
GGCGACTCATCCAACA-5	-2.38502	-1.29887	5	8W	Male	HE8W_E1	PGC	Cycling
GGGAATGTCTCCGGTT-5	-2.6944	2.68209	5	8W	Male	HE8W_E1	PGC	mitotic
GGGAGATCAGGCTGAA-5	-2.31745	0.581788	5	8W	Male	HE8W_E1	PGC	mitotic
GGGATGACAGTAACGG-5	-3.74949	-1.34456	5	8W	Male	HE8W_E1	PGC	Cycling
GGGCACTAGGCATGTG-5	-3.20696	-0.822279	5	8W	Male	HE8W_E1	PGC	Cycling
GGGTCTGCACCTCGGA-5	-2.66145	3.26202	5	8W	Male	HE8W_E1	PGC	mitotic
GGGTTGCCACGGATAG-5	-1.73013	1.9086	5	8W	Male	HE8W_E1	PGC	mitotic
GGGTTGCTCTTTCCTC-5	-2.12593	0.967354	5	8W	Male	HE8W_E1	PGC	mitotic
GGTATTGGTAGTAGTA-5	-2.10413	2.18932	5	8W	Male	HE8W_E1	PGC	mitotic
GTAACTGTCGCACTCT-5	-2.52074	2.88	5	8W	Male	HE8W_E1	PGC	mitotic
GTACTCCGTAGCGATG-5	-1.80772	2.4226	5	8W	Male	HE8W_E1	PGC	mitotic
GTACTTTTCATGTCTT-5	-1.61953	1.60845	5	8W	Male	HE8W_E1	PGC	mitotic
GTAGGCCCATACCATG-5	-2.59536	0.206517	5	8W	Male	HE8W_E1	PGC	Cycling
GTAGTCATCGCATGGC-5	-2.50233	3.34455	5	8W	Male	HE8W_E1	PGC	mitotic
GTATTCTAGAAGGACA-5	-3.65686	-1.22401	5	8W	Male	HE8W_E1	PGC	Cycling
GTCAAGTAGAACAATC-5	-1.64172	2.63959	5	8W	Male	HE8W_E1	PGC	mitotic
GTCAAGTCAGCCTGTG-5	-2.0646	-2.43766	5	8W	Male	HE8W_E1	PGC	Cycling
GTCAAGTTCTCTAGGA-5	-2.00884	2.95637	5	8W	Male	HE8W_E1	PGC	mitotic
GTCGTAAGTGTGACGA-5	-1.58708	1.84228	5	8W	Male	HE8W_E1	PGC	mitotic
GTGCAGCCAGATCTGT-5	-3.70433	-1.18681	5	8W	Male	HE8W_E1	PGC	Cycling
GTGTTAGAGTACGACG-5	-2.51632	0.168246	5	8W	Male	HE8W_E1	PGC	Cycling
GTTCGGGTCCTATTCA-5	-2.70983	3.32697	5	8W	Male	HE8W_E1	PGC	mitotic
GTTTCTAAGTTGCAGG-5	-3.41829	2.72446	5	8W	Male	HE8W_E1	PGC	mitotic
GTTTCTAGTGGCCCTA-5	-2.4122	2.04774	5	8W	Male	HE8W_E1	PGC	mitotic
GTTTCTAGTTATCGGT-5	-2.58686	3.12488	5	8W	Male	HE8W_E1	PGC	mitotic
GTTTCTATCTGTCCGT-5	-2.39999	1.2501	5	8W	Male	HE8W_E1	PGC	mitotic
TAAGCGTAGAGACTTA-5	-2.21761	2.27508	5	8W	Male	HE8W_E1	PGC	mitotic
TAAGTGCAGGCTACGA-5	0.876644	2.04272	5	8W	Male	HE8W_E1	PGC	mitotic
TAAGTGCTCTGGCGTG-5	0.072268	3.90862	5	8W	Male	HE8W_E1	PGC	mitotic
TACCTTACACTATCTT-5	-3.82364	-0.795557	5	8W	Male	HE8W_E1	PGC	Cycling
TACCTTATCTCGATGA-5	-2.70824	-0.326128	5	8W	Male	HE8W_E1	PGC	mitotic
TACGGGCTCAGCTGGC-5	-2.37842	2.38966	5	8W	Male	HE8W_E1	PGC	mitotic
TAGTGGTAGAGTGACC-5	-3.74042	-1.08664	5	8W	Male	HE8W_E1	PGC	Cycling
TAGTGGTTCGAGCCCA-5	-1.89539	2.83387	5	8W	Male	HE8W_E1	PGC	mitotic
TAGTTGGCAAATTGCC-5	-2.63185	3.26822	5	8W	Male	HE8W_E1	PGC	mitotic
TATGCCCAGATACACA-5	-3.8215	-0.87453	5	8W	Male	HE8W_E1	PGC	Cycling
TATGCCCCATAAGACA-5	-2.1603	3.52257	5	8W	Male	HE8W_E1	PGC	mitotic
TCAACGAGTTATGTGC-5	-2.16783	3.40527	5	8W	Male	HE8W_E1	PGC	mitotic
TCAATCTCAAAGGAAG-5	-1.74239	2.48458	5	8W	Male	HE8W_E1	PGC	mitotic
TCACAAGGTCACAAGG-5	-2.73927	-0.0716865	5	8W	Male	HE8W_E1	PGC	mitotic
TCAGCTCCATGGTTGT-5	-2.04432	2.16835	5	8W	Male	HE8W_E1	PGC	mitotic
TCAGGATTCCGTCAAA-5	-3.41393	-0.659405	5	8W	Male	HE8W_E1	PGC	Cycling
TCATTACGTAGTACCT-5	-4.63898	0.661524	5	8W	Male	HE8W_E1	PGC	SPARC_Pos
TCCACACTCTGGCGTG-5	-2.19888	0.886577	5	8W	Male	HE8W_E1	PGC	mitotic
TCCCGATAGCAGGCTA-5	-2.29207	2.68615	5	8W	Male	HE8W_E1	PGC	mitotic
TCCCGATGTTAAGATG-5	-1.59646	1.73825	5	8W	Male	HE8W_E1	PGC	mitotic
TCCCGATTCCTTGACC-5	-2.29267	0.663324	5	8W	Male	HE8W_E1	PGC	mitotic
TCGCGAGTCGTTTAGG-5	-1.15445	2.03181	5	8W	Male	HE8W_E1	PGC	mitotic
TCGGTAACACATTCGA-5	-2.40262	2.50952	5	8W	Male	HE8W_E1	PGC	mitotic
TCGGTAACACCCTATC-5	-2.77273	2.17619	5	8W	Male	HE8W_E1	PGC	mitotic
TCGGTAATCGTCACGG-5	-2.62202	2.43429	5	8W	Male	HE8W_E1	PGC	mitotic
TCTATTGTCCTGTAGA-5	-2.46232	2.49221	5	8W	Male	HE8W_E1	PGC	mitotic
TCTCTAAGTATGGTTC-5	-3.3146	-0.877808	5	8W	Male	HE8W_E1	PGC	Cycling
TCTGAGAAGAGTAATC-5	-2.47989	2.90108	5	8W	Male	HE8W_E1	PGC	mitotic
TGAAAGAGTCAGATAA-5	-2.6653	2.9137	5	8W	Male	HE8W_E1	PGC	mitotic
TGACTTTTCCGCATCT-5	-5.7525	1.22752	5	8W	Male	HE8W_E1	PGC	SPARC_Pos
TGAGAGGAGTCTCAAC-5	-2.67096	1.75706	5	8W	Male	HE8W_E1	PGC	mitotic
TGATTTCCAGCGAACA-5	4.70254	3.28735	5	8W	Male	HE8W_E1	PGC	mitotic
TGCCAAAAGTGGGCTA-5	-3.40434	-1.2437	5	8W	Male	HE8W_E1	PGC	Cycling
TGCCCATGTACGACCC-5	-2.26477	3.37129	5	8W	Male	HE8W_E1	PGC	mitotic
TGCCCATGTTATGCGT-5	-3.11902	-0.833641	5	8W	Male	HE8W_E1	PGC	Cycling
TGCCCTACAGGATTGG-5	-2.72642	0.0805465	5	8W	Male	HE8W_E1	PGC	Cycling
TGCGCAGCATGTCTCC-5	-2.03973	3.55766	5	8W	Male	HE8W_E1	PGC	mitotic
TGGCGCAGTCGAGATG-5	-2.96625	-0.568193	5	8W	Male	HE8W_E1	PGC	Cycling
TGGGAAGAGAAACCTA-5	1.95547	1.62078	5	8W	Male	HE8W_E1	PGC	mitotic
TGGGAAGAGGGATCTG-5	-1.74549	2.24153	5	8W	Male	HE8W_E1	PGC	mitotic
TGGTTAGTCTCGCATC-5	-3.65365	-1.34835	5	8W	Male	HE8W_E1	PGC	Cycling
TGTATTCGTACTTGAC-5	-2.34103	1.34535	5	8W	Male	HE8W_E1	PGC	mitotic
TGTCCCACACATGACT-5	-2.08791	2.1401	5	8W	Male	HE8W_E1	PGC	mitotic
TGTCCCACAGCCTTGG-5	1.80735	2.2058	5	8W	Male	HE8W_E1	PGC	mitotic
TTAACTCGTCTCTCGT-5	-2.57445	0.194793	5	8W	Male	HE8W_E1	PGC	Cycling
TTAGGACGTCACCCAG-5	-1.94508	1.95836	5	8W	Male	HE8W_E1	PGC	mitotic
TTATGCTTCTCGCTTG-5	-3.64337	-0.809475	5	8W	Male	HE8W_E1	PGC	Cycling
TTCCCAGGTCTCTTTA-5	-1.95732	2.38787	5	8W	Male	HE8W_E1	PGC	mitotic
TTCTACACAGTATCTG-5	-2.20849	3.1177	5	8W	Male	HE8W_E1	PGC	mitotic
TTCTCCTAGGAGCGTT-5	-2.61257	0.0430745	5	8W	Male	HE8W_E1	PGC	mitotic
TTCTCCTGTAGATTAG-5	-2.82579	0.0994112	5	8W	Male	HE8W_E1	PGC	mitotic
TTCTTAGCATGTCCTC-5	-3.48369	-0.851161	5	8W	Male	HE8W_E1	PGC	Cycling
TTGAACGAGACAATAC-5	-2.67475	2.28434	5	8W	Male	HE8W_E1	PGC	mitotic
TTGAACGAGCCAGGAT-5	-2.6662	2.44334	5	8W	Male	HE8W_E1	PGC	mitotic
TTGACTTCACTGCCAG-5	3.1014	-2.28083	5	8W	Male	HE8W_E1	PGC	mitotic
TTGACTTTCTTAGCCC-5	-2.17238	2.58895	5	8W	Male	HE8W_E1	PGC	mitotic
TTGCGTCGTCTCGTTC-5	2.16722	1.10796	5	8W	Male	HE8W_E1	PGC	mitotic
TTGGAACCATCCTTGC-5	-1.33074	1.77324	5	8W	Male	HE8W_E1	PGC	mitotic
TTGGAACGTCGAACAG-5	-1.66933	1.35271	5	8W	Male	HE8W_E1	PGC	mitotic
TTTACTGGTCAAGCGA-5	-3.3669	-1.10802	5	8W	Male	HE8W_E1	PGC	mitotic
TTTATGCGTCGCATCG-5	-2.40128	3.14235	5	8W	Male	HE8W_E1	PGC	mitotic
AAACCTGGTTAAAGAC-6	-2.85358	-2.54904	6	9W	Male	HE9W_E1	PGC	Cycling
AAACGGGTCATAACCG-6	-2.13823	-1.18254	6	9W	Male	HE9W_E1	PGC	Cycling
AAAGTAGGTGAAATCA-6	-3.1417	-2.89324	6	9W	Male	HE9W_E1	PGC	Cycling
AACACGTCACAACTGT-6	-1.46571	-1.6114	6	9W	Male	HE9W_E1	PGC	Cycling
AACACGTCAGCTCCGA-6	-5.57117	1.46697	6	9W	Male	HE9W_E1	PGC	SPARC_Pos
AACCATGCAAAGTGCG-6	2.55167	2.35393	6	9W	Male	HE9W_E1	PGC	mitotic
AACCGCGGTACAAGTA-6	0.371389	-1.95601	6	9W	Male	HE9W_E1	PGC	Cycling
AACGTTGGTCCGACGT-6	-2.82381	-2.14426	6	9W	Male	HE9W_E1	PGC	Cycling
AACTCAGAGACACGAC-6	3.18177	1.58842	6	9W	Male	HE9W_E1	PGC	mitotic
AACTCAGCACAACGTT-6	1.88132	0.0682411	6	9W	Male	HE9W_E1	PGC	mitotic
AACTCAGCATAAAGGT-6	2.3241	0.611031	6	9W	Male	HE9W_E1	PGC	mitotic
AACTCAGGTGCAACTT-6	-1.83686	-2.94851	6	9W	Male	HE9W_E1	PGC	Cycling
AACTCTTGTTTAGCTG-6	-1.53145	-0.85571	6	9W	Male	HE9W_E1	PGC	Cycling
AACTGGTAGCGTCTAT-6	3.30885	2.1281	6	9W	Male	HE9W_E1	PGC	mitotic
AACTGGTGTCGCGGTT-6	3.36303	3.25398	6	9W	Male	HE9W_E1	PGC	mitotic
AACTTTCCATGTTGAC-6	1.13619	1.23642	6	9W	Male	HE9W_E1	PGC	mitotic
AACTTTCGTTCGCTAA-6	-1.31907	-0.723696	6	9W	Male	HE9W_E1	PGC	Cycling
AACTTTCTCATCGATG-6	-0.486441	-1.6325	6	9W	Male	HE9W_E1	PGC	Cycling
AACTTTCTCGTGTAGT-6	1.83507	0.68227	6	9W	Male	HE9W_E1	PGC	mitotic
AAGACCTAGGCCCGTT-6	-0.105528	-2.89407	6	9W	Male	HE9W_E1	PGC	Cycling
AAGCCGCAGAGCCCAA-6	0.852663	3.2927	6	9W	Male	HE9W_E1	PGC	mitotic
AAGGAGCAGGTAGCTG-6	0.856061	2.91259	6	9W	Male	HE9W_E1	PGC	mitotic
AAGGAGCTCCTCATTA-6	-2.36261	-3.88115	6	9W	Male	HE9W_E1	PGC	Cycling
AAGGCAGAGTGGGATC-6	0.0800153	-2.50516	6	9W	Male	HE9W_E1	PGC	mitotic
AAGGCAGGTTGGTTTG-6	-2.26863	-1.31147	6	9W	Male	HE9W_E1	PGC	Cycling
AAGGTTCCACGTTGGC-6	-3.16204	-1.75609	6	9W	Male	HE9W_E1	PGC	Cycling
AAGGTTCTCACAGGCC-6	3.15467	0.408234	6	9W	Male	HE9W_E1	PGC	mitotic
AAGTCTGGTCATATGC-6	2.86879	2.4728	6	9W	Male	HE9W_E1	PGC	mitotic
AATCGGTAGCACCGCT-6	1.76239	1.41214	6	9W	Male	HE9W_E1	PGC	mitotic
AATCGGTAGGCCGAAT-6	2.47364	2.04015	6	9W	Male	HE9W_E1	PGC	mitotic
AATCGGTGTAAAGGAG-6	0.0517191	0.372318	6	9W	Male	HE9W_E1	PGC	mitotic
AATCGGTTCTGAGGGA-6	0.532899	1.27498	6	9W	Male	HE9W_E1	PGC	mitotic
ACACCAAAGTGACTCT-6	0.342703	-3.7781	6	9W	Male	HE9W_E1	PGC	Cycling
ACACCAAGTAGCCTCG-6	-4.61503	0.963972	6	9W	Male	HE9W_E1	PGC	SPARC_Pos
ACACCAAGTAGGCTGA-6	6.14759	4.03177	6	9W	Male	HE9W_E1	PGC	mitotic
ACACCCTAGAATAGGG-6	4.59143	1.75267	6	9W	Male	HE9W_E1	PGC	mitotic
ACACCCTAGATCTGCT-6	0.718351	0.44909	6	9W	Male	HE9W_E1	PGC	mitotic
ACACCCTCAACGATCT-6	2.69112	-0.32142	6	9W	Male	HE9W_E1	PGC	mitotic
ACACCCTGTGCAACGA-6	-3.22208	-2.35597	6	9W	Male	HE9W_E1	PGC	Cycling
ACACCCTTCGTGGGAA-6	5.7513	1.88452	6	9W	Male	HE9W_E1	PGC	mitotic
ACACCGGAGTTAGCGG-6	-1.52699	-4.10804	6	9W	Male	HE9W_E1	PGC	Cycling
ACACTGAAGAGCTTCT-6	-2.07112	-1.63973	6	9W	Male	HE9W_E1	PGC	Cycling
ACAGCCGCAGATAATG-6	2.05657	2.13992	6	9W	Male	HE9W_E1	PGC	mitotic
ACAGCTAAGACCTTTG-6	-0.188875	-0.571327	6	9W	Male	HE9W_E1	PGC	Cycling
ACAGCTATCCTTTCTC-6	0.359324	-0.401147	6	9W	Male	HE9W_E1	PGC	mitotic
ACATACGAGAAGCCCA-6	-2.51958	-1.84067	6	9W	Male	HE9W_E1	PGC	Cycling
ACATACGAGGGAACGG-6	4.69134	3.67965	6	9W	Male	HE9W_E1	PGC	mitotic
ACATCAGGTCGTGGCT-6	2.04175	2.66522	6	9W	Male	HE9W_E1	PGC	mitotic
ACATCAGTCAGCACAT-6	1.25224	0.876619	6	9W	Male	HE9W_E1	PGC	mitotic
ACATGGTCATCCGGGT-6	5.11006	0.379046	6	9W	Male	HE9W_E1	PGC	mitotic
ACATGGTGTCTCTCGT-6	-0.579183	-1.73442	6	9W	Male	HE9W_E1	PGC	Cycling
ACCCACTCAAGCGAGT-6	1.27674	-0.169313	6	9W	Male	HE9W_E1	PGC	mitotic
ACCCACTGTTGGTTTG-6	5.23109	2.27286	6	9W	Male	HE9W_E1	PGC	mitotic
ACCCACTTCTTTACAC-6	-0.0352906	0.526188	6	9W	Male	HE9W_E1	PGC	mitotic
ACCGTAAAGAGACTTA-6	-0.00852287	-1.95828	6	9W	Male	HE9W_E1	PGC	Cycling
ACCGTAAAGCGTGTCC-6	2.12672	3.38561	6	9W	Male	HE9W_E1	PGC	mitotic
ACCGTAATCATCATTC-6	-2.44664	-2.51706	6	9W	Male	HE9W_E1	PGC	Cycling
ACGAGCCGTAAGTGTA-6	6.23249	0.411218	6	9W	Male	HE9W_E1	PGC	mitotic
ACGAGGAAGATATGGT-6	2.2565	3.23	6	9W	Male	HE9W_E1	PGC	mitotic
ACGATACCAAGCGTAG-6	4.44343	4.28055	6	9W	Male	HE9W_E1	PGC	mitotic
ACGATACGTCTTCGTC-6	-2.93815	-2.97392	6	9W	Male	HE9W_E1	PGC	Cycling
ACGATGTCATAGACTC-6	4.34273	3.63596	6	9W	Male	HE9W_E1	PGC	mitotic
ACGATGTCATGTCCTC-6	1.39202	2.14208	6	9W	Male	HE9W_E1	PGC	mitotic
ACGATGTGTTCGGGCT-6	-1.15412	-1.8224	6	9W	Male	HE9W_E1	PGC	Cycling
ACGCCAGAGAGTACAT-6	-2.16637	-1.80192	6	9W	Male	HE9W_E1	PGC	Cycling
ACGCCGAAGCTAGTGG-6	2.54399	3.35239	6	9W	Male	HE9W_E1	PGC	mitotic
ACGCCGATCAATCTCT-6	-2.4649	-1.94472	6	9W	Male	HE9W_E1	PGC	Cycling
ACGGAGATCTAACTCT-6	1.64036	0.739697	6	9W	Male	HE9W_E1	PGC	mitotic
ACGGCCATCTTCAACT-6	-1.86289	-2.57058	6	9W	Male	HE9W_E1	PGC	Cycling
ACGGGCTAGACATAAC-6	-1.69859	-2.9816	6	9W	Male	HE9W_E1	PGC	Cycling
ACGGGCTCAACGATGG-6	3.34285	1.9641	6	9W	Male	HE9W_E1	PGC	mitotic
ACGGGCTGTAGCGTCC-6	-2.43424	-1.11517	6	9W	Male	HE9W_E1	PGC	Cycling
ACGGGTCAGCCACCTG-6	6.41662	4.06741	6	9W	Male	HE9W_E1	PGC	mitotic
ACGGGTCCACCAGATT-6	1.77547	2.21039	6	9W	Male	HE9W_E1	PGC	mitotic
ACGTCAAGTTCCGTCT-6	-2.07813	-1.58528	6	9W	Male	HE9W_E1	PGC	Cycling
ACTATCTAGCAGCGTA-6	2.40957	1.94264	6	9W	Male	HE9W_E1	PGC	mitotic
ACTATCTTCAAAGTAG-6	1.76328	1.55379	6	9W	Male	HE9W_E1	PGC	mitotic
ACTGAGTGTTCAGGCC-6	-1.10338	0.649557	6	9W	Male	HE9W_E1	PGC	mitotic
ACTGCTCGTTCACGGC-6	-0.909404	-1.58586	6	9W	Male	HE9W_E1	PGC	Cycling
ACTGTCCAGAAAGTGG-6	2.26082	1.64779	6	9W	Male	HE9W_E1	PGC	mitotic
ACTGTCCGTCATCCCT-6	1.48465	2.21992	6	9W	Male	HE9W_E1	PGC	mitotic
ACTGTCCGTTGCGCAC-6	-5.90478	1.41633	6	9W	Male	HE9W_E1	PGC	SPARC_Pos
ACTTACTCAAGCTGGA-6	8.12068	-0.143379	6	9W	Male	HE9W_E1	PGC	mitotic
ACTTACTGTGGGTCAA-6	1.27108	1.51211	6	9W	Male	HE9W_E1	PGC	mitotic
ACTTACTGTTCTGTTT-6	2.60803	2.10375	6	9W	Male	HE9W_E1	PGC	mitotic
ACTTGTTAGGGAACGG-6	1.87155	0.638248	6	9W	Male	HE9W_E1	PGC	mitotic
ACTTTCACATCGGACC-6	0.184837	-2.45442	6	9W	Male	HE9W_E1	PGC	Cycling
ACTTTCATCACGATGT-6	-0.576737	-2.92826	6	9W	Male	HE9W_E1	PGC	Cycling
AGAATAGAGCACAGGT-6	4.54572	3.145	6	9W	Male	HE9W_E1	PGC	mitotic
AGACGTTCAAGAGTCG-6	0.955964	1.6642	6	9W	Male	HE9W_E1	PGC	mitotic
AGACGTTCATACAGCT-6	1.3789	1.35511	6	9W	Male	HE9W_E1	PGC	mitotic
AGAGCGACACTCTGTC-6	1.93527	2.62062	6	9W	Male	HE9W_E1	PGC	mitotic
AGAGCTTAGTATGACA-6	-1.07556	-1.79878	6	9W	Male	HE9W_E1	PGC	Cycling
AGAGCTTAGTTCGATC-6	0.510517	-0.188702	6	9W	Male	HE9W_E1	PGC	mitotic
AGAGTGGGTTGGTAAA-6	-2.0262	-1.44136	6	9W	Male	HE9W_E1	PGC	Cycling
AGATCTGCAATGCCAT-6	3.1315	5.38792	6	9W	Male	HE9W_E1	PGC	mitotic
AGATCTGCACGGACAA-6	-2.66915	-3.60289	6	9W	Male	HE9W_E1	PGC	Cycling
AGATCTGGTCTGGTCG-6	-1.32094	-3.97561	6	9W	Male	HE9W_E1	PGC	Cycling
AGATTGCAGGCGACAT-6	5.44194	2.87905	6	9W	Male	HE9W_E1	PGC	mitotic
AGCGGTCCAAGCCGCT-6	4.78739	2.9656	6	9W	Male	HE9W_E1	PGC	mitotic
AGCGGTCCAGCCAGAA-6	-0.818747	-3.29439	6	9W	Male	HE9W_E1	PGC	Cycling
AGCGTATCACCCTATC-6	5.13957	3.25851	6	9W	Male	HE9W_E1	PGC	mitotic
AGCGTCGGTCGTTGTA-6	2.90306	1.81	6	9W	Male	HE9W_E1	PGC	mitotic
AGCTCCTCACGTCAGC-6	-2.51159	-2.54437	6	9W	Male	HE9W_E1	PGC	Cycling
AGCTCCTGTAAGTGGC-6	4.98708	0.515326	6	9W	Male	HE9W_E1	PGC	mitotic
AGCTCCTTCGACAGCC-6	1.87782	1.68518	6	9W	Male	HE9W_E1	PGC	mitotic
AGCTCTCCATTCCTGC-6	3.23273	2.74282	6	9W	Male	HE9W_E1	PGC	mitotic
AGCTCTCTCAGCAACT-6	5.46656	3.28883	6	9W	Male	HE9W_E1	PGC	mitotic
AGCTTGAAGCCCAGCT-6	4.33962	2.03276	6	9W	Male	HE9W_E1	PGC	mitotic
AGCTTGAAGCGTTTAC-6	0.348647	-0.416234	6	9W	Male	HE9W_E1	PGC	mitotic
AGCTTGAAGTGCGATG-6	-1.5072	-1.54416	6	9W	Male	HE9W_E1	PGC	Cycling
AGCTTGAGTTTGTGTG-6	2.84595	1.69674	6	9W	Male	HE9W_E1	PGC	mitotic
AGGCCACAGTGTTGAA-6	-2.22834	-1.12314	6	9W	Male	HE9W_E1	PGC	Cycling
AGGCCACCATTTCAGG-6	-2.17132	-3.8946	6	9W	Male	HE9W_E1	PGC	Cycling
AGGCCACGTTCATGGT-6	4.51372	1.8261	6	9W	Male	HE9W_E1	PGC	mitotic
AGGCCGTAGTGCTGCC-6	5.45385	1.73494	6	9W	Male	HE9W_E1	PGC	mitotic
AGGGAGTAGCTGATAA-6	-5.07029	1.04752	6	9W	Male	HE9W_E1	PGC	SPARC_Pos
AGGGAGTAGGTTACCT-6	1.43846	1.66623	6	9W	Male	HE9W_E1	PGC	mitotic
AGGGAGTAGTAGGTGC-6	5.00337	2.43919	6	9W	Male	HE9W_E1	PGC	mitotic
AGGGAGTTCAGGTTCA-6	-0.546683	-0.907693	6	9W	Male	HE9W_E1	PGC	Cycling
AGGGATGAGCTACCGC-6	2.00014	2.83544	6	9W	Male	HE9W_E1	PGC	mitotic
AGGGATGCACATTCGA-6	6.66799	1.06681	6	9W	Male	HE9W_E1	PGC	mitotic
AGGGATGGTAAGTTCC-6	1.43512	1.41395	6	9W	Male	HE9W_E1	PGC	mitotic
AGGGTGACAAGCCCAC-6	-1.62631	-2.43718	6	9W	Male	HE9W_E1	PGC	Cycling
AGGGTGATCTGAGGGA-6	5.5846	1.37614	6	9W	Male	HE9W_E1	PGC	mitotic
AGGTCATAGGATCGCA-6	0.413618	-2.19158	6	9W	Male	HE9W_E1	PGC	Cycling
AGGTCATTCTGTCTCG-6	-1.18202	-3.17236	6	9W	Male	HE9W_E1	PGC	Cycling
AGGTCCGCAGTCGTGC-6	1.25261	0.683431	6	9W	Male	HE9W_E1	PGC	mitotic
AGTAGTCCACCCATTC-6	-2.26686	-3.78243	6	9W	Male	HE9W_E1	PGC	Cycling
AGTCTTTAGACAAGCC-6	-2.3838	-3.92409	6	9W	Male	HE9W_E1	PGC	Cycling
AGTCTTTGTGACGCCT-6	3.39167	3.3834	6	9W	Male	HE9W_E1	PGC	mitotic
AGTGAGGAGAGAACAG-6	-2.16441	-2.40727	6	9W	Male	HE9W_E1	PGC	Cycling
AGTGGGAGTAAATACG-6	0.999327	0.811049	6	9W	Male	HE9W_E1	PGC	mitotic
AGTTGGTTCAGGCAAG-6	-2.89041	-3.36359	6	9W	Male	HE9W_E1	PGC	Cycling
AGTTGGTTCCCTTGTG-6	7.26726	0.769319	6	9W	Male	HE9W_E1	PGC	mitotic
ATAACGCTCCTCAACC-6	-2.93293	-3.22927	6	9W	Male	HE9W_E1	PGC	Cycling
ATAAGAGCAGGAATGC-6	7.93399	3.06725	6	9W	Male	HE9W_E1	PGC	mitotic
ATAGACCCATGACGGA-6	-2.97743	-2.58266	6	9W	Male	HE9W_E1	PGC	Cycling
ATCACGAAGCCAGGAT-6	1.60218	1.18452	6	9W	Male	HE9W_E1	PGC	mitotic
ATCATCTTCCAGTAGT-6	0.492325	-0.183159	6	9W	Male	HE9W_E1	PGC	mitotic
ATCATGGTCAAGAAGT-6	3.26822	0.549661	6	9W	Male	HE9W_E1	PGC	mitotic
ATCCACCCAGTCCTTC-6	4.78876	-2.36013	6	9W	Male	HE9W_E1	PGC	mitotic
ATCCACCGTAGCTCCG-6	-2.23313	-1.87116	6	9W	Male	HE9W_E1	PGC	Cycling
ATCCGAAAGTAGATGT-6	2.55079	0.51022	6	9W	Male	HE9W_E1	PGC	mitotic
ATCCGAACAATGACCT-6	-1.42164	-4.03522	6	9W	Male	HE9W_E1	PGC	Cycling
ATCCGAATCAACTCTT-6	6.14638	0.00594297	6	9W	Male	HE9W_E1	PGC	mitotic
ATCGAGTTCCTAGTGA-6	2.49301	-0.124851	6	9W	Male	HE9W_E1	PGC	mitotic
ATCTACTAGATCCTGT-6	-1.66226	-0.891187	6	9W	Male	HE9W_E1	PGC	Cycling
ATCTACTGTCTGCAAT-6	2.65162	-0.752669	6	9W	Male	HE9W_E1	PGC	mitotic
ATCTACTTCAGTACGT-6	-2.23525	-3.9572	6	9W	Male	HE9W_E1	PGC	Cycling
ATCTGCCGTAATCGTC-6	-1.4057	-0.741489	6	9W	Male	HE9W_E1	PGC	Cycling
ATGAGGGCACATTTCT-6	5.96452	1.89632	6	9W	Male	HE9W_E1	PGC	mitotic
ATGCGATGTATATGGA-6	-2.89521	-0.998261	6	9W	Male	HE9W_E1	PGC	Cycling
ATGCGATTCATCGCTC-6	3.02824	4.38151	6	9W	Male	HE9W_E1	PGC	mitotic
ATGTGTGCAAAGCAAT-6	-2.91766	-2.91898	6	9W	Male	HE9W_E1	PGC	Cycling
ATGTGTGTCAGCTTAG-6	0.473134	-0.145439	6	9W	Male	HE9W_E1	PGC	mitotic
ATGTGTGTCTCACATT-6	-3.22329	-2.61995	6	9W	Male	HE9W_E1	PGC	Cycling
ATTACTCAGGAATGGA-6	4.79574	2.91848	6	9W	Male	HE9W_E1	PGC	mitotic
ATTACTCAGTCTCGGC-6	2.15972	2.85577	6	9W	Male	HE9W_E1	PGC	mitotic
ATTACTCCAGGGTTAG-6	-1.35572	-0.798014	6	9W	Male	HE9W_E1	PGC	Cycling
ATTATCCAGATGTGGC-6	-2.76137	-2.40302	6	9W	Male	HE9W_E1	PGC	Cycling
ATTATCCAGCCCGAAA-6	-1.43283	-0.888609	6	9W	Male	HE9W_E1	PGC	Cycling
ATTATCCTCCACGCAG-6	0.50664	-0.312496	6	9W	Male	HE9W_E1	PGC	mitotic
ATTCTACTCCTATGTT-6	-1.9578	-3.80736	6	9W	Male	HE9W_E1	PGC	Cycling
ATTGGACCAAGTTGTC-6	1.5186	0.436153	6	9W	Male	HE9W_E1	PGC	mitotic
ATTTCTGAGCCCAACC-6	0.620463	0.290091	6	9W	Male	HE9W_E1	PGC	mitotic
CAACCTCCACGAAATA-6	5.11224	2.1822	6	9W	Male	HE9W_E1	PGC	mitotic
CAACCTCCATACAGCT-6	-0.719144	-3.40025	6	9W	Male	HE9W_E1	PGC	Cycling
CAACTAGGTTCCACTC-6	2.19468	0.0581826	6	9W	Male	HE9W_E1	PGC	mitotic
CAACTAGTCCAAACAC-6	-2.20229	-2.30476	6	9W	Male	HE9W_E1	PGC	Cycling
CAACTAGTCGCGATCG-6	5.35339	-2.88999	6	9W	Male	HE9W_E1	PGC	mitotic
CAAGAAATCATAGCAC-6	0.939453	1.09525	6	9W	Male	HE9W_E1	PGC	mitotic
CAAGAAATCCGAAGAG-6	-1.95409	-1.19965	6	9W	Male	HE9W_E1	PGC	Cycling
CAAGGCCAGACTTTCG-6	3.03492	2.31397	6	9W	Male	HE9W_E1	PGC	mitotic
CAAGGCCGTCTCTTAT-6	1.84694	2.2116	6	9W	Male	HE9W_E1	PGC	mitotic
CAAGGCCGTGCTAGCC-6	-3.02681	-2.70794	6	9W	Male	HE9W_E1	PGC	Cycling
CAAGGCCTCACAGGCC-6	3.67854	1.33194	6	9W	Male	HE9W_E1	PGC	mitotic
CAAGTTGAGTTATCGC-6	3.6582	0.763545	6	9W	Male	HE9W_E1	PGC	mitotic
CAAGTTGCATCACAAC-6	1.14073	1.87395	6	9W	Male	HE9W_E1	PGC	mitotic
CACAAACTCCGCTGTT-6	-0.348376	0.602489	6	9W	Male	HE9W_E1	PGC	mitotic
CACAAACTCTTCTGGC-6	2.89645	1.85605	6	9W	Male	HE9W_E1	PGC	mitotic
CACAGGCTCTATCCTA-6	1.98706	0.2943	6	9W	Male	HE9W_E1	PGC	mitotic
CACAGGCTCTTCAACT-6	-2.24794	-3.61318	6	9W	Male	HE9W_E1	PGC	Cycling
CACATAGCAACACCTA-6	5.68351	4.91347	6	9W	Male	HE9W_E1	PGC	mitotic
CACATAGGTGCAGTAG-6	-4.9929	1.58731	6	9W	Male	HE9W_E1	PGC	SPARC_Pos
CACATAGGTTATCCGA-6	3.2921	1.89309	6	9W	Male	HE9W_E1	PGC	mitotic
CACCACTTCAAGATCC-6	2.01941	1.40232	6	9W	Male	HE9W_E1	PGC	mitotic
CACCAGGGTCTACCTC-6	0.26982	-2.72883	6	9W	Male	HE9W_E1	PGC	Cycling
CACCTTGGTTCATGGT-6	-3.25411	-1.07355	6	9W	Male	HE9W_E1	PGC	Cycling
CACTCCACACTAAGTC-6	-2.02583	-4.07854	6	9W	Male	HE9W_E1	PGC	Cycling
CAGAATCAGTGCGTGA-6	-2.06664	-1.65565	6	9W	Male	HE9W_E1	PGC	Cycling
CAGAATCCAGTATAAG-6	-2.08009	-3.9657	6	9W	Male	HE9W_E1	PGC	Cycling
CAGAATCGTCTCTCGT-6	-2.67563	-3.1059	6	9W	Male	HE9W_E1	PGC	Cycling
CAGAGAGCATCGGACC-6	2.98091	2.46714	6	9W	Male	HE9W_E1	PGC	mitotic
CAGAGAGGTATTCGTG-6	4.01585	2.35193	6	9W	Male	HE9W_E1	PGC	mitotic
CAGATCAAGACACTAA-6	1.85912	1.74691	6	9W	Male	HE9W_E1	PGC	mitotic
CAGATCAGTTGTACAC-6	1.81517	2.01439	6	9W	Male	HE9W_E1	PGC	mitotic
CAGCAGCAGAACTGTA-6	2.25588	1.89905	6	9W	Male	HE9W_E1	PGC	mitotic
CAGCAGCAGAGTGAGA-6	1.66992	-1.74845	6	9W	Male	HE9W_E1	PGC	mitotic
CAGCAGCCACCGGAAA-6	-3.17256	-2.73772	6	9W	Male	HE9W_E1	PGC	Cycling
CAGCAGCTCGCCAAAT-6	-5.59014	1.28251	6	9W	Male	HE9W_E1	PGC	SPARC_Pos
CAGCATAAGGCCCTCA-6	0.823328	-0.506857	6	9W	Male	HE9W_E1	PGC	Cycling
CAGCATAAGTAGGCCA-6	1.81196	-3.00403	6	9W	Male	HE9W_E1	PGC	Cycling
CAGCCGAAGATGTGGC-6	0.442622	-1.59354	6	9W	Male	HE9W_E1	PGC	mitotic
CAGCCGAGTTCTGAAC-6	6.58804	0.962051	6	9W	Male	HE9W_E1	PGC	mitotic
CAGCGACCAAACGTGG-6	-5.28364	1.78787	6	9W	Male	HE9W_E1	PGC	SPARC_Pos
CAGCGACCAAAGCGGT-6	1.24434	2.26974	6	9W	Male	HE9W_E1	PGC	mitotic
CAGCGACCAACTGCTA-6	-3.63997	-1.61197	6	9W	Male	HE9W_E1	PGC	Cycling
CAGCTAAGTGTCAATC-6	0.811998	1.6641	6	9W	Male	HE9W_E1	PGC	mitotic
CAGCTGGAGCCGTCGT-6	-0.393867	-0.370027	6	9W	Male	HE9W_E1	PGC	Cycling
CAGGTGCGTATATGGA-6	5.1313	5.30058	6	9W	Male	HE9W_E1	PGC	mitotic
CAGTAACCAGTATGCT-6	2.50234	-3.01506	6	9W	Male	HE9W_E1	PGC	Cycling
CAGTAACCATTGAGCT-6	-2.60439	-3.57591	6	9W	Male	HE9W_E1	PGC	Cycling
CATATGGGTAATCACC-6	-2.08688	-1.11694	6	9W	Male	HE9W_E1	PGC	Cycling
CATATGGGTCTACCTC-6	4.84966	-0.357336	6	9W	Male	HE9W_E1	PGC	mitotic
CATATGGTCACATAGC-6	-3.23356	-2.66086	6	9W	Male	HE9W_E1	PGC	Cycling
CATATTCAGCTAGTGG-6	-3.26942	-2.64996	6	9W	Male	HE9W_E1	PGC	Cycling
CATCAAGCACAGGCCT-6	1.67914	1.41091	6	9W	Male	HE9W_E1	PGC	mitotic
CATCAAGTCCGAATGT-6	-0.627767	-1.63181	6	9W	Male	HE9W_E1	PGC	Cycling
CATCAGAAGACAGAGA-6	-2.04808	-2.29387	6	9W	Male	HE9W_E1	PGC	Cycling
CATCAGATCTAACTCT-6	-2.98205	-2.40034	6	9W	Male	HE9W_E1	PGC	Cycling
CATCCACGTAAGTTCC-6	-2.85356	-2.14672	6	9W	Male	HE9W_E1	PGC	Cycling
CATCCACGTGTTCGAT-6	-2.01815	-3.38363	6	9W	Male	HE9W_E1	PGC	Cycling
CATCGAAAGAAAGTGG-6	3.8618	2.45131	6	9W	Male	HE9W_E1	PGC	mitotic
CATCGAAAGGAGTCTG-6	2.4102	2.22841	6	9W	Male	HE9W_E1	PGC	mitotic
CATCGAAGTAGGGACT-6	3.37767	4.2965	6	9W	Male	HE9W_E1	PGC	mitotic
CATCGAAGTTCGGGCT-6	-2.55182	-3.40847	6	9W	Male	HE9W_E1	PGC	Cycling
CATCGGGAGAATAGGG-6	-2.34917	-1.75836	6	9W	Male	HE9W_E1	PGC	Cycling
CATGACAGTTACGACT-6	-4.56008	1.52263	6	9W	Male	HE9W_E1	PGC	SPARC_Pos
CATGCCTCAAGTTAAG-6	3.95163	0.844534	6	9W	Male	HE9W_E1	PGC	mitotic
CATGCCTCACCACGTG-6	4.48597	2.6396	6	9W	Male	HE9W_E1	PGC	mitotic
CATGGCGCATGCGCAC-6	5.13396	-1.87133	6	9W	Male	HE9W_E1	PGC	mitotic
CATGGCGGTCCCTTGT-6	0.481439	-2.40146	6	9W	Male	HE9W_E1	PGC	Cycling
CATGGCGGTGGGTCAA-6	-2.39108	-1.08627	6	9W	Male	HE9W_E1	PGC	Cycling
CATGGCGTCACATACG-6	1.05224	1.83151	6	9W	Male	HE9W_E1	PGC	mitotic
CATTATCAGACCACGA-6	0.606977	1.81701	6	9W	Male	HE9W_E1	PGC	mitotic
CATTATCCACCACCAG-6	1.33847	0.4318	6	9W	Male	HE9W_E1	PGC	mitotic
CATTATCCACGAGAGT-6	-0.538355	-1.2864	6	9W	Male	HE9W_E1	PGC	Cycling
CATTATCGTACTCGCG-6	3.77426	0.086438	6	9W	Male	HE9W_E1	PGC	mitotic
CATTCGCCAAGACGTG-6	1.66204	4.25157	6	9W	Male	HE9W_E1	PGC	mitotic
CCAATCCCACATTCGA-6	0.544296	-0.509319	6	9W	Male	HE9W_E1	PGC	mitotic
CCACCTAAGATATACG-6	0.0307957	-2.42273	6	9W	Male	HE9W_E1	PGC	Cycling
CCACCTAGTAGCGTCC-6	-3.14135	-2.88185	6	9W	Male	HE9W_E1	PGC	Cycling
CCACCTAGTAGCTCCG-6	5.56341	1.1374	6	9W	Male	HE9W_E1	PGC	mitotic
CCACGGAGTCAAACTC-6	-2.80213	-3.10155	6	9W	Male	HE9W_E1	PGC	Cycling
CCACTACGTTACGCGC-6	3.35955	-2.52004	6	9W	Male	HE9W_E1	PGC	Cycling
CCATTCGGTGCAGGTA-6	-1.5413	-2.72194	6	9W	Male	HE9W_E1	PGC	Cycling
CCATTCGTCCGCATCT-6	2.86512	2.55735	6	9W	Male	HE9W_E1	PGC	mitotic
CCCAGTTCAGAAGCAC-6	-2.11026	-3.3992	6	9W	Male	HE9W_E1	PGC	Cycling
CCCAGTTGTGTCGCTG-6	-1.58618	-1.42149	6	9W	Male	HE9W_E1	PGC	Cycling
CCCATACCATAGTAAG-6	0.863563	-1.0728	6	9W	Male	HE9W_E1	PGC	mitotic
CCCATACTCGTTTAGG-6	0.75344	-0.347426	6	9W	Male	HE9W_E1	PGC	mitotic
CCCTCCTAGCTAAGAT-6	-2.61344	-2.7145	6	9W	Male	HE9W_E1	PGC	Cycling
CCGGGATGTTTAGCTG-6	-1.18208	-0.936737	6	9W	Male	HE9W_E1	PGC	Cycling
CCGGGATTCATCTGTT-6	3.05692	-2.44443	6	9W	Male	HE9W_E1	PGC	Cycling
CCGGTAGCAGGCTGAA-6	-2.03342	-2.6938	6	9W	Male	HE9W_E1	PGC	Cycling
CCGGTAGGTAGGACAC-6	4.92651	2.50253	6	9W	Male	HE9W_E1	PGC	mitotic
CCGGTAGGTCAGGACA-6	0.172074	-1.18253	6	9W	Male	HE9W_E1	PGC	Cycling
CCGTACTGTGATAAAC-6	2.38299	0.473286	6	9W	Male	HE9W_E1	PGC	mitotic
CCGTGGAAGAGCTATA-6	4.58643	-1.35566	6	9W	Male	HE9W_E1	PGC	mitotic
CCGTGGAGTAGGGTAC-6	1.43654	1.56274	6	9W	Male	HE9W_E1	PGC	mitotic
CCGTTCAAGCTCAACT-6	-2.62174	-3.48772	6	9W	Male	HE9W_E1	PGC	Cycling
CCGTTCATCAGCTCTC-6	5.58703	4.83238	6	9W	Male	HE9W_E1	PGC	mitotic
CCGTTCATCGTATCAG-6	-1.53896	-1.54354	6	9W	Male	HE9W_E1	PGC	Cycling
CCTAAAGCAAGCCGCT-6	4.07471	1.48575	6	9W	Male	HE9W_E1	PGC	mitotic
CCTAAAGCACCCATTC-6	2.17672	2.43707	6	9W	Male	HE9W_E1	PGC	mitotic
CCTAAAGTCTGAGGGA-6	-1.87591	-1.34645	6	9W	Male	HE9W_E1	PGC	Cycling
CCTACACCATGCAACT-6	3.84518	3.78084	6	9W	Male	HE9W_E1	PGC	mitotic
CCTACACTCAAACCAC-6	-1.91355	-1.53223	6	9W	Male	HE9W_E1	PGC	Cycling
CCTACCATCTTGAGGT-6	-3.16562	-2.74533	6	9W	Male	HE9W_E1	PGC	Cycling
CCTAGCTTCAACCAAC-6	3.26873	1.69651	6	9W	Male	HE9W_E1	PGC	mitotic
CCTATTAAGCGTTTAC-6	-1.2761	-1.13829	6	9W	Male	HE9W_E1	PGC	Cycling
CCTATTACAGGATTGG-6	7.30656	4.16886	6	9W	Male	HE9W_E1	PGC	mitotic
CCTCTGAGTTCAGGCC-6	-1.35362	-1.71514	6	9W	Male	HE9W_E1	PGC	Cycling
CCTTACGGTTTGTTTC-6	2.87294	2.54419	6	9W	Male	HE9W_E1	PGC	mitotic
CCTTACGTCAACCATG-6	-2.69226	-2.67755	6	9W	Male	HE9W_E1	PGC	Cycling
CCTTCCCAGCAGCGTA-6	-0.0502071	-0.700207	6	9W	Male	HE9W_E1	PGC	mitotic
CCTTCCCGTCCAACTA-6	1.58936	-0.243971	6	9W	Male	HE9W_E1	PGC	mitotic
CCTTCGAAGAGTACAT-6	0.295327	0.418616	6	9W	Male	HE9W_E1	PGC	mitotic
CCTTCGACACCAACCG-6	3.38241	4.0539	6	9W	Male	HE9W_E1	PGC	mitotic
CCTTCGAGTATAATGG-6	-1.19591	-1.96101	6	9W	Male	HE9W_E1	PGC	Cycling
CCTTTCTCAATCGGTT-6	0.0741935	-1.17658	6	9W	Male	HE9W_E1	PGC	Cycling
CCTTTCTTCCGTTGTC-6	-1.92246	-3.38522	6	9W	Male	HE9W_E1	PGC	Cycling
CGAACATTCAGGCAAG-6	-5.73902	2.09624	6	9W	Male	HE9W_E1	PGC	SPARC_Pos
CGAATGTAGCTAGGCA-6	3.73074	4.92108	6	9W	Male	HE9W_E1	PGC	mitotic
CGACCTTTCTACGAGT-6	2.10542	3.79801	6	9W	Male	HE9W_E1	PGC	mitotic
CGAGCACTCCAAATGC-6	-1.02358	-1.38896	6	9W	Male	HE9W_E1	PGC	Cycling
CGAGCCACAAGACACG-6	-1.08233	-1.27266	6	9W	Male	HE9W_E1	PGC	Cycling
CGATCGGTCAACACGT-6	2.16179	0.893595	6	9W	Male	HE9W_E1	PGC	mitotic
CGATGGCCAGACGCAA-6	-3.41132	-1.17726	6	9W	Male	HE9W_E1	PGC	Cycling
CGATGTAAGACTAGAT-6	3.17388	1.81902	6	9W	Male	HE9W_E1	PGC	mitotic
CGATGTACATCGGAAG-6	1.34069	2.70582	6	9W	Male	HE9W_E1	PGC	mitotic
CGATGTAGTGTGCCTG-6	0.316398	-2.17733	6	9W	Male	HE9W_E1	PGC	mitotic
CGATGTAGTTCAACCA-6	1.9804	2.20818	6	9W	Male	HE9W_E1	PGC	mitotic
CGATTGAAGGGTATCG-6	5.3236	2.0831	6	9W	Male	HE9W_E1	PGC	mitotic
CGCCAAGAGCGTTTAC-6	-2.0802	-2.91036	6	9W	Male	HE9W_E1	PGC	Cycling
CGCCAAGCATACGCTA-6	-4.78418	2.34986	6	9W	Male	HE9W_E1	PGC	mitotic
CGCCAAGTCGCAAACT-6	-2.08627	-3.99281	6	9W	Male	HE9W_E1	PGC	Cycling
CGCGGTAGTGGCGAAT-6	4.02433	3.98837	6	9W	Male	HE9W_E1	PGC	mitotic
CGCGTTTCAGACAGGT-6	1.01408	2.11703	6	9W	Male	HE9W_E1	PGC	mitotic
CGCGTTTCAGCTGCAC-6	0.321875	-1.7762	6	9W	Male	HE9W_E1	PGC	Cycling
CGCTATCTCTACCTGC-6	-1.34418	-1.84183	6	9W	Male	HE9W_E1	PGC	Cycling
CGCTTCAAGACCTAGG-6	3.75341	1.60587	6	9W	Male	HE9W_E1	PGC	mitotic
CGCTTCAAGAGAGCTC-6	3.35066	1.8039	6	9W	Male	HE9W_E1	PGC	mitotic
CGCTTCAGTGTCAATC-6	-1.91924	-2.44951	6	9W	Male	HE9W_E1	PGC	Cycling
CGCTTCATCCACTGGG-6	3.79797	2.01219	6	9W	Male	HE9W_E1	PGC	mitotic
CGGACACAGGAGCGAG-6	-0.904303	-0.485742	6	9W	Male	HE9W_E1	PGC	Cycling
CGGACGTAGCAGCCTC-6	-2.83647	-3.39966	6	9W	Male	HE9W_E1	PGC	Cycling
CGGACGTTCATCTGTT-6	8.74889	3.25507	6	9W	Male	HE9W_E1	PGC	mitotic
CGGAGCTCATCTGGTA-6	-2.13863	-2.25412	6	9W	Male	HE9W_E1	PGC	Cycling
CGGAGCTTCAGTCCCT-6	4.94973	4.10413	6	9W	Male	HE9W_E1	PGC	mitotic
CGGAGTCCATCGGGTC-6	3.30192	-1.30377	6	9W	Male	HE9W_E1	PGC	mitotic
CGGAGTCGTATAGGGC-6	-2.20054	-3.90471	6	9W	Male	HE9W_E1	PGC	Cycling
CGGCTAGCACATCTTT-6	3.14463	3.66372	6	9W	Male	HE9W_E1	PGC	mitotic
CGGCTAGCAGCGTAAG-6	1.33575	1.45361	6	9W	Male	HE9W_E1	PGC	mitotic
CGGCTAGGTCCGTGAC-6	2.98715	2.34247	6	9W	Male	HE9W_E1	PGC	mitotic
CGGGTCATCGCTTAGA-6	2.59511	-0.23445	6	9W	Male	HE9W_E1	PGC	mitotic
CGGTTAATCATACGGT-6	8.23994	-1.54512	6	9W	Male	HE9W_E1	PGC	mitotic
CGTAGCGTCGATAGAA-6	3.88578	1.38933	6	9W	Male	HE9W_E1	PGC	mitotic
CGTAGGCAGCTGAAAT-6	2.26101	1.33616	6	9W	Male	HE9W_E1	PGC	mitotic
CGTAGGCCATCCCATC-6	1.26956	2.2489	6	9W	Male	HE9W_E1	PGC	mitotic
CGTCACTCATTACGAC-6	-1.96572	-1.98407	6	9W	Male	HE9W_E1	PGC	Cycling
CGTCAGGGTGTTAAGA-6	5.0718	2.1868	6	9W	Male	HE9W_E1	PGC	mitotic
CGTCAGGTCGGTTCGG-6	1.32691	2.4149	6	9W	Male	HE9W_E1	PGC	mitotic
CGTCTACCAGGTGGAT-6	-1.14358	-4.51881	6	9W	Male	HE9W_E1	PGC	Cycling
CGTCTACGTAGAGCTG-6	4.5115	-0.480725	6	9W	Male	HE9W_E1	PGC	mitotic
CGTGAGCCATTGCGGC-6	2.01761	0.745779	6	9W	Male	HE9W_E1	PGC	mitotic
CGTGTAAAGTAAGTAC-6	4.94463	3.26951	6	9W	Male	HE9W_E1	PGC	mitotic
CGTGTAAGTTACTGAC-6	6.47192	-2.18954	6	9W	Male	HE9W_E1	PGC	mitotic
CGTTAGAGTCAACTGT-6	-2.07583	-2.547	6	9W	Male	HE9W_E1	PGC	Cycling
CGTTAGATCAGTCAGT-6	-1.05717	-2.33051	6	9W	Male	HE9W_E1	PGC	Cycling
CGTTCTGGTAGCTAAA-6	1.39739	2.30999	6	9W	Male	HE9W_E1	PGC	mitotic
CGTTCTGTCGGAGGTA-6	1.52044	1.37731	6	9W	Male	HE9W_E1	PGC	mitotic
CGTTGGGGTTACCAGT-6	3.58687	0.938364	6	9W	Male	HE9W_E1	PGC	mitotic
CGTTGGGTCGGTCCGA-6	2.54586	0.192118	6	9W	Male	HE9W_E1	PGC	mitotic
CGTTGGGTCTGCAAGT-6	1.78712	2.36332	6	9W	Male	HE9W_E1	PGC	mitotic
CTAACTTGTAGAGGAA-6	-3.01248	-2.8451	6	9W	Male	HE9W_E1	PGC	Cycling
CTAAGACCAAGCCTAT-6	1.37391	-2.21957	6	9W	Male	HE9W_E1	PGC	Cycling
CTAAGACGTCTCATCC-6	-1.22822	-4.1099	6	9W	Male	HE9W_E1	PGC	Cycling
CTAAGACTCTCGTTTA-6	0.714912	0.373335	6	9W	Male	HE9W_E1	PGC	mitotic
CTAATGGAGGATTCGG-6	4.21082	3.87795	6	9W	Male	HE9W_E1	PGC	mitotic
CTAATGGAGTTCGATC-6	1.27935	1.35924	6	9W	Male	HE9W_E1	PGC	mitotic
CTACACCCATGATCCA-6	-1.61365	-0.021274	6	9W	Male	HE9W_E1	PGC	mitotic
CTACACCGTGAGGCTA-6	-0.95169	-4.22403	6	9W	Male	HE9W_E1	PGC	Cycling
CTACACCTCAACTCTT-6	0.680565	0.357889	6	9W	Male	HE9W_E1	PGC	mitotic
CTACATTCAGGTGCCT-6	1.00261	1.12572	6	9W	Male	HE9W_E1	PGC	mitotic
CTACCCAAGGCTATCT-6	0.953106	2.87704	6	9W	Male	HE9W_E1	PGC	mitotic
CTACGTCTCACTCCTG-6	4.26766	5.1882	6	9W	Male	HE9W_E1	PGC	mitotic
CTACGTCTCTTCGAGA-6	-1.6789	-1.66256	6	9W	Male	HE9W_E1	PGC	Cycling
CTAGAGTGTCTTGATG-6	4.4977	1.3357	6	9W	Male	HE9W_E1	PGC	mitotic
CTAGAGTGTTGCCTCT-6	3.08138	1.54309	6	9W	Male	HE9W_E1	PGC	mitotic
CTAGAGTTCTGCTGTC-6	-1.99709	-1.10815	6	9W	Male	HE9W_E1	PGC	Cycling
CTAGTGAAGCTAGCCC-6	-2.51901	-1.71371	6	9W	Male	HE9W_E1	PGC	Cycling
CTAGTGAGTTGTGGAG-6	1.83803	3.17465	6	9W	Male	HE9W_E1	PGC	mitotic
CTCACACAGCCACCTG-6	5.18578	-0.641998	6	9W	Male	HE9W_E1	PGC	mitotic
CTCAGAAAGTCGCCGT-6	-1.78115	-0.63434	6	9W	Male	HE9W_E1	PGC	Cycling
CTCAGAACAGCTATTG-6	-2.23864	-2.56425	6	9W	Male	HE9W_E1	PGC	Cycling
CTCAGAACATCGGACC-6	-2.05531	-4.19035	6	9W	Male	HE9W_E1	PGC	Cycling
CTCATTAAGTGGACGT-6	1.01625	2.85742	6	9W	Male	HE9W_E1	PGC	mitotic
CTCATTAGTGCAACGA-6	-0.838948	0.146156	6	9W	Male	HE9W_E1	PGC	Cycling
CTCCTAGTCACGATGT-6	4.31951	2.91268	6	9W	Male	HE9W_E1	PGC	mitotic
CTCGGAGTCCGCTGTT-6	-2.11141	-1.29091	6	9W	Male	HE9W_E1	PGC	Cycling
CTCGGAGTCTCCAGGG-6	-2.72184	-2.38973	6	9W	Male	HE9W_E1	PGC	Cycling
CTCGGGATCGGTCTAA-6	-1.75215	-5.85447	6	9W	Male	HE9W_E1	PGC	Cycling
CTCGTCAAGGCATGGT-6	3.74948	5.38513	6	9W	Male	HE9W_E1	PGC	mitotic
CTCTAATCAGTGACAG-6	1.81447	3.09266	6	9W	Male	HE9W_E1	PGC	mitotic
CTCTACGAGATACACA-6	-9.34197	-6.29314	6	9W	Male	HE9W_E1	PGC	mitotic
CTCTGGTCAAGTCATC-6	-2.53754	-3.00367	6	9W	Male	HE9W_E1	PGC	Cycling
CTGAAACAGCGGATCA-6	2.56366	0.475196	6	9W	Male	HE9W_E1	PGC	mitotic
CTGAAGTAGATATGGT-6	-0.391885	-0.541978	6	9W	Male	HE9W_E1	PGC	mitotic
CTGAAGTGTCTAGTGT-6	7.7957	2.72634	6	9W	Male	HE9W_E1	PGC	mitotic
CTGAAGTGTGCGCTTG-6	2.32432	1.90641	6	9W	Male	HE9W_E1	PGC	mitotic
CTGATAGAGCCAGAAC-6	1.89421	2.15139	6	9W	Male	HE9W_E1	PGC	mitotic
CTGCCTAAGCTGTTCA-6	-5.37348	1.51943	6	9W	Male	HE9W_E1	PGC	SPARC_Pos
CTGCCTACAGCCTATA-6	2.72382	-0.992936	6	9W	Male	HE9W_E1	PGC	mitotic
CTGCCTAGTCTGGTCG-6	3.49357	3.37889	6	9W	Male	HE9W_E1	PGC	mitotic
CTGCGGACAAACTGTC-6	-2.29434	-1.74584	6	9W	Male	HE9W_E1	PGC	Cycling
CTGCGGATCACGCGGT-6	1.51041	0.581199	6	9W	Male	HE9W_E1	PGC	mitotic
CTGCGGATCAGGCAAG-6	1.28665	1.70322	6	9W	Male	HE9W_E1	PGC	mitotic
CTGCTGTCATGAACCT-6	3.77174	1.07243	6	9W	Male	HE9W_E1	PGC	mitotic
CTGGTCTCAATAGCAA-6	0.322578	1.13767	6	9W	Male	HE9W_E1	PGC	mitotic
CTGTGCTAGCAAATCA-6	3.64018	4.51466	6	9W	Male	HE9W_E1	PGC	mitotic
CTGTTTAAGGTTACCT-6	-0.00036781	1.12219	6	9W	Male	HE9W_E1	PGC	mitotic
CTGTTTATCGCGGATC-6	1.90096	0.0233363	6	9W	Male	HE9W_E1	PGC	mitotic
CTTAACTCACCAGATT-6	2.67045	-0.657774	6	9W	Male	HE9W_E1	PGC	mitotic
CTTGGCTCATGGATGG-6	-3.04678	-2.86749	6	9W	Male	HE9W_E1	PGC	Cycling
CTTGGCTGTCTGCCAG-6	-2.33341	-1.82467	6	9W	Male	HE9W_E1	PGC	Cycling
CTTGGCTTCACCGGGT-6	-2.75092	2.13821	6	9W	Male	HE9W_E1	PGC	mitotic
CTTTGCGAGAAGGGTA-6	5.13494	3.1364	6	9W	Male	HE9W_E1	PGC	mitotic
CTTTGCGAGATGTGGC-6	-3.02352	-2.73922	6	9W	Male	HE9W_E1	PGC	Cycling
CTTTGCGGTGTGCGTC-6	2.58769	2.5359	6	9W	Male	HE9W_E1	PGC	mitotic
GAAACTCAGGACAGCT-6	2.20385	1.61812	6	9W	Male	HE9W_E1	PGC	mitotic
GAAACTCAGGCTAGCA-6	-0.817667	-2.83411	6	9W	Male	HE9W_E1	PGC	Cycling
GAAACTCTCATTTGGG-6	0.795587	-0.102345	6	9W	Male	HE9W_E1	PGC	mitotic
GAAATGAAGGACCACA-6	3.23125	1.34755	6	9W	Male	HE9W_E1	PGC	mitotic
GAAATGACAACTGCGC-6	0.439106	1.06607	6	9W	Male	HE9W_E1	PGC	mitotic
GAACGGACATGCTGGC-6	2.0048	2.18852	6	9W	Male	HE9W_E1	PGC	mitotic
GAAGCAGCATGACGGA-6	-1.59463	-2.90012	6	9W	Male	HE9W_E1	PGC	Cycling
GAATAAGGTGTTCTTT-6	2.43812	2.06592	6	9W	Male	HE9W_E1	PGC	mitotic
GAATAAGTCGGAGGTA-6	4.86471	4.02998	6	9W	Male	HE9W_E1	PGC	mitotic
GAATGAACACCGATAT-6	1.26953	0.965095	6	9W	Male	HE9W_E1	PGC	mitotic
GAATGAACAGCGATCC-6	-0.753264	0.107506	6	9W	Male	HE9W_E1	PGC	Cycling
GAATGAAGTGCTAGCC-6	-2.73905	-1.95311	6	9W	Male	HE9W_E1	PGC	Cycling
GAATGAATCTCTTATG-6	4.25691	-1.76211	6	9W	Male	HE9W_E1	PGC	mitotic
GACACGCAGAGACTAT-6	0.878743	-2.27251	6	9W	Male	HE9W_E1	PGC	Cycling
GACACGCGTGTAACGG-6	-2.3046	-3.43631	6	9W	Male	HE9W_E1	PGC	Cycling
GACAGAGAGTGGCACA-6	0.192764	1.45934	6	9W	Male	HE9W_E1	PGC	mitotic
GACAGAGTCTTCCTTC-6	-3.05723	-2.76193	6	9W	Male	HE9W_E1	PGC	Cycling
GACCTGGAGGTGACCA-6	1.33791	1.54159	6	9W	Male	HE9W_E1	PGC	mitotic
GACGCGTAGTGTCCCG-6	-1.52521	-2.83379	6	9W	Male	HE9W_E1	PGC	Cycling
GACGTGCTCAAACCAC-6	2.47058	1.43816	6	9W	Male	HE9W_E1	PGC	mitotic
GACGTGCTCGCACTCT-6	-2.19929	-1.09704	6	9W	Male	HE9W_E1	PGC	Cycling
GACGTTAGTCTCTCGT-6	3.36068	3.27757	6	9W	Male	HE9W_E1	PGC	mitotic
GACTAACTCCTAGGGC-6	0.717522	0.780334	6	9W	Male	HE9W_E1	PGC	mitotic
GACTACACAGTATGCT-6	3.73461	-1.63858	6	9W	Male	HE9W_E1	PGC	mitotic
GACTACATCAGGTAAA-6	1.35309	1.08546	6	9W	Male	HE9W_E1	PGC	mitotic
GACTGCGCAGCGATCC-6	-2.93944	-2.82818	6	9W	Male	HE9W_E1	PGC	Cycling
GAGCAGAGTACAGCAG-6	1.65444	-0.834106	6	9W	Male	HE9W_E1	PGC	mitotic
GAGCAGATCCTCGCAT-6	7.75576	0.612103	6	9W	Male	HE9W_E1	PGC	mitotic
GAGGTGAAGCGATAGC-6	1.06572	-1.74427	6	9W	Male	HE9W_E1	PGC	mitotic
GAGGTGAAGTGTTGAA-6	2.44843	2.38747	6	9W	Male	HE9W_E1	PGC	mitotic
GAGTCCGTCTAACGGT-6	0.6411	-0.527182	6	9W	Male	HE9W_E1	PGC	mitotic
GATCAGTCAAGAAGAG-6	-1.426	-1.98104	6	9W	Male	HE9W_E1	PGC	Cycling
GATCAGTCAGCTGGCT-6	-0.714273	-0.616941	6	9W	Male	HE9W_E1	PGC	Cycling
GATCAGTGTACTCAAC-6	-0.297996	0.0431751	6	9W	Male	HE9W_E1	PGC	mitotic
GATCAGTTCATACGGT-6	-2.76365	-2.66624	6	9W	Male	HE9W_E1	PGC	Cycling
GATCAGTTCGAACTGT-6	-1.30428	-1.08438	6	9W	Male	HE9W_E1	PGC	Cycling
GATCGATTCAAAGTAG-6	7.55704	3.17653	6	9W	Male	HE9W_E1	PGC	mitotic
GATCGCGCACACAGAG-6	6.7501	2.53386	6	9W	Male	HE9W_E1	PGC	mitotic
GATCGTAAGATTACCC-6	-5.06205	1.99395	6	9W	Male	HE9W_E1	PGC	SPARC_Pos
GATCGTAAGCACCGCT-6	-0.49788	-0.444224	6	9W	Male	HE9W_E1	PGC	Cycling
GATCTAGGTCGGCATC-6	1.65969	1.24415	6	9W	Male	HE9W_E1	PGC	mitotic
GATCTAGTCAGAGACG-6	-2.8101	-3.3878	6	9W	Male	HE9W_E1	PGC	Cycling
GATGAAACACCAGGTC-6	3.14897	2.01694	6	9W	Male	HE9W_E1	PGC	mitotic
GATGAAAGTGCCTGCA-6	-1.80494	-1.14591	6	9W	Male	HE9W_E1	PGC	Cycling
GATGAGGCACAACTGT-6	3.83579	0.917781	6	9W	Male	HE9W_E1	PGC	mitotic
GATGAGGGTCTAGCCG-6	-5.77407	1.48496	6	9W	Male	HE9W_E1	PGC	SPARC_Pos
GATTCAGGTGCACCAC-6	4.48283	-1.67659	6	9W	Male	HE9W_E1	PGC	mitotic
GCAAACTCAAACTGTC-6	1.57329	-1.05412	6	9W	Male	HE9W_E1	PGC	mitotic
GCAAACTGTTAGTGGG-6	-3.49094	-0.679839	6	9W	Male	HE9W_E1	PGC	Cycling
GCAAACTTCATCGATG-6	1.03648	2.21171	6	9W	Male	HE9W_E1	PGC	mitotic
GCAAACTTCCAAGCCG-6	4.13634	3.60579	6	9W	Male	HE9W_E1	PGC	mitotic
GCAATCATCGAACTGT-6	1.98752	3.01723	6	9W	Male	HE9W_E1	PGC	mitotic
GCACTCTGTTACCAGT-6	3.39633	4.19454	6	9W	Male	HE9W_E1	PGC	mitotic
GCACTCTTCGGCATCG-6	-1.96339	-0.983796	6	9W	Male	HE9W_E1	PGC	Cycling
GCAGCCACACCCAGTG-6	1.82548	2.67744	6	9W	Male	HE9W_E1	PGC	mitotic
GCAGCCAGTCATGCAT-6	5.48865	1.60189	6	9W	Male	HE9W_E1	PGC	mitotic
GCAGCCATCAGCCTAA-6	2.35935	1.50594	6	9W	Male	HE9W_E1	PGC	mitotic
GCAGTTACAATGAATG-6	-3.20616	-2.60274	6	9W	Male	HE9W_E1	PGC	Cycling
GCATACAGTGGCAAAC-6	2.54815	0.201274	6	9W	Male	HE9W_E1	PGC	mitotic
GCATACAGTTGTACAC-6	3.72579	0.170047	6	9W	Male	HE9W_E1	PGC	mitotic
GCATGCGGTCGACTGC-6	-3.02579	-1.54465	6	9W	Male	HE9W_E1	PGC	Cycling
GCATGTAAGCGAAGGG-6	4.40914	2.69605	6	9W	Male	HE9W_E1	PGC	mitotic
GCATGTACATTGTGCA-6	2.51754	2.43495	6	9W	Male	HE9W_E1	PGC	mitotic
GCATGTATCTTTAGGG-6	-3.22737	2.65232	6	9W	Male	HE9W_E1	PGC	mitotic
GCCTCTATCACCTCGT-6	-1.5665	-3.48638	6	9W	Male	HE9W_E1	PGC	Cycling
GCCTCTATCCAGGGCT-6	-2.12191	-3.37922	6	9W	Male	HE9W_E1	PGC	Cycling
GCGACCACAAGCCATT-6	-0.632884	-2.96866	6	9W	Male	HE9W_E1	PGC	Cycling
GCGACCAGTGCGGTAA-6	2.83605	4.45148	6	9W	Male	HE9W_E1	PGC	mitotic
GCGACCATCTTGGGTA-6	-1.08547	-1.84649	6	9W	Male	HE9W_E1	PGC	Cycling
GCGAGAAGTCTGCGGT-6	-1.98748	-1.21541	6	9W	Male	HE9W_E1	PGC	Cycling
GCGCAACCAGCTATTG-6	-2.3047	-2.63478	6	9W	Male	HE9W_E1	PGC	Cycling
GCGCAACCAGTAAGAT-6	-1.87597	-1.71272	6	9W	Male	HE9W_E1	PGC	Cycling
GCGCAGTAGCCTTGAT-6	4.51815	1.81145	6	9W	Male	HE9W_E1	PGC	mitotic
GCGCAGTAGGCTCATT-6	0.652139	0.357764	6	9W	Male	HE9W_E1	PGC	mitotic
GCGCAGTTCTAACCGA-6	4.51641	0.280225	6	9W	Male	HE9W_E1	PGC	mitotic
GCGCCAATCAATCTCT-6	3.41189	1.05298	6	9W	Male	HE9W_E1	PGC	mitotic
GCGCGATTCCGCGGTA-6	0.852089	0.824742	6	9W	Male	HE9W_E1	PGC	mitotic
GCGGGTTCACTGCCAG-6	-2.46587	-1.77568	6	9W	Male	HE9W_E1	PGC	Cycling
GCGGGTTGTCACCCAG-6	1.29482	2.04819	6	9W	Male	HE9W_E1	PGC	mitotic
GCGGGTTGTTAAGGGC-6	-2.64068	-2.05574	6	9W	Male	HE9W_E1	PGC	Cycling
GCTCCTAAGTAACCCT-6	0.475055	1.3946	6	9W	Male	HE9W_E1	PGC	mitotic
GCTCCTAGTCGAAAGC-6	2.16021	1.21546	6	9W	Male	HE9W_E1	PGC	mitotic
GCTCCTATCGGCGCAT-6	0.367242	0.313785	6	9W	Male	HE9W_E1	PGC	mitotic
GCTCTGTAGAGGACGG-6	1.58872	2.1824	6	9W	Male	HE9W_E1	PGC	mitotic
GCTCTGTAGGTGATAT-6	-0.291909	0.453228	6	9W	Male	HE9W_E1	PGC	mitotic
GCTGCAGGTCCAGTAT-6	-1.49445	-4.27352	6	9W	Male	HE9W_E1	PGC	Cycling
GCTGCGAAGCTCCTTC-6	-2.48924	-3.99456	6	9W	Male	HE9W_E1	PGC	Cycling
GCTGCGACAGGGAGAG-6	5.22836	3.62187	6	9W	Male	HE9W_E1	PGC	mitotic
GCTGCGAGTGGCGAAT-6	-4.60935	0.609025	6	9W	Male	HE9W_E1	PGC	SPARC_Pos
GCTGCTTAGAAAGTGG-6	1.85944	-2.07729	6	9W	Male	HE9W_E1	PGC	mitotic
GCTGCTTAGCTGTTCA-6	6.69459	3.13646	6	9W	Male	HE9W_E1	PGC	mitotic
GCTTCCACAATAAGCA-6	2.26014	-3.07894	6	9W	Male	HE9W_E1	PGC	Cycling
GCTTGAAAGTACACCT-6	-2.84906	-2.90897	6	9W	Male	HE9W_E1	PGC	Cycling
GGAAAGCAGGAGCGTT-6	-2.92143	-2.81535	6	9W	Male	HE9W_E1	PGC	Cycling
GGAAAGCGTATAGGTA-6	1.3618	2.73225	6	9W	Male	HE9W_E1	PGC	mitotic
GGAAAGCGTATGAATG-6	4.82713	2.69638	6	9W	Male	HE9W_E1	PGC	mitotic
GGAAAGCTCCTCCTAG-6	3.47919	1.38877	6	9W	Male	HE9W_E1	PGC	mitotic
GGAAAGCTCGGTTCGG-6	3.73003	-0.722003	6	9W	Male	HE9W_E1	PGC	mitotic
GGAACTTAGTCTCAAC-6	-3.25545	-2.59844	6	9W	Male	HE9W_E1	PGC	Cycling
GGAACTTCAAGCGTAG-6	-1.89251	-4.46036	6	9W	Male	HE9W_E1	PGC	Cycling
GGAATAAAGGACACCA-6	5.11527	-2.92924	6	9W	Male	HE9W_E1	PGC	mitotic
GGAATAATCTATGTGG-6	3.38982	1.29665	6	9W	Male	HE9W_E1	PGC	mitotic
GGACAAGCAAGCCTAT-6	7.21165	1.53973	6	9W	Male	HE9W_E1	PGC	mitotic
GGACAAGCAATCGAAA-6	-2.66375	-2.87215	6	9W	Male	HE9W_E1	PGC	Cycling
GGACAAGTCAGCTGGC-6	2.22683	2.01607	6	9W	Male	HE9W_E1	PGC	mitotic
GGACAGAGTCTGCGGT-6	5.78224	1.53254	6	9W	Male	HE9W_E1	PGC	mitotic
GGACATTAGTGACTCT-6	1.0332	0.935234	6	9W	Male	HE9W_E1	PGC	mitotic
GGACATTCACAGGCCT-6	0.0850381	1.58098	6	9W	Male	HE9W_E1	PGC	mitotic
GGACGTCCATGCGCAC-6	1.2988	0.570459	6	9W	Male	HE9W_E1	PGC	mitotic
GGACGTCGTGCGAAAC-6	-2.01541	-2.39543	6	9W	Male	HE9W_E1	PGC	Cycling
GGACGTCTCCAGAGGA-6	3.7502	3.47059	6	9W	Male	HE9W_E1	PGC	mitotic
GGATGTTAGCGACGTA-6	5.09521	2.63452	6	9W	Male	HE9W_E1	PGC	mitotic
GGATGTTCACAACGTT-6	1.08603	1.73611	6	9W	Male	HE9W_E1	PGC	mitotic
GGATGTTGTGATGCCC-6	-1.48447	-3.54299	6	9W	Male	HE9W_E1	PGC	Cycling
GGATTACGTAGTACCT-6	1.89457	-0.280131	6	9W	Male	HE9W_E1	PGC	mitotic
GGCCGATAGACTTTCG-6	7.70595	0.367243	6	9W	Male	HE9W_E1	PGC	mitotic
GGCCGATCAAGTACCT-6	1.29617	1.27359	6	9W	Male	HE9W_E1	PGC	mitotic
GGCCGATCAATCCGAT-6	2.66095	-0.670337	6	9W	Male	HE9W_E1	PGC	mitotic
GGCGACTTCCTTAATC-6	3.26188	1.98659	6	9W	Male	HE9W_E1	PGC	mitotic
GGCGTGTTCATGCATG-6	4.5472	1.22206	6	9W	Male	HE9W_E1	PGC	mitotic
GGCTCGAAGAGGACGG-6	1.10953	0.193333	6	9W	Male	HE9W_E1	PGC	mitotic
GGCTCGATCACGACTA-6	6.20825	2.66933	6	9W	Male	HE9W_E1	PGC	mitotic
GGCTGGTAGTTCGATC-6	-5.20114	0.928464	6	9W	Male	HE9W_E1	PGC	SPARC_Pos
GGGAATGTCAACTCTT-6	0.211372	1.12406	6	9W	Male	HE9W_E1	PGC	mitotic
GGGAGATAGCTACCTA-6	4.80964	0.396948	6	9W	Male	HE9W_E1	PGC	mitotic
GGGATGAGTGACCAAG-6	3.29984	-0.959147	6	9W	Male	HE9W_E1	PGC	mitotic
GGGATGAGTGCAGACA-6	-0.711263	-3.15587	6	9W	Male	HE9W_E1	PGC	Cycling
GGGATGATCTGCAAGT-6	-4.77702	2.35322	6	9W	Male	HE9W_E1	PGC	SPARC_Pos
GGGCACTCAGCGAACA-6	2.67182	-3.17123	6	9W	Male	HE9W_E1	PGC	mitotic
GGGCACTTCAAGAAGT-6	-2.09286	-1.95682	6	9W	Male	HE9W_E1	PGC	Cycling
GGGTTGCCAAGGTGTG-6	0.874212	2.7957	6	9W	Male	HE9W_E1	PGC	mitotic
GGGTTGCGTAGCAAAT-6	3.00333	3.15744	6	9W	Male	HE9W_E1	PGC	mitotic
GGTGAAGGTTTGACTG-6	4.13866	3.6769	6	9W	Male	HE9W_E1	PGC	mitotic
GGTGCGTTCCTGCCAT-6	-0.0301354	0.198363	6	9W	Male	HE9W_E1	PGC	mitotic
GGTGCGTTCTTCTGGC-6	3.40075	0.207906	6	9W	Male	HE9W_E1	PGC	mitotic
GGTGTTACACAGCCCA-6	1.02438	2.52407	6	9W	Male	HE9W_E1	PGC	mitotic
GTAACGTCAACCGCCA-6	3.146	-0.597578	6	9W	Male	HE9W_E1	PGC	mitotic
GTAACGTGTCAGAATA-6	-2.49819	0.232322	6	9W	Male	HE9W_E1	PGC	mitotic
GTAACGTTCTGCCCTA-6	5.46015	4.35198	6	9W	Male	HE9W_E1	PGC	mitotic
GTAACTGAGAAAGTGG-6	-2.15902	-1.84536	6	9W	Male	HE9W_E1	PGC	Cycling
GTAACTGGTTCGGCAC-6	-2.73319	-2.98319	6	9W	Male	HE9W_E1	PGC	Cycling
GTACGTAGTCTCCATC-6	2.78881	0.322801	6	9W	Male	HE9W_E1	PGC	mitotic
GTACTCCAGAGACTTA-6	-1.2952	-0.909483	6	9W	Male	HE9W_E1	PGC	Cycling
GTACTCCGTATATCCG-6	-2.2747	-4.00919	6	9W	Male	HE9W_E1	PGC	Cycling
GTACTTTCACTGCCAG-6	-5.12848	2.07152	6	9W	Male	HE9W_E1	PGC	SPARC_Pos
GTACTTTGTTATCGGT-6	-0.198217	-0.398978	6	9W	Male	HE9W_E1	PGC	mitotic
GTAGGCCAGAATTCCC-6	-2.28288	-3.30715	6	9W	Male	HE9W_E1	PGC	Cycling
GTAGTCAGTCACTTCC-6	1.90507	0.30004	6	9W	Male	HE9W_E1	PGC	mitotic
GTATCTTAGTGTCTCA-6	3.00411	2.00212	6	9W	Male	HE9W_E1	PGC	mitotic
GTATCTTGTAGGCATG-6	1.45845	4.15254	6	9W	Male	HE9W_E1	PGC	mitotic
GTCAAGTCAAGTACCT-6	-0.495231	0.244718	6	9W	Male	HE9W_E1	PGC	Cycling
GTCAAGTCAGGTGGAT-6	0.421565	0.0964514	6	9W	Male	HE9W_E1	PGC	mitotic
GTCACAAGTCTCACCT-6	-0.339871	-1.05799	6	9W	Male	HE9W_E1	PGC	Cycling
GTCACAATCTCTTATG-6	-2.41084	-3.13616	6	9W	Male	HE9W_E1	PGC	Cycling
GTCACGGAGCGATCCC-6	-0.18279	-1.32817	6	9W	Male	HE9W_E1	PGC	Cycling
GTCACGGAGGGATCTG-6	3.37687	3.27363	6	9W	Male	HE9W_E1	PGC	mitotic
GTCACGGCATCTCCCA-6	8.71899	4.56486	6	9W	Male	HE9W_E1	PGC	mitotic
GTCATTTAGCGTTCCG-6	6.60721	0.619081	6	9W	Male	HE9W_E1	PGC	mitotic
GTCATTTCATTCCTGC-6	-1.30924	-2.70931	6	9W	Male	HE9W_E1	PGC	Cycling
GTCATTTGTAGCGCAA-6	-0.407608	-0.571377	6	9W	Male	HE9W_E1	PGC	Cycling
GTCATTTGTGTGCGTC-6	1.79326	-0.158569	6	9W	Male	HE9W_E1	PGC	mitotic
GTCATTTTCCATTCTA-6	2.14309	1.82126	6	9W	Male	HE9W_E1	PGC	mitotic
GTCGTAAAGGATATAC-6	0.446697	0.638494	6	9W	Male	HE9W_E1	PGC	mitotic
GTCTCGTAGATACACA-6	-1.73463	-1.02407	6	9W	Male	HE9W_E1	PGC	Cycling
GTCTCGTCAAGTAATG-6	0.982832	-1.02018	6	9W	Male	HE9W_E1	PGC	mitotic
GTCTCGTGTATGGTTC-6	0.0961002	0.865383	6	9W	Male	HE9W_E1	PGC	mitotic
GTCTTCGCATTCCTGC-6	1.92162	1.89323	6	9W	Male	HE9W_E1	PGC	mitotic
GTGAAGGAGTGAATTG-6	4.6873	3.89161	6	9W	Male	HE9W_E1	PGC	mitotic
GTGCAGCCAATCACAC-6	-1.79992	-2.06526	6	9W	Male	HE9W_E1	PGC	Cycling
GTGCAGCCACATCCGG-6	1.16242	0.708285	6	9W	Male	HE9W_E1	PGC	mitotic
GTGCAGCCAGTGGAGT-6	2.99992	-1.32239	6	9W	Male	HE9W_E1	PGC	mitotic
GTGCAGCGTCATGCCG-6	2.06132	-0.551538	6	9W	Male	HE9W_E1	PGC	mitotic
GTGCATACACGGTGTC-6	2.68204	-0.105131	6	9W	Male	HE9W_E1	PGC	mitotic
GTGCGGTCATGCGCAC-6	2.86049	4.43901	6	9W	Male	HE9W_E1	PGC	mitotic
GTGCGGTGTCTCACCT-6	3.28746	-1.18127	6	9W	Male	HE9W_E1	PGC	mitotic
GTGCTTCAGTGAACGC-6	0.787868	2.96347	6	9W	Male	HE9W_E1	PGC	mitotic
GTGCTTCAGTTACGGG-6	3.75377	1.80465	6	9W	Male	HE9W_E1	PGC	mitotic
GTGCTTCTCAGTGCAT-6	2.584	3.16255	6	9W	Male	HE9W_E1	PGC	mitotic
GTGCTTCTCCGGGTGT-6	4.40537	2.84413	6	9W	Male	HE9W_E1	PGC	mitotic
GTGGGTCAGACCGGAT-6	-2.41702	-2.11059	6	9W	Male	HE9W_E1	PGC	Cycling
GTGGGTCAGTCCGGTC-6	2.71154	0.778134	6	9W	Male	HE9W_E1	PGC	mitotic
GTGTGCGAGTCAAGGC-6	2.64381	-0.962084	6	9W	Male	HE9W_E1	PGC	mitotic
GTGTGCGCACAGGCCT-6	1.18385	1.16877	6	9W	Male	HE9W_E1	PGC	mitotic
GTGTGCGTCTTGTTTG-6	2.67444	0.886155	6	9W	Male	HE9W_E1	PGC	mitotic
GTTAAGCGTCAGCTAT-6	1.72918	-3.07985	6	9W	Male	HE9W_E1	PGC	Cycling
GTTAAGCTCATAAAGG-6	-2.48658	-3.92596	6	9W	Male	HE9W_E1	PGC	Cycling
GTTAAGCTCCGCGTTT-6	-0.23577	0.241563	6	9W	Male	HE9W_E1	PGC	mitotic
GTTAAGCTCTCTAGGA-6	5.92931	4.76746	6	9W	Male	HE9W_E1	PGC	mitotic
GTTCATTCAATCCAAC-6	2.60726	0.435225	6	9W	Male	HE9W_E1	PGC	mitotic
GTTCATTGTATTCTCT-6	2.19623	1.42349	6	9W	Male	HE9W_E1	PGC	mitotic
GTTCGGGGTTCACGGC-6	-1.39732	-2.88853	6	9W	Male	HE9W_E1	PGC	Cycling
GTTCGGGTCTTCCTTC-6	0.754705	-0.174276	6	9W	Male	HE9W_E1	PGC	mitotic
GTTCTCGCATCTATGG-6	-2.27745	-3.28765	6	9W	Male	HE9W_E1	PGC	Cycling
TAAACCGTCAGCACAT-6	2.43007	0.812531	6	9W	Male	HE9W_E1	PGC	mitotic
TAAGAGACAGCCAGAA-6	2.38034	4.23697	6	9W	Male	HE9W_E1	PGC	mitotic
TAAGTGCCACCAGATT-6	4.52911	1.39194	6	9W	Male	HE9W_E1	PGC	mitotic
TAAGTGCCACCTCGTT-6	1.63914	-0.375452	6	9W	Male	HE9W_E1	PGC	mitotic
TAAGTGCGTCAGCTAT-6	-3.04318	-2.64345	6	9W	Male	HE9W_E1	PGC	Cycling
TACACGATCGAACGGA-6	-0.676709	-2.77744	6	9W	Male	HE9W_E1	PGC	Cycling
TACAGTGGTACCAGTT-6	2.06572	1.85803	6	9W	Male	HE9W_E1	PGC	mitotic
TACCTATGTCCATGAT-6	-2.67452	-2.82298	6	9W	Male	HE9W_E1	PGC	Cycling
TACCTATGTGTTGGGA-6	-0.272565	-2.03093	6	9W	Male	HE9W_E1	PGC	Cycling
TACGGATAGGATCGCA-6	4.04597	1.31147	6	9W	Male	HE9W_E1	PGC	mitotic
TACGGATTCAACGAAA-6	1.88961	0.841366	6	9W	Male	HE9W_E1	PGC	mitotic
TACGGGCCAATTGCTG-6	-0.550386	-1.10626	6	9W	Male	HE9W_E1	PGC	Cycling
TACGGGCTCTGAGTGT-6	1.40845	1.60226	6	9W	Male	HE9W_E1	PGC	mitotic
TACTCATCAACGCACC-6	-2.15282	-1.61771	6	9W	Male	HE9W_E1	PGC	Cycling
TACTCATCATTGGGCC-6	-0.458151	-3.36964	6	9W	Male	HE9W_E1	PGC	Cycling
TACTCGCGTTGCCTCT-6	-1.1424	-2.1956	6	9W	Male	HE9W_E1	PGC	Cycling
TACTTACAGCTCAACT-6	-2.35056	-3.77518	6	9W	Male	HE9W_E1	PGC	Cycling
TACTTACAGGCCCGTT-6	0.162509	-3.06272	6	9W	Male	HE9W_E1	PGC	Cycling
TAGACCACAGGTGGAT-6	3.32069	0.971807	6	9W	Male	HE9W_E1	PGC	mitotic
TAGACCAGTTATCACG-6	-2.13474	-1.98106	6	9W	Male	HE9W_E1	PGC	Cycling
TAGAGCTAGCTGCAAG-6	-1.4646	-4.85544	6	9W	Male	HE9W_E1	PGC	Cycling
TAGCCGGAGGACGAAA-6	1.38969	3.03206	6	9W	Male	HE9W_E1	PGC	mitotic
TAGCCGGCAAGGGTCA-6	1.94411	1.9075	6	9W	Male	HE9W_E1	PGC	mitotic
TAGTGGTAGCTGATAA-6	1.99822	-0.453508	6	9W	Male	HE9W_E1	PGC	mitotic
TAGTGGTCAGTCGATT-6	4.72297	-1.36808	6	9W	Male	HE9W_E1	PGC	mitotic
TAGTGGTTCGCTTAGA-6	-2.2743	0.159989	6	9W	Male	HE9W_E1	PGC	mitotic
TATCTCACAGCTGTGC-6	-4.5901	0.558208	6	9W	Male	HE9W_E1	PGC	SPARC_Pos
TATTACCCATCGGGTC-6	5.88435	1.91201	6	9W	Male	HE9W_E1	PGC	mitotic
TATTACCTCTCGCATC-6	-5.13132	1.75286	6	9W	Male	HE9W_E1	PGC	SPARC_Pos
TCAATCTCAGTTTACG-6	2.73904	1.55465	6	9W	Male	HE9W_E1	PGC	mitotic
TCAATCTTCCTTTCGG-6	0.0476492	1.20318	6	9W	Male	HE9W_E1	PGC	mitotic
TCAATCTTCGCCAGCA-6	3.3617	1.93583	6	9W	Male	HE9W_E1	PGC	mitotic
TCAGATGGTGTAACGG-6	6.18247	0.0554366	6	9W	Male	HE9W_E1	PGC	mitotic
TCAGATGTCTTACCGC-6	-2.12229	-1.9927	6	9W	Male	HE9W_E1	PGC	Cycling
TCAGCTCGTCGTGGCT-6	-1.14086	-0.839789	6	9W	Male	HE9W_E1	PGC	Cycling
TCAGCTCTCTGCAGTA-6	-0.79213	-2.69352	6	9W	Male	HE9W_E1	PGC	Cycling
TCAGGTATCTGATTCT-6	2.06432	1.20306	6	9W	Male	HE9W_E1	PGC	mitotic
TCCACACGTATATGAG-6	0.845813	0.0621064	6	9W	Male	HE9W_E1	PGC	mitotic
TCCACACTCAGTCCCT-6	2.16891	1.36227	6	9W	Male	HE9W_E1	PGC	mitotic
TCCCGATCAATAGAGT-6	2.50831	3.37621	6	9W	Male	HE9W_E1	PGC	mitotic
TCCCGATGTCATTAGC-6	1.69578	0.296019	6	9W	Male	HE9W_E1	PGC	mitotic
TCGAGGCTCCTTCAAT-6	3.50745	-1.25605	6	9W	Male	HE9W_E1	PGC	mitotic
TCGCGAGAGGGAACGG-6	7.4114	1.59321	6	9W	Male	HE9W_E1	PGC	mitotic
TCGCGAGTCATCTGTT-6	-1.30441	-2.33651	6	9W	Male	HE9W_E1	PGC	Cycling
TCGCGTTTCCAAGTAC-6	6.88155	0.504694	6	9W	Male	HE9W_E1	PGC	mitotic
TCGCGTTTCTCGATGA-6	-0.791731	-3.34729	6	9W	Male	HE9W_E1	PGC	Cycling
TCGGTAACACCGATAT-6	4.30034	2.03321	6	9W	Male	HE9W_E1	PGC	mitotic
TCGTACCGTAGGAGTC-6	0.158865	-2.52986	6	9W	Male	HE9W_E1	PGC	Cycling
TCGTAGAGTCATCCCT-6	0.871339	0.20856	6	9W	Male	HE9W_E1	PGC	mitotic
TCTATTGAGACAAAGG-6	0.296666	-7.60025	6	9W	Male	HE9W_E1	PGC	Arrest
TCTATTGTCTCCAACC-6	2.88938	0.777084	6	9W	Male	HE9W_E1	PGC	mitotic
TCTCATACAATGACCT-6	6.34639	-2.90234	6	9W	Male	HE9W_E1	PGC	mitotic
TCTCTAACATGATCCA-6	-1.69259	-3.3472	6	9W	Male	HE9W_E1	PGC	Cycling
TCTGAGAAGATGGGTC-6	4.9332	1.92288	6	9W	Male	HE9W_E1	PGC	mitotic
TCTGAGATCTCCGGTT-6	2.50766	1.07419	6	9W	Male	HE9W_E1	PGC	mitotic
TCTTCGGGTCTCTTTA-6	4.39612	5.37796	6	9W	Male	HE9W_E1	PGC	mitotic
TCTTTCCTCCTTGCCA-6	-2.87909	-3.37115	6	9W	Male	HE9W_E1	PGC	Cycling
TGACAACTCAGCGACC-6	3.45323	2.54416	6	9W	Male	HE9W_E1	PGC	mitotic
TGACAACTCTCGCTTG-6	2.56193	-0.814223	6	9W	Male	HE9W_E1	PGC	mitotic
TGACGGCCACATGTGT-6	-1.50639	-0.650555	6	9W	Male	HE9W_E1	PGC	Cycling
TGACGGCCACTTCGAA-6	-1.38113	-1.26678	6	9W	Male	HE9W_E1	PGC	Cycling
TGACGGCGTCATGCCG-6	-2.08922	-5.68843	6	9W	Male	HE9W_E1	PGC	Cycling
TGACGGCGTCTTCAAG-6	-0.388368	-7.8584	6	9W	Male	HE9W_E1	PGC	Arrest
TGACTTTAGCCTATGT-6	3.811	1.00681	6	9W	Male	HE9W_E1	PGC	mitotic
TGAGAGGTCTTCGAGA-6	1.14962	0.404139	6	9W	Male	HE9W_E1	PGC	mitotic
TGAGCCGGTTCGAATC-6	-0.228371	-2.28721	6	9W	Male	HE9W_E1	PGC	Cycling
TGAGCCGTCGTGGGAA-6	7.05476	2.49168	6	9W	Male	HE9W_E1	PGC	mitotic
TGAGGGAGTGCCTGTG-6	2.62671	-0.53175	6	9W	Male	HE9W_E1	PGC	mitotic
TGAGGGATCCACGTTC-6	3.05486	2.28293	6	9W	Male	HE9W_E1	PGC	mitotic
TGATTTCCACATGTGT-6	-0.381144	0.463482	6	9W	Male	HE9W_E1	PGC	mitotic
TGCACCTCAAGGGTCA-6	0.685	1.98625	6	9W	Male	HE9W_E1	PGC	mitotic
TGCACCTCACCGAAAG-6	-5.48472	1.2485	6	9W	Male	HE9W_E1	PGC	SPARC_Pos
TGCACCTGTGCAGTAG-6	-1.53429	-2.00405	6	9W	Male	HE9W_E1	PGC	Cycling
TGCCAAAGTCTCGTTC-6	2.15084	-0.215207	6	9W	Male	HE9W_E1	PGC	mitotic
TGCCAAAGTGGCAAAC-6	-1.45033	-0.559448	6	9W	Male	HE9W_E1	PGC	Cycling
TGCCAAATCCTTTCGG-6	2.73057	-0.237072	6	9W	Male	HE9W_E1	PGC	mitotic
TGCCCTATCCCATTTA-6	-1.59703	-1.44301	6	9W	Male	HE9W_E1	PGC	Cycling
TGCCCTATCTGGTTCC-6	1.29188	2.11562	6	9W	Male	HE9W_E1	PGC	mitotic
TGCCCTATCTTATCTG-6	0.755664	0.51435	6	9W	Male	HE9W_E1	PGC	mitotic
TGCGCAGCATTTGCCC-6	-0.118379	-0.998604	6	9W	Male	HE9W_E1	PGC	Cycling
TGCGGGTAGTTAGGTA-6	-2.86622	-1.8016	6	9W	Male	HE9W_E1	PGC	Cycling
TGCGGGTCATGCCACG-6	0.217658	2.1631	6	9W	Male	HE9W_E1	PGC	mitotic
TGCGGGTGTCAGAAGC-6	-3.25012	-2.55653	6	9W	Male	HE9W_E1	PGC	Cycling
TGCGTGGCAAGGACTG-6	8.26023	2.66729	6	9W	Male	HE9W_E1	PGC	mitotic
TGCGTGGTCCCTGACT-6	1.61573	-0.628982	6	9W	Male	HE9W_E1	PGC	mitotic
TGCTACCAGGTAGCCA-6	-2.54139	-2.79218	6	9W	Male	HE9W_E1	PGC	Cycling
TGCTGCTAGCGATCCC-6	1.0148	-2.16878	6	9W	Male	HE9W_E1	PGC	mitotic
TGGACGCGTTATCGGT-6	-2.95456	-2.05543	6	9W	Male	HE9W_E1	PGC	Cycling
TGGCCAGAGTCGTTTG-6	0.336541	1.10331	6	9W	Male	HE9W_E1	PGC	mitotic
TGGCCAGTCCTCGCAT-6	-3.206	-2.73783	6	9W	Male	HE9W_E1	PGC	Cycling
TGGCGCAGTTGATTGC-6	2.96619	-0.902122	6	9W	Male	HE9W_E1	PGC	mitotic
TGGCTGGGTAGCCTAT-6	3.30283	-0.965615	6	9W	Male	HE9W_E1	PGC	mitotic
TGGGAAGAGTACGATA-6	1.49759	2.95861	6	9W	Male	HE9W_E1	PGC	mitotic
TGGGCGTCAAGACGTG-6	0.83937	0.538626	6	9W	Male	HE9W_E1	PGC	mitotic
TGGGCGTCATGCATGT-6	2.78146	2.34763	6	9W	Male	HE9W_E1	PGC	mitotic
TGGGCGTGTTGTGGCC-6	4.80777	4.37519	6	9W	Male	HE9W_E1	PGC	mitotic
TGGTTAGAGTAATCCC-6	2.98319	1.04942	6	9W	Male	HE9W_E1	PGC	mitotic
TGGTTAGAGTTGTCGT-6	2.27524	-0.250914	6	9W	Male	HE9W_E1	PGC	mitotic
TGGTTAGGTAGAGTGC-6	-2.39117	-1.1554	6	9W	Male	HE9W_E1	PGC	Cycling
TGGTTAGGTCCGAATT-6	4.56135	1.93033	6	9W	Male	HE9W_E1	PGC	mitotic
TGGTTCCGTCGGCACT-6	-1.26424	-1.91574	6	9W	Male	HE9W_E1	PGC	Cycling
TGGTTCCTCAGTTCGA-6	-0.575679	-1.83354	6	9W	Male	HE9W_E1	PGC	Cycling
TGTATTCAGCACAGGT-6	3.76199	4.79564	6	9W	Male	HE9W_E1	PGC	mitotic
TGTATTCCACATAACC-6	1.71535	-1.03481	6	9W	Male	HE9W_E1	PGC	mitotic
TGTATTCCACCACCAG-6	0.0339507	-0.84037	6	9W	Male	HE9W_E1	PGC	Cycling
TGTATTCGTTACGGAG-6	-2.85501	-2.90669	6	9W	Male	HE9W_E1	PGC	Cycling
TGTATTCTCTGAGGGA-6	1.14015	1.56503	6	9W	Male	HE9W_E1	PGC	mitotic
TGTGGTACACGCTTTC-6	1.74771	1.26116	6	9W	Male	HE9W_E1	PGC	mitotic
TGTGGTAGTCTCCACT-6	-2.84551	-2.70957	6	9W	Male	HE9W_E1	PGC	Cycling
TGTGGTATCAGCCTAA-6	4.54719	1.48081	6	9W	Male	HE9W_E1	PGC	mitotic
TGTGGTATCCCTTGTG-6	6.7166	5.97	6	9W	Male	HE9W_E1	PGC	mitotic
TGTGTTTAGCAGGCTA-6	4.55465	4.29116	6	9W	Male	HE9W_E1	PGC	mitotic
TTAGGACAGGGTGTGT-6	4.15387	-0.619754	6	9W	Male	HE9W_E1	PGC	mitotic
TTAGTTCGTATATGGA-6	1.52628	2.07009	6	9W	Male	HE9W_E1	PGC	mitotic
TTATGCTTCAGTCCCT-6	-2.38926	-2.44089	6	9W	Male	HE9W_E1	PGC	Cycling
TTATGCTTCATATCGG-6	3.0174	-0.799908	6	9W	Male	HE9W_E1	PGC	mitotic
TTCCCAGGTTGCGTTA-6	3.00312	4.24223	6	9W	Male	HE9W_E1	PGC	mitotic
TTCGAAGCAAGCGTAG-6	-2.99354	-3.05916	6	9W	Male	HE9W_E1	PGC	Cycling
TTCGAAGCATTTGCTT-6	2.72359	0.662171	6	9W	Male	HE9W_E1	PGC	mitotic
TTCGAAGTCACGCATA-6	3.26921	1.42801	6	9W	Male	HE9W_E1	PGC	mitotic
TTCGAAGTCGGACAAG-6	-2.3961	-3.1899	6	9W	Male	HE9W_E1	PGC	Cycling
TTCGGTCAGGGAAACA-6	-1.27102	0.184581	6	9W	Male	HE9W_E1	PGC	Cycling
TTCGGTCTCAGCTGGC-6	-0.595227	-3.38252	6	9W	Male	HE9W_E1	PGC	Cycling
TTCGGTCTCGCCGTGA-6	8.78489	5.46619	6	9W	Male	HE9W_E1	PGC	mitotic
TTCTACATCAGCGACC-6	-2.16917	-2.86814	6	9W	Male	HE9W_E1	PGC	Cycling
TTCTCAAGTCAGTGGA-6	2.46089	1.71497	6	9W	Male	HE9W_E1	PGC	mitotic
TTCTTAGAGGGCACTA-6	4.76123	0.353462	6	9W	Male	HE9W_E1	PGC	mitotic
TTCTTAGAGTGAAGAG-6	1.48267	2.15065	6	9W	Male	HE9W_E1	PGC	mitotic
TTCTTAGCAACACCTA-6	-2.00865	-1.15012	6	9W	Male	HE9W_E1	PGC	Cycling
TTGAACGAGCCCAACC-6	-1.41354	-2.57612	6	9W	Male	HE9W_E1	PGC	Cycling
TTGACTTGTCCGTCAG-6	2.37358	-0.943056	6	9W	Male	HE9W_E1	PGC	mitotic
TTGCCGTAGGTCATCT-6	2.74483	1.60942	6	9W	Male	HE9W_E1	PGC	mitotic
TTGCCGTTCGCCAAAT-6	1.96293	-0.231781	6	9W	Male	HE9W_E1	PGC	mitotic
TTGCCGTTCGGATGTT-6	-2.39222	-3.49431	6	9W	Male	HE9W_E1	PGC	Cycling
TTGCGTCCATTCGACA-6	3.52463	0.862889	6	9W	Male	HE9W_E1	PGC	mitotic
TTGGAACAGGGTCGAT-6	3.4007	-1.26838	6	9W	Male	HE9W_E1	PGC	mitotic
TTGGCAAAGTTAGGTA-6	-2.25613	-3.46674	6	9W	Male	HE9W_E1	PGC	Cycling
TTGTAGGCAACAACCT-6	3.43031	3.24616	6	9W	Male	HE9W_E1	PGC	mitotic
TTGTAGGCACAGAGGT-6	2.22327	1.47146	6	9W	Male	HE9W_E1	PGC	mitotic
TTTACTGCATCTCGCT-6	5.26796	1.35746	6	9W	Male	HE9W_E1	PGC	mitotic
TTTACTGGTACATGTC-6	2.72348	0.785227	6	9W	Male	HE9W_E1	PGC	mitotic
TTTACTGGTAGCGATG-6	0.122645	1.606	6	9W	Male	HE9W_E1	PGC	mitotic
TTTATGCAGTACGTAA-6	2.24163	1.4965	6	9W	Male	HE9W_E1	PGC	mitotic
TTTATGCAGTTGTCGT-6	1.41857	2.03784	6	9W	Male	HE9W_E1	PGC	mitotic
TTTCCTCCACAAGTAA-6	-2.13877	-3.89159	6	9W	Male	HE9W_E1	PGC	Cycling
TTTGTCAGTGGGTCAA-6	5.40714	1.5407	6	9W	Male	HE9W_E1	PGC	mitotic
TTTGTCAGTTGAACTC-6	1.94502	1.80482	6	9W	Male	HE9W_E1	PGC	mitotic
AAACCTGGTACCTACA-7	3.14194	1.04037	7	10W	Male	HE10W_E1	PGC	mitotic
AAACCTGGTTACGACT-7	0.030902	1.77892	7	10W	Male	HE10W_E1	PGC	mitotic
AAACGGGTCGAGAGCA-7	-2.12947	-2.47692	7	10W	Male	HE10W_E1	PGC	Cycling
AAAGATGAGTGACTCT-7	5.91147	3.26712	7	10W	Male	HE10W_E1	PGC	mitotic
AAAGTAGAGTAGGCCA-7	3.17689	1.21354	7	10W	Male	HE10W_E1	PGC	mitotic
AAAGTAGAGTCCTCCT-7	-0.552701	-1.72471	7	10W	Male	HE10W_E1	PGC	Cycling
AAATGCCGTGCGCTTG-7	-2.01297	-5.18545	7	10W	Male	HE10W_E1	PGC	Cycling
AACACGTCAACTGCTA-7	-2.36909	-2.37439	7	10W	Male	HE10W_E1	PGC	Cycling
AACACGTTCATCGCTC-7	8.69026	2.27241	7	10W	Male	HE10W_E1	PGC	mitotic
AACCATGCACTTGGAT-7	-1.08573	-1.47817	7	10W	Male	HE10W_E1	PGC	Cycling
AACCATGGTCTTGCGG-7	9.46478	1.81052	7	10W	Male	HE10W_E1	PGC	mitotic
AACCATGTCGGAGCAA-7	8.70674	4.41227	7	10W	Male	HE10W_E1	PGC	mitotic
AACCGCGGTCATACTG-7	4.25228	2.1725	7	10W	Male	HE10W_E1	PGC	mitotic
AACTCCCCATGTCTCC-7	-0.0265313	1.09892	7	10W	Male	HE10W_E1	PGC	Cycling
AACTCTTCAGACAGGT-7	-2.82052	-3.55202	7	10W	Male	HE10W_E1	PGC	Cycling
AACTGGTCAGTGAGTG-7	-0.761563	-1.66149	7	10W	Male	HE10W_E1	PGC	Cycling
AACTTTCAGTAAGTAC-7	-2.02844	-3.59989	7	10W	Male	HE10W_E1	PGC	Cycling
AACTTTCGTACCGTAT-7	4.18775	4.79428	7	10W	Male	HE10W_E1	PGC	mitotic
AACTTTCGTACGACCC-7	-1.21678	-3.80619	7	10W	Male	HE10W_E1	PGC	Cycling
AACTTTCTCGGATGTT-7	-1.2362	-2.47669	7	10W	Male	HE10W_E1	PGC	Cycling
AACTTTCTCGTGTAGT-7	8.84585	3.13562	7	10W	Male	HE10W_E1	PGC	mitotic
AAGCCGCTCTCGCATC-7	5.32512	4.88125	7	10W	Male	HE10W_E1	PGC	mitotic
AAGGAGCGTGTGAAAT-7	-1.38988	-1.99573	7	10W	Male	HE10W_E1	PGC	Cycling
AAGGAGCTCCTCTAGC-7	6.12619	1.69661	7	10W	Male	HE10W_E1	PGC	mitotic
AAGGCAGAGAGTCGGT-7	-1.40567	-0.551854	7	10W	Male	HE10W_E1	PGC	Cycling
AAGTCTGCATGCCTAA-7	4.74841	2.38305	7	10W	Male	HE10W_E1	PGC	mitotic
AATCCAGCAGGACGTA-7	4.68472	0.569014	7	10W	Male	HE10W_E1	PGC	mitotic
ACACCAAGTAGAGCTG-7	-1.60315	-0.604461	7	10W	Male	HE10W_E1	PGC	Cycling
ACACCAAGTGGCGAAT-7	1.58203	-2.11031	7	10W	Male	HE10W_E1	PGC	mitotic
ACACCGGGTTGATTCG-7	5.04704	0.946997	7	10W	Male	HE10W_E1	PGC	mitotic
ACACTGATCCGCAAGC-7	0.956057	1.20578	7	10W	Male	HE10W_E1	PGC	mitotic
ACACTGATCGTAGATC-7	-1.6051	-2.77253	7	10W	Male	HE10W_E1	PGC	Cycling
ACAGCCGCATATACCG-7	8.2718	3.02971	7	10W	Male	HE10W_E1	PGC	mitotic
ACAGCCGGTCCCTTGT-7	-0.707153	-3.1288	7	10W	Male	HE10W_E1	PGC	Cycling
ACATACGGTAGCGCTC-7	-1.82368	-2.16436	7	10W	Male	HE10W_E1	PGC	Cycling
ACATACGGTTCCACGG-7	8.51213	-0.928987	7	10W	Male	HE10W_E1	PGC	mitotic
ACATCAGCACAACTGT-7	7.16924	2.37352	7	10W	Male	HE10W_E1	PGC	mitotic
ACATCAGCACGGATAG-7	5.18306	1.90592	7	10W	Male	HE10W_E1	PGC	mitotic
ACATCAGTCCGGCACA-7	0.109288	-2.39342	7	10W	Male	HE10W_E1	PGC	Cycling
ACATGGTGTATAGTAG-7	6.2499	0.148782	7	10W	Male	HE10W_E1	PGC	mitotic
ACCAGTAAGAACAATC-7	0.084443	-2.73792	7	10W	Male	HE10W_E1	PGC	Cycling
ACCTTTAGTTCGTGAT-7	-1.51675	-3.69452	7	10W	Male	HE10W_E1	PGC	Cycling
ACCTTTAGTTGTCTTT-7	0.717221	1.54736	7	10W	Male	HE10W_E1	PGC	mitotic
ACGAGCCCATGATCCA-7	-2.56392	-3.82974	7	10W	Male	HE10W_E1	PGC	Cycling
ACGAGGAAGCTTATCG-7	6.71083	-3.23496	7	10W	Male	HE10W_E1	PGC	mitotic
ACGAGGACAAGCGTAG-7	2.01166	3.95793	7	10W	Male	HE10W_E1	PGC	mitotic
ACGATACAGAGACTAT-7	-1.84184	3.56871	7	10W	Male	HE10W_E1	PGC	mitotic
ACGATACCAAATCCGT-7	-2.46558	-3.82992	7	10W	Male	HE10W_E1	PGC	Cycling
ACGATACCACACGCTG-7	0.267172	-2.616	7	10W	Male	HE10W_E1	PGC	Cycling
ACGATACGTGAACCTT-7	6.96826	-0.00292014	7	10W	Male	HE10W_E1	PGC	mitotic
ACGATACGTTCAGTAC-7	3.25818	3.37152	7	10W	Male	HE10W_E1	PGC	mitotic
ACGATGTGTAAGGATT-7	6.40421	2.75322	7	10W	Male	HE10W_E1	PGC	mitotic
ACGATGTTCACATGCA-7	4.8619	2.80673	7	10W	Male	HE10W_E1	PGC	mitotic
ACGATGTTCATCGATG-7	0.0346536	-0.787149	7	10W	Male	HE10W_E1	PGC	Cycling
ACGCAGCAGAAACGCC-7	-1.46698	-4.08777	7	10W	Male	HE10W_E1	PGC	Cycling
ACGCAGCCACGAAATA-7	7.43659	3.17248	7	10W	Male	HE10W_E1	PGC	mitotic
ACGCAGCGTCATTAGC-7	-1.99163	-3.26867	7	10W	Male	HE10W_E1	PGC	Cycling
ACGCAGCGTGCCTGTG-7	7.71025	3.69102	7	10W	Male	HE10W_E1	PGC	mitotic
ACGCCAGAGATCGGGT-7	-1.43277	-3.64483	7	10W	Male	HE10W_E1	PGC	Cycling
ACGCCAGAGGATGTAT-7	5.47366	4.3041	7	10W	Male	HE10W_E1	PGC	mitotic
ACGCCGAAGCTAGTCT-7	8.0795	2.71966	7	10W	Male	HE10W_E1	PGC	mitotic
ACGCCGAGTTCCGGCA-7	4.52653	-0.593211	7	10W	Male	HE10W_E1	PGC	mitotic
ACGGAGACAAACGCGA-7	2.95418	0.710358	7	10W	Male	HE10W_E1	PGC	mitotic
ACGGAGACAGTTAACC-7	6.70704	1.15627	7	10W	Male	HE10W_E1	PGC	mitotic
ACGGAGAGTCGGATCC-7	3.02108	2.00037	7	10W	Male	HE10W_E1	PGC	mitotic
ACGGAGAGTCTCATCC-7	-0.357878	-1.47341	7	10W	Male	HE10W_E1	PGC	Cycling
ACGGAGAGTGCTCTTC-7	-1.5435	-4.21986	7	10W	Male	HE10W_E1	PGC	Cycling
ACGGCCACAGCTGCAC-7	2.29174	1.74871	7	10W	Male	HE10W_E1	PGC	mitotic
ACGGCCAGTAAGAGGA-7	-1.94908	-1.57342	7	10W	Male	HE10W_E1	PGC	Cycling
ACGGGCTCAAAGGTGC-7	5.9169	-0.01044	7	10W	Male	HE10W_E1	PGC	mitotic
ACGGGTCAGATCCCGC-7	1.8089	2.63454	7	10W	Male	HE10W_E1	PGC	mitotic
ACGGGTCAGGTAGCTG-7	8.09751	1.20063	7	10W	Male	HE10W_E1	PGC	mitotic
ACGTCAAAGAGTCTGG-7	4.98516	0.64965	7	10W	Male	HE10W_E1	PGC	mitotic
ACGTCAATCTTCGAGA-7	4.33636	4.91559	7	10W	Male	HE10W_E1	PGC	mitotic
ACTATCTAGAGTCGGT-7	4.22835	0.775991	7	10W	Male	HE10W_E1	PGC	mitotic
ACTGAACTCTCGCATC-7	7.21899	4.577	7	10W	Male	HE10W_E1	PGC	mitotic
ACTGAGTTCGTAGGAG-7	2.78706	1.59797	7	10W	Male	HE10W_E1	PGC	mitotic
ACTGATGTCCCATTTA-7	7.64947	1.23794	7	10W	Male	HE10W_E1	PGC	mitotic
ACTGCTCGTCTTTCAT-7	-2.82373	-3.21264	7	10W	Male	HE10W_E1	PGC	Cycling
ACTGTCCGTCCCTACT-7	-2.97094	-3.00946	7	10W	Male	HE10W_E1	PGC	Cycling
ACTTTCACAAGTTCTG-7	-0.141035	-0.402952	7	10W	Male	HE10W_E1	PGC	Cycling
AGAATAGCAAGAAGAG-7	4.34136	3.77074	7	10W	Male	HE10W_E1	PGC	mitotic
AGAATAGGTACAGTTC-7	5.74464	2.55496	7	10W	Male	HE10W_E1	PGC	mitotic
[truncated: 3,867 more rows]
